# Supplementary material for: Relaxation of the rigid backbone of an oligoamide-foldamer-based α-helix mimetic: identification of potent Bcl-xL inhibitors
Source: Royal Society of Chemistry journal article supplement (doi:10.1039/c2ob07125h), 2012-01-01

# **Relaxation of the rigid backbone of an oligoamide-foldamer-based $\alpha$ -helix mimetic: identification of potent Bcl-x<sub>L</sub> inhibitors**

Jeremy L. Yap,<sup>a</sup> Xiaobo Cao,<sup>b</sup> Kenno Vanommeslaeghe,<sup>a</sup> Kwan-Young Jung,<sup>a</sup> Chander S. Peddaboina,<sup>b</sup> Paul T. Wilder,<sup>c</sup> Anjan Nan,<sup>a</sup> Alexander D. Mackerell, Jr.,<sup>a,d</sup> W. Roy Smythe<sup>b</sup> and Steven Fletcher<sup>\*,a,d</sup>

<sup>a</sup>Department of Pharmaceutical Sciences, University of Maryland School of Pharmacy, 20 N. Pine St., Baltimore, MD 21201, USA; <sup>b</sup>Scott & White Memorial Hospital, 702 SW HK Dodgen loop Room 219, Temple, TX 76504, USA; <sup>c</sup>Department of Biochemistry and Molecular Biology, University of Maryland School of Medicine, 108 N. Greene Street, Baltimore, MD 21201, USA; <sup>d</sup>University of Maryland Marlene and Stewart Greenebaum Cancer Center, 22 S. Greene St., Baltimore, MD 21201, USA

E-mail: [sfletche@rx.umaryland.edu](mailto:sfletche@rx.umaryland.edu)

## **Supplementary Information: <sup>1</sup>H and <sup>13</sup>C NMR Spectra for Intermediates 7 – 20f and Target Molecules 1 – 6**





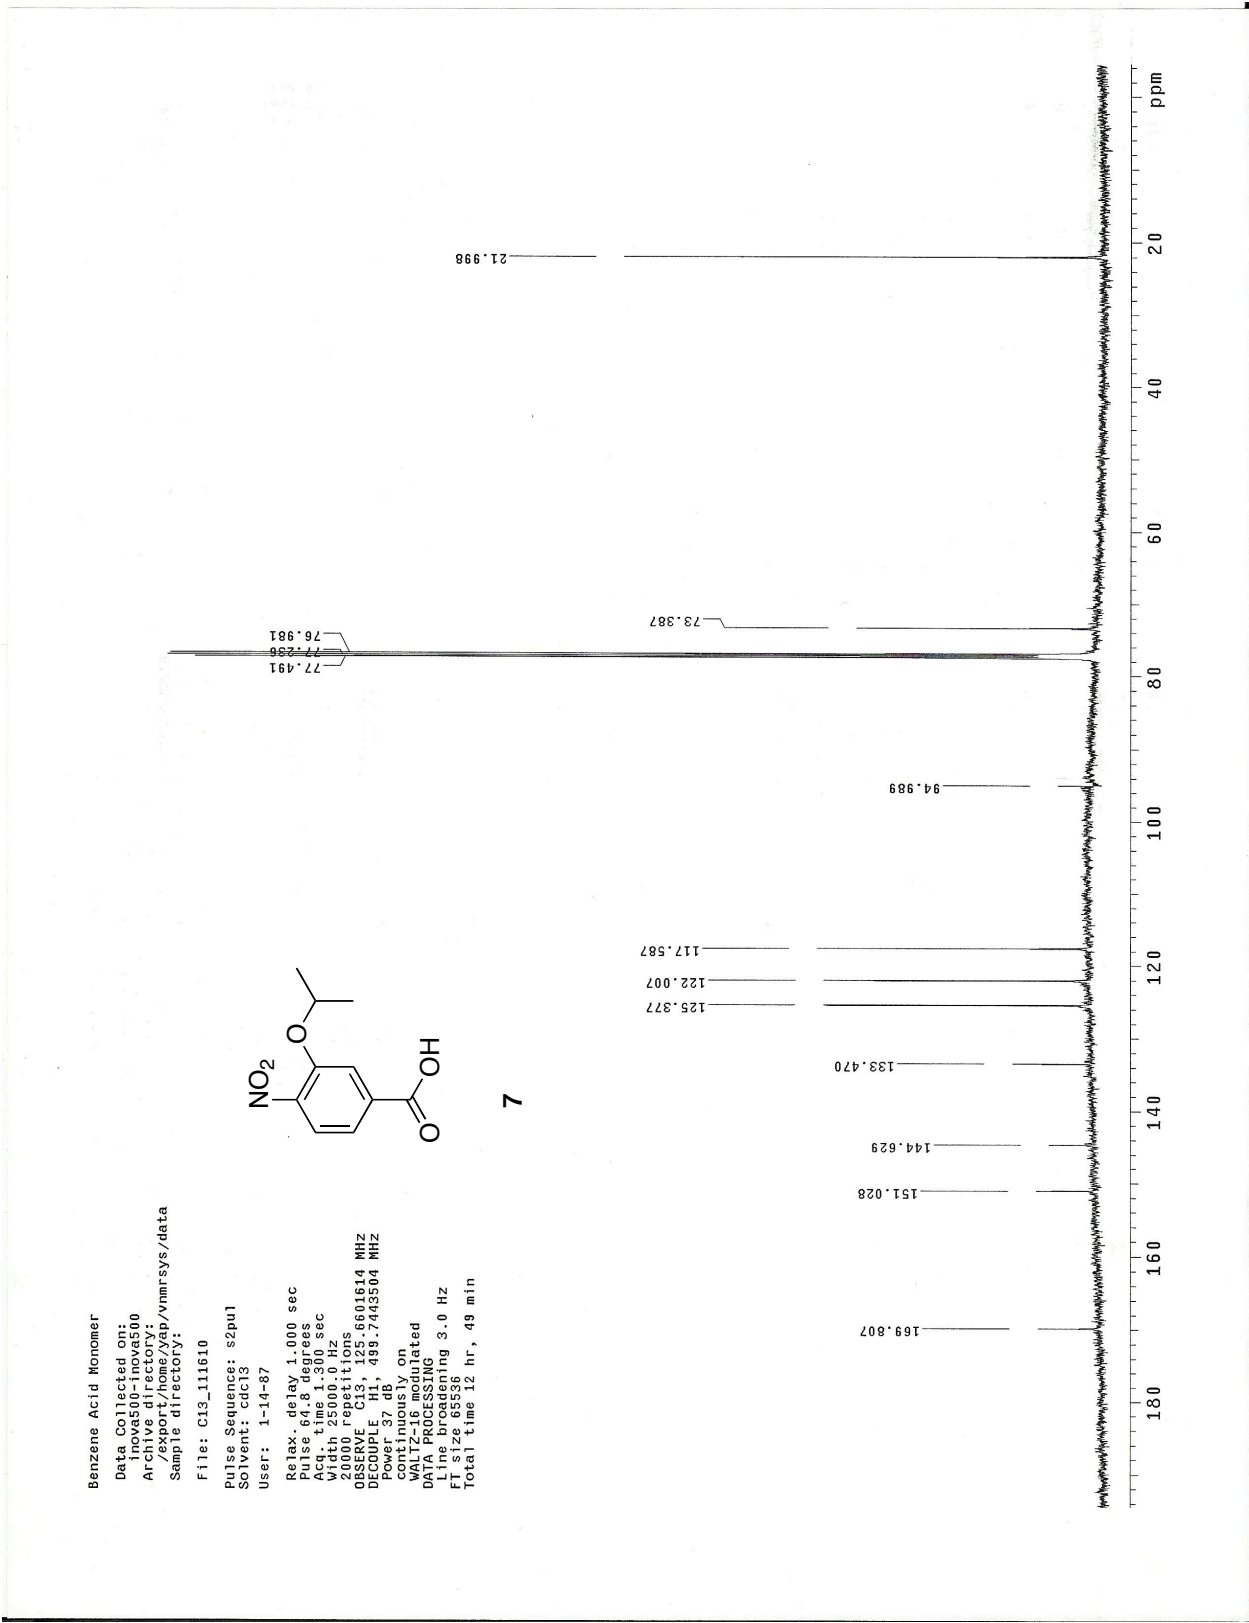

Aniline Methyl Ester  
Data Collected on:  
Inova500-Inova500  
Archive directory:  
/export/home/yap/vnmr/500/data  
Sample directory:  
File: Aniline\_Methyl\_Ester  
Pulse Sequence: s2pul  
Solvent: DMSO  
Relax. delay 50.000 sec  
Pulse 64.4 degrees  
Acq. time 0.000 sec  
Width 8000.0 Hz  
10 repetitions  
OBSERVE H1, 499.7442301 MHz  
DATA PROCESSING  
Line broadening 0.5 Hz  
Ft size 16384  
Total time 8 min

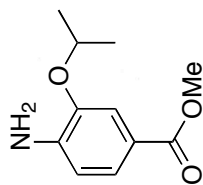

8

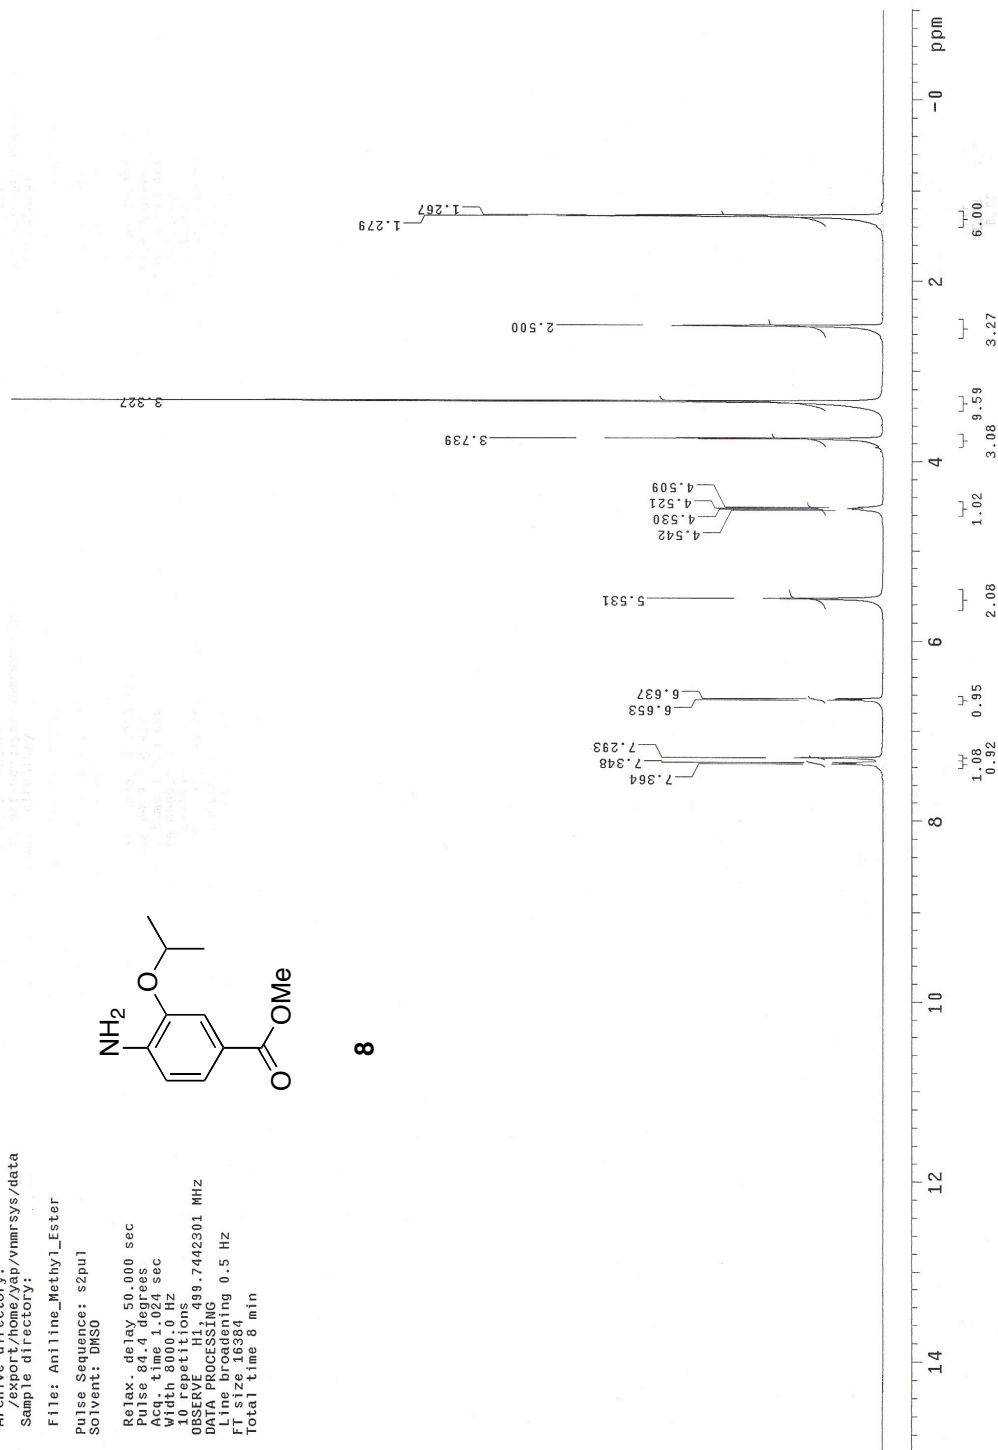

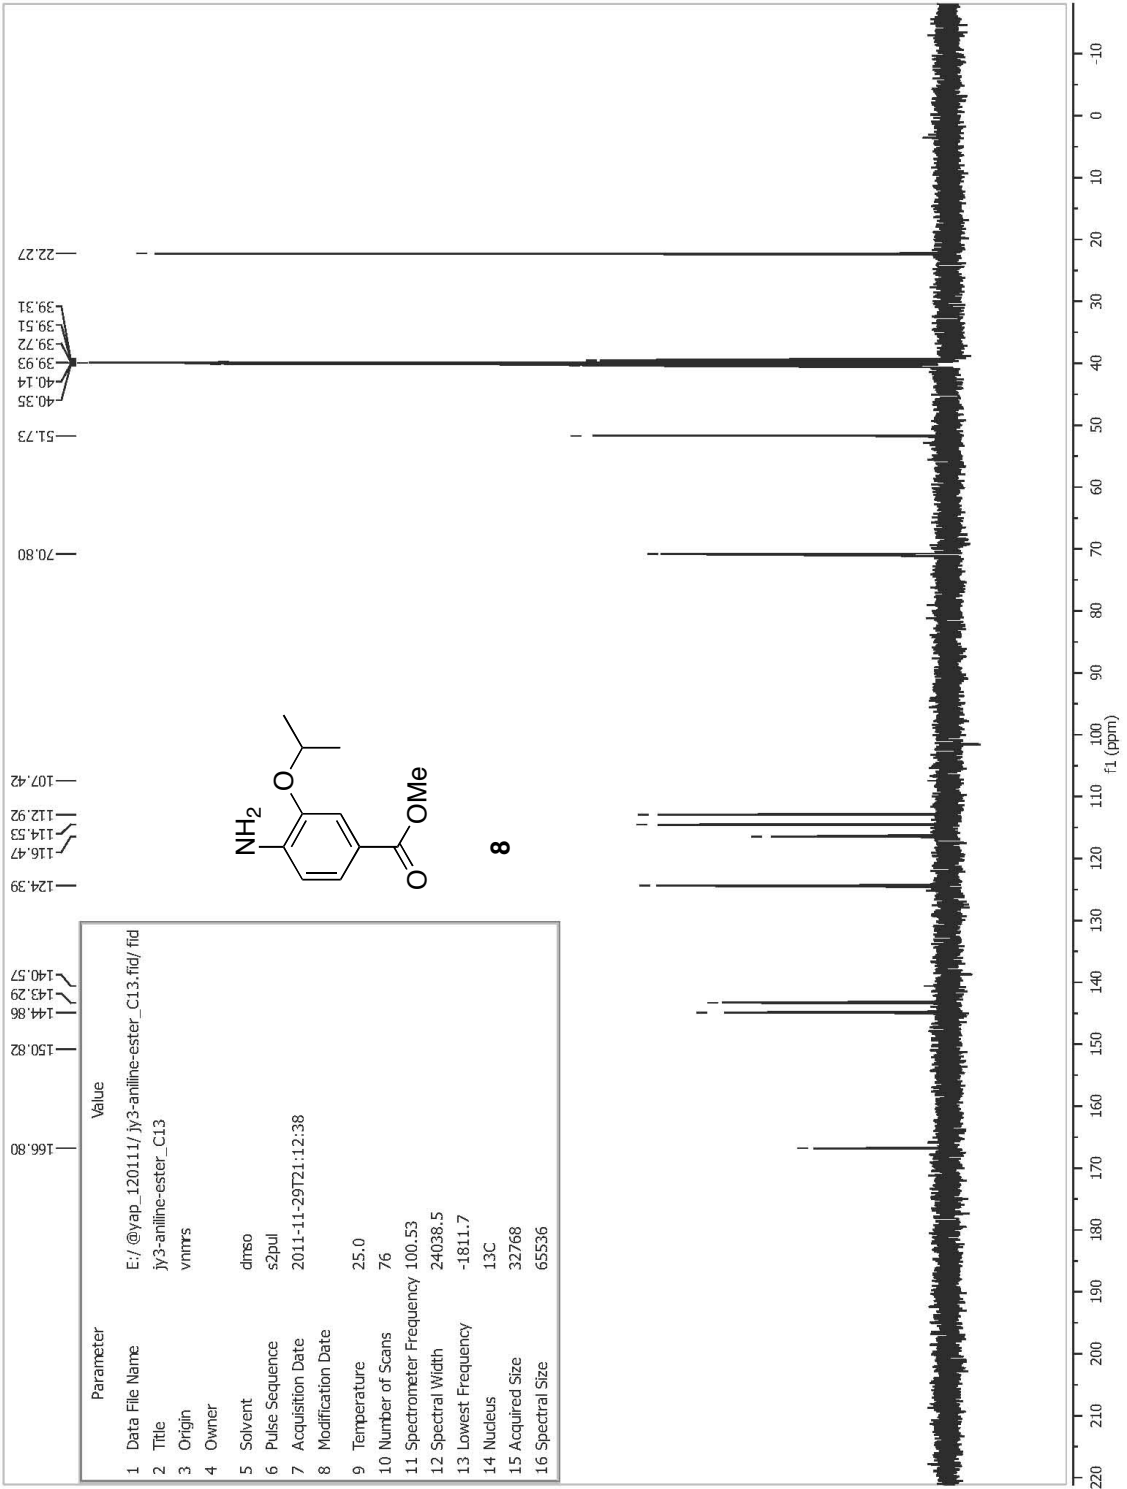

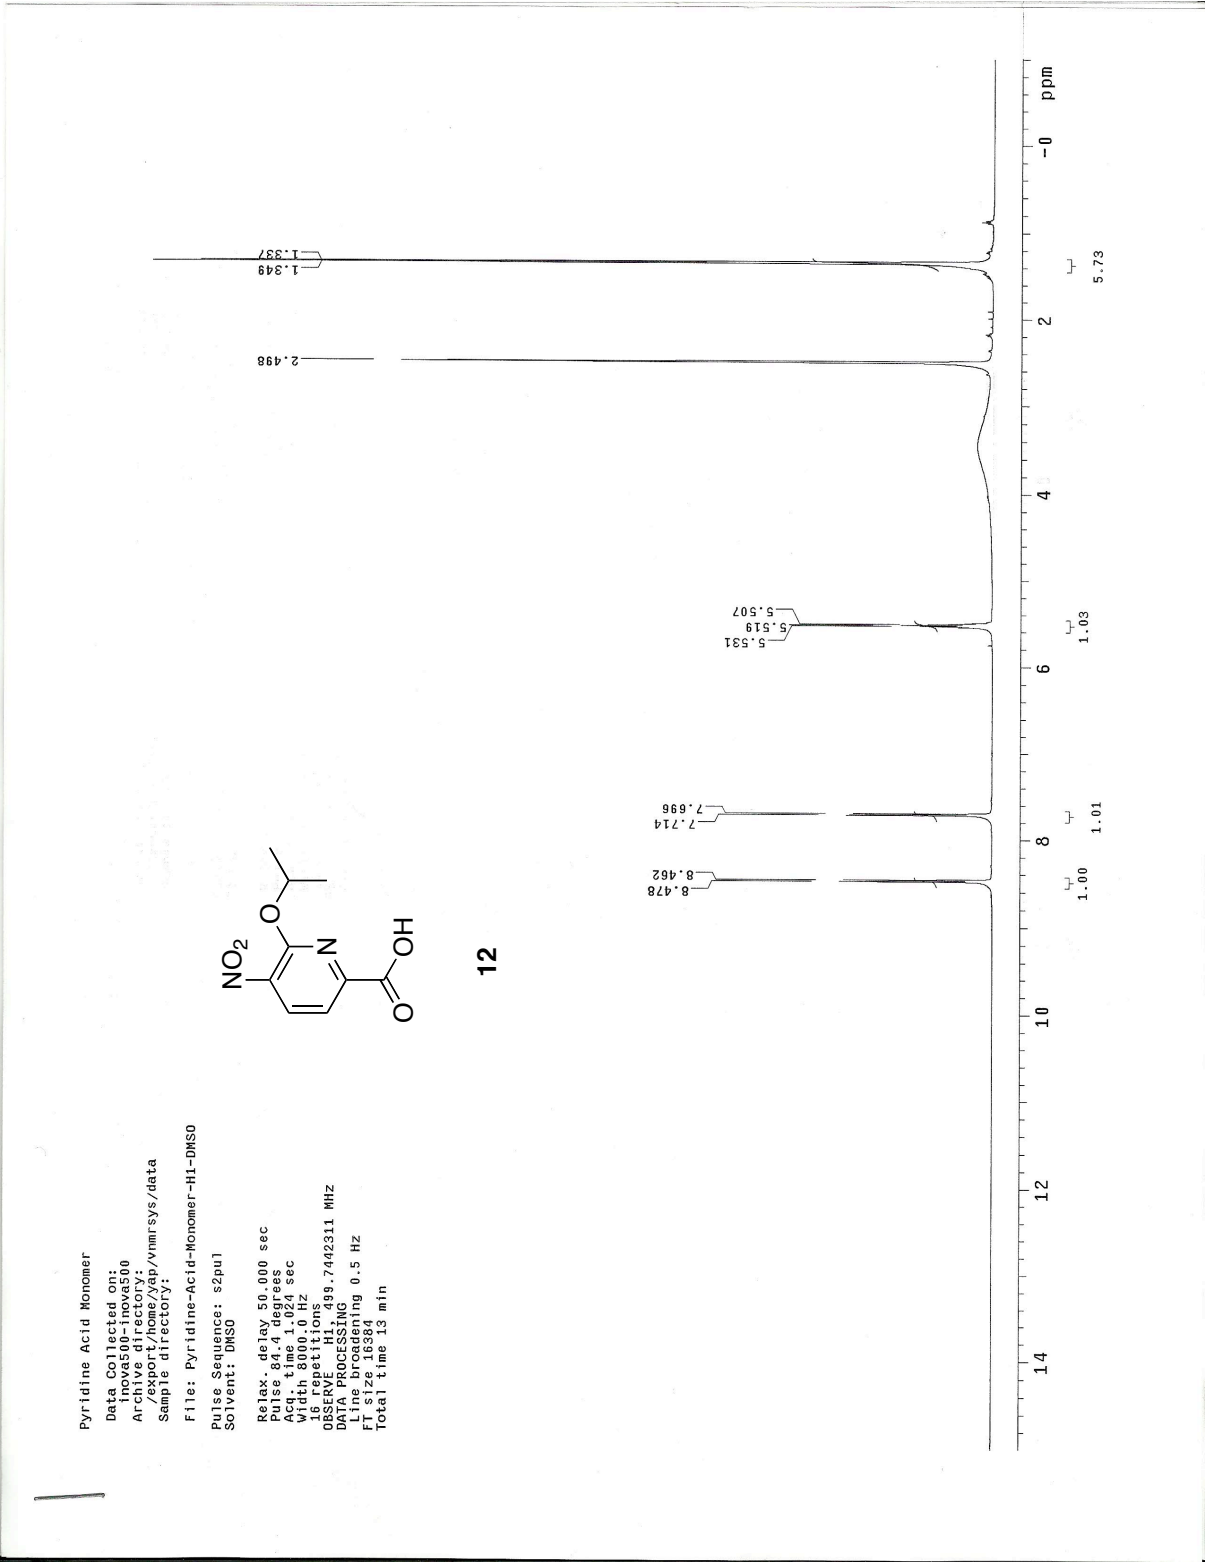

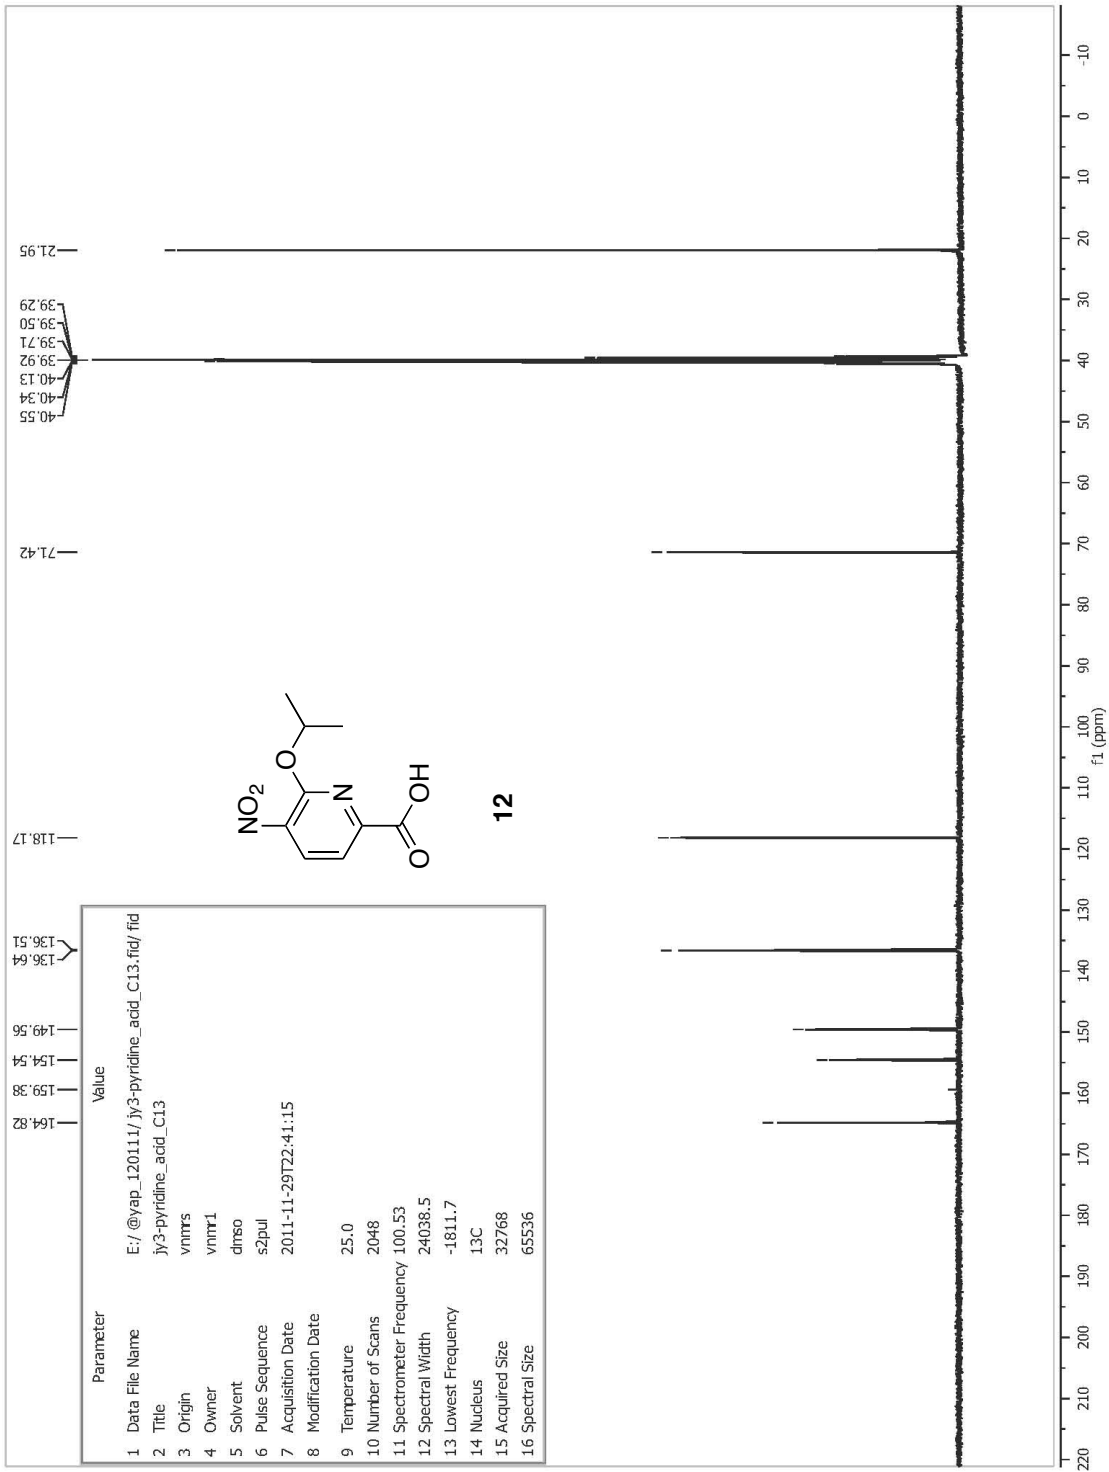

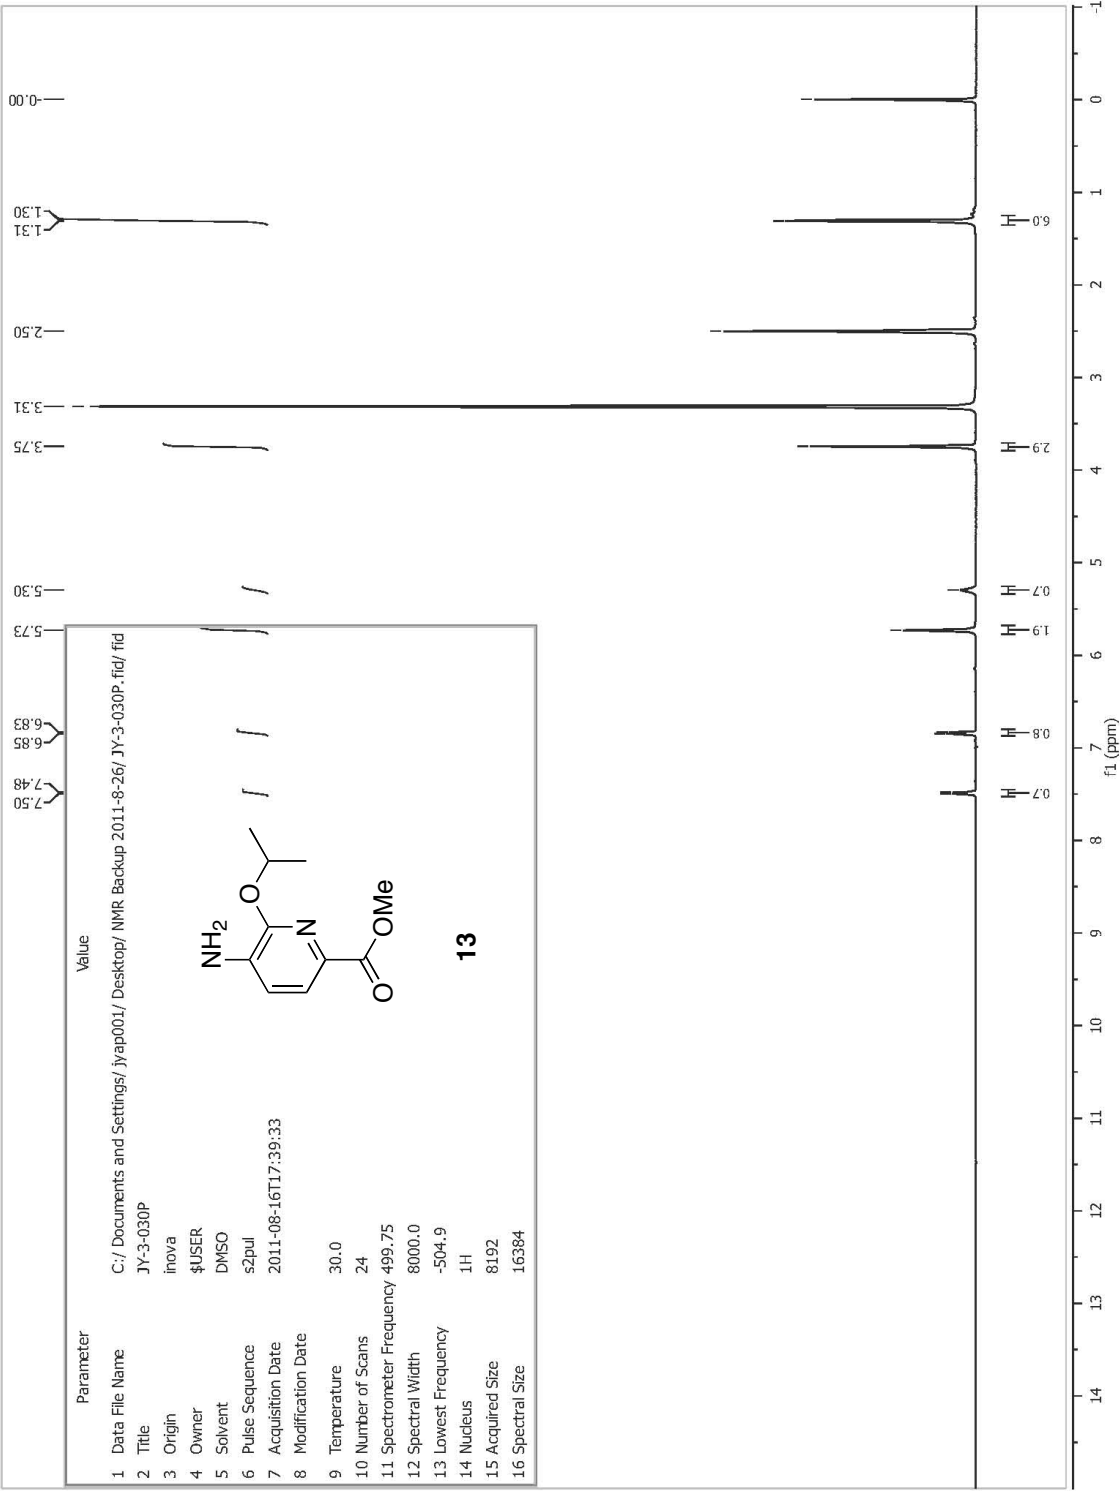

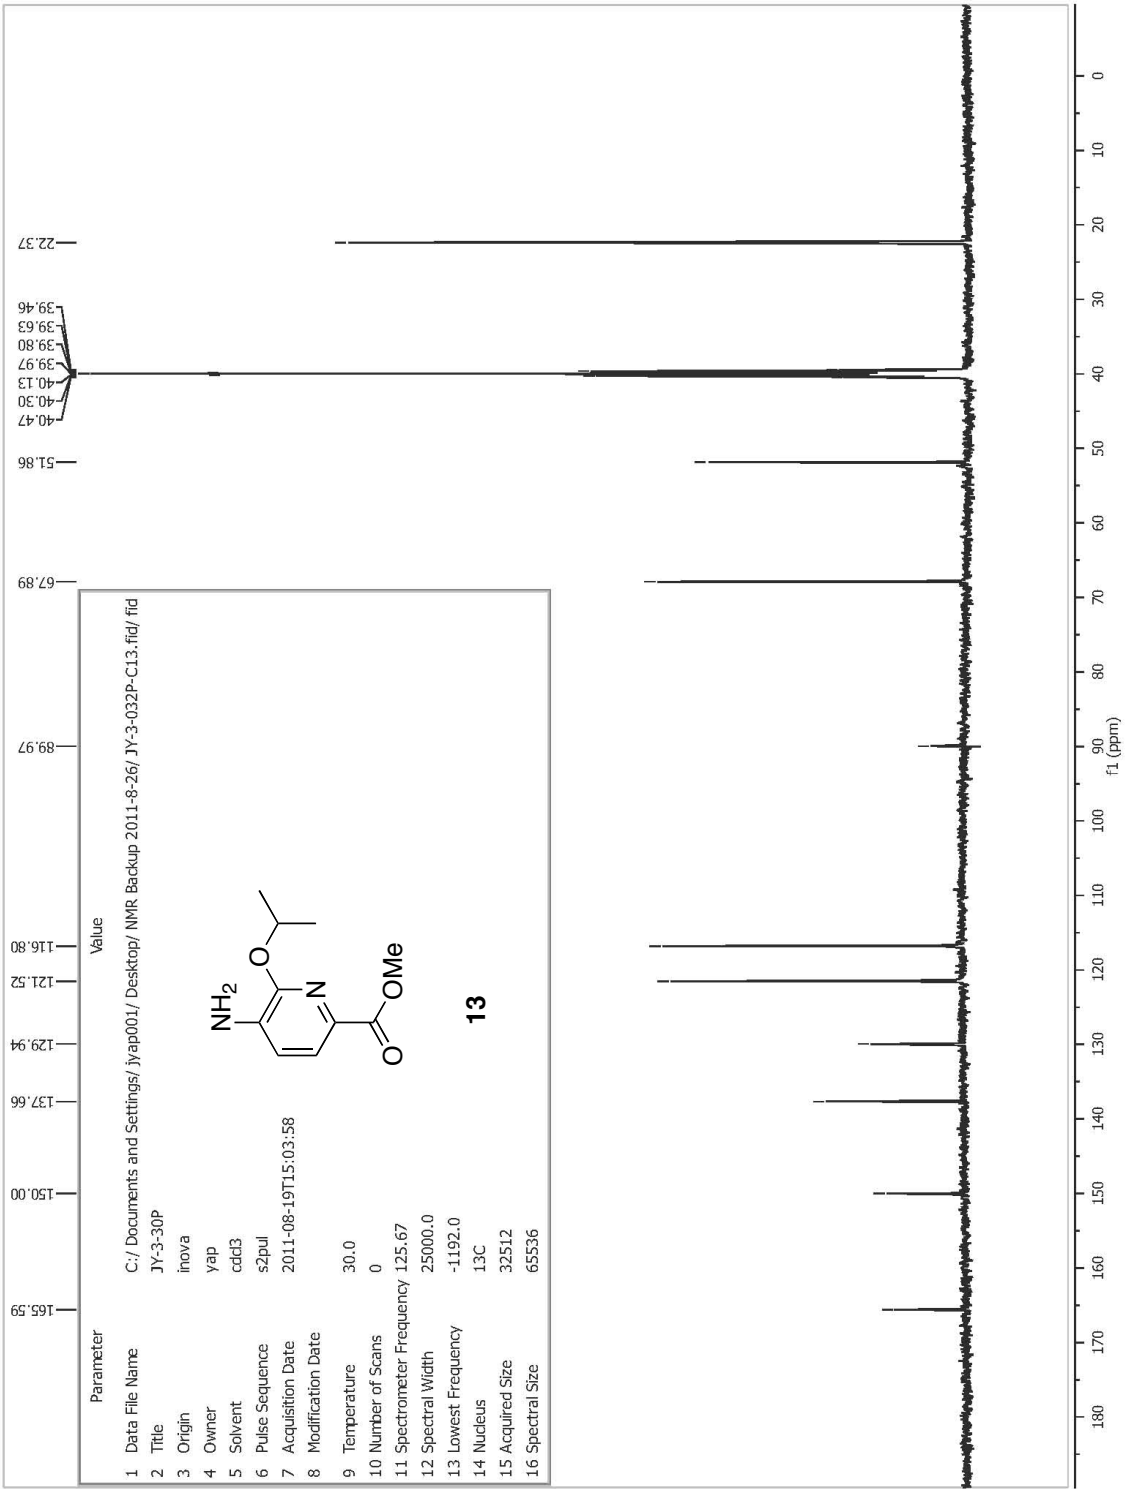

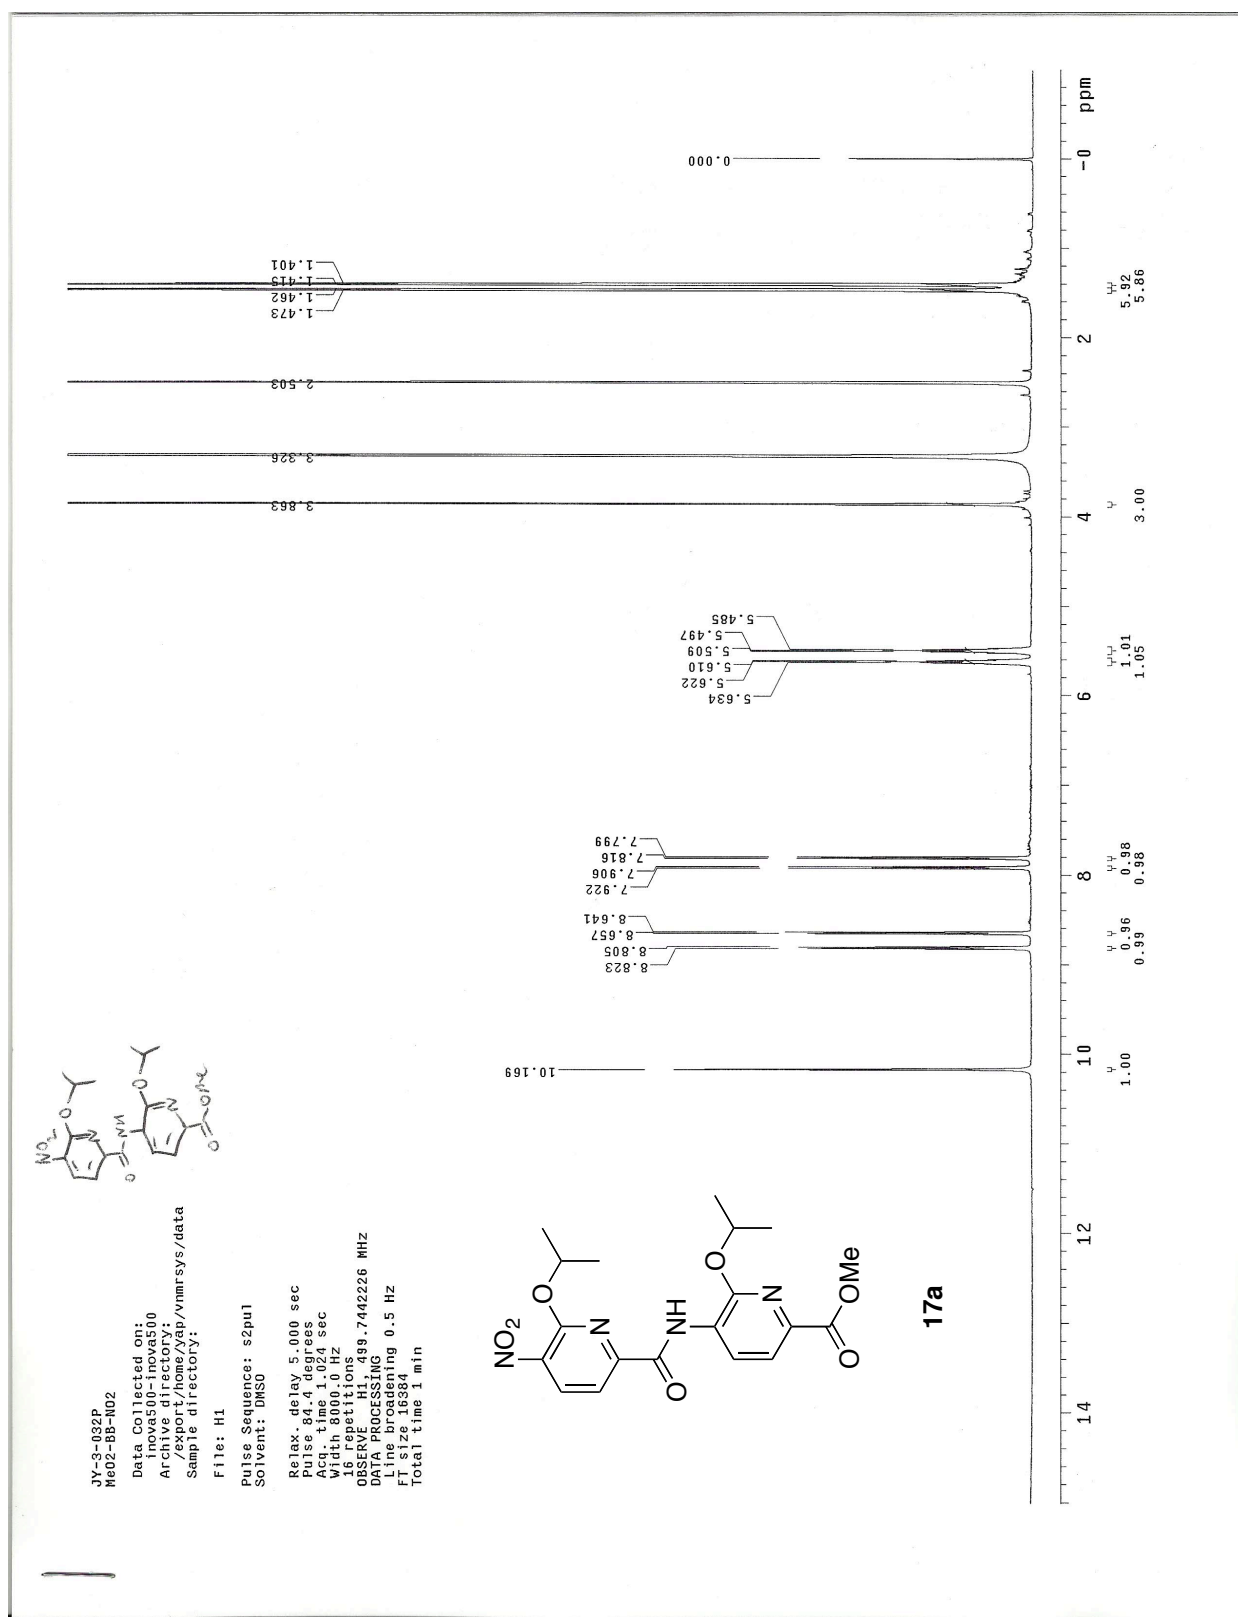



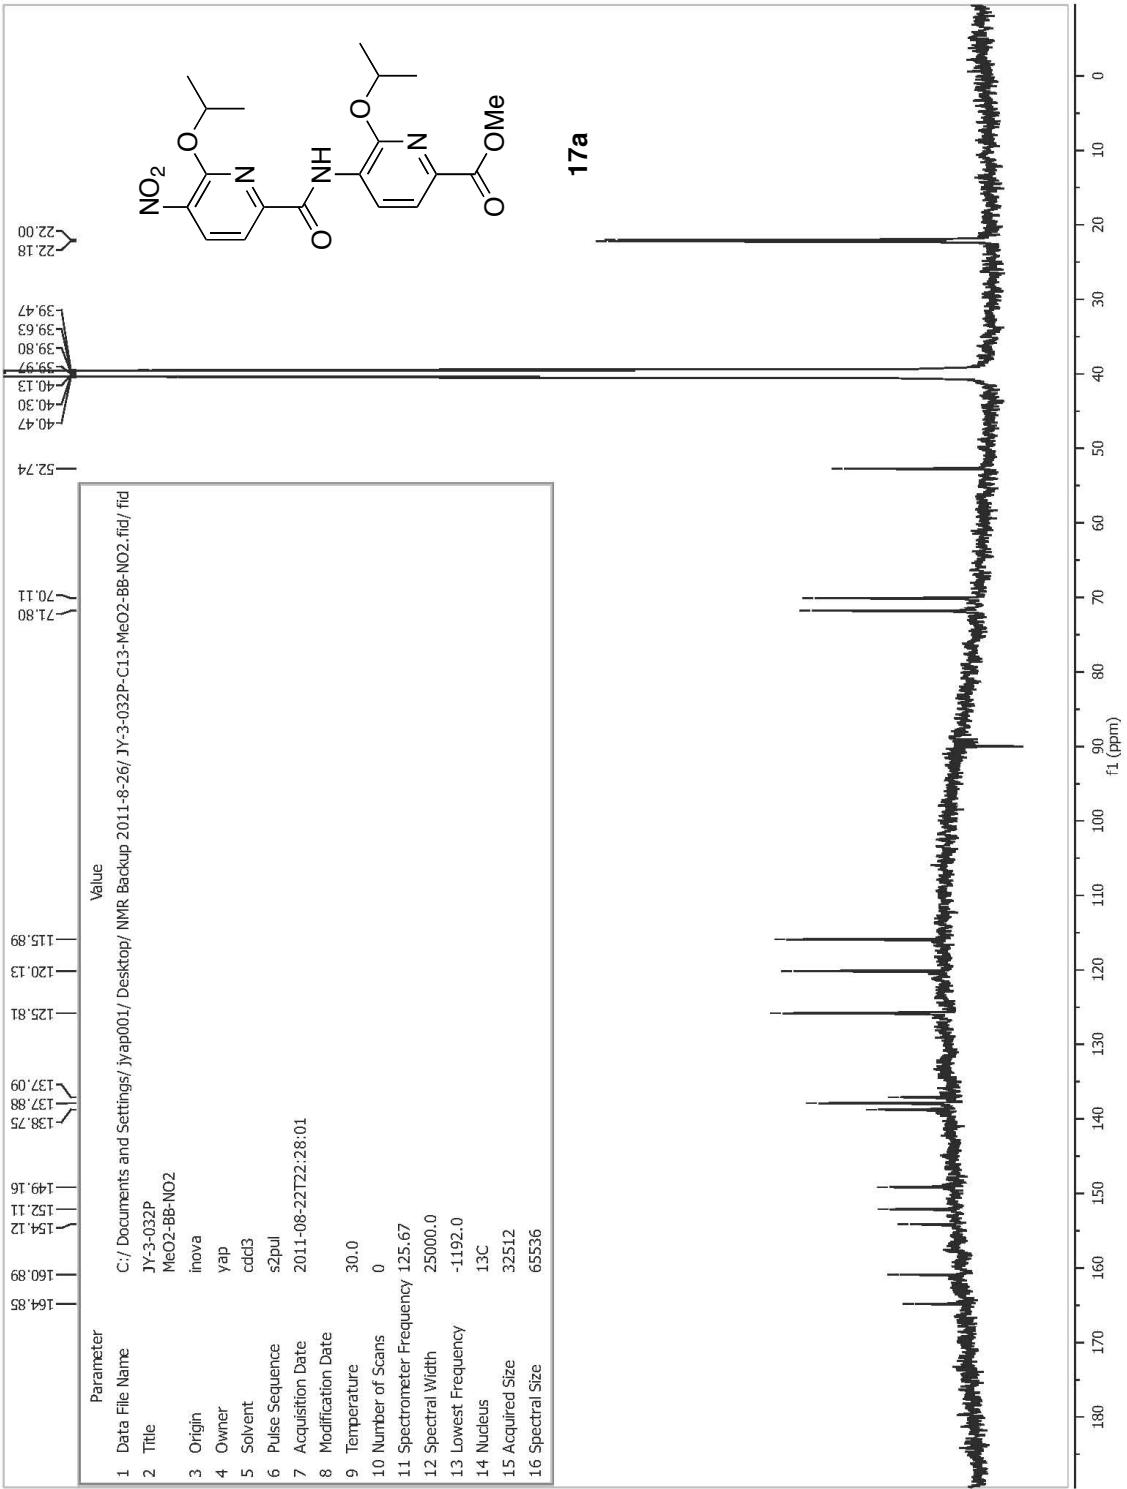

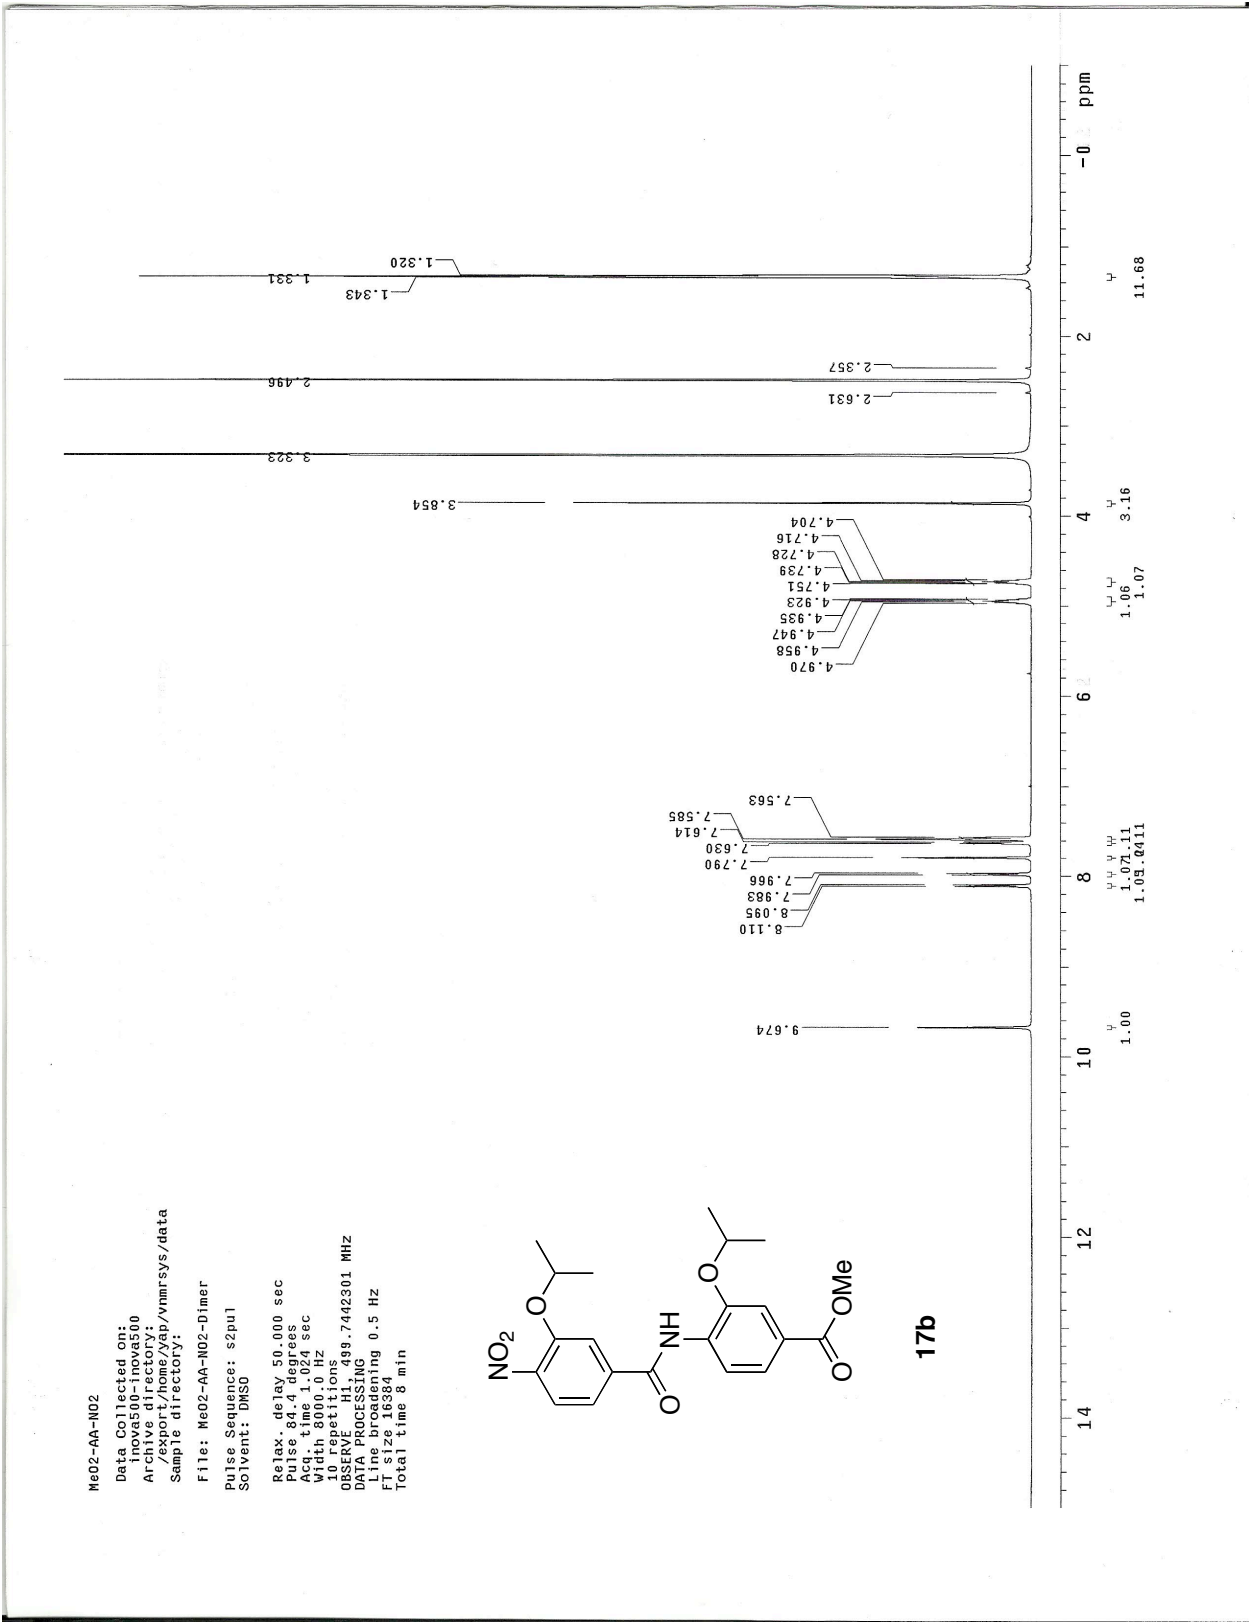

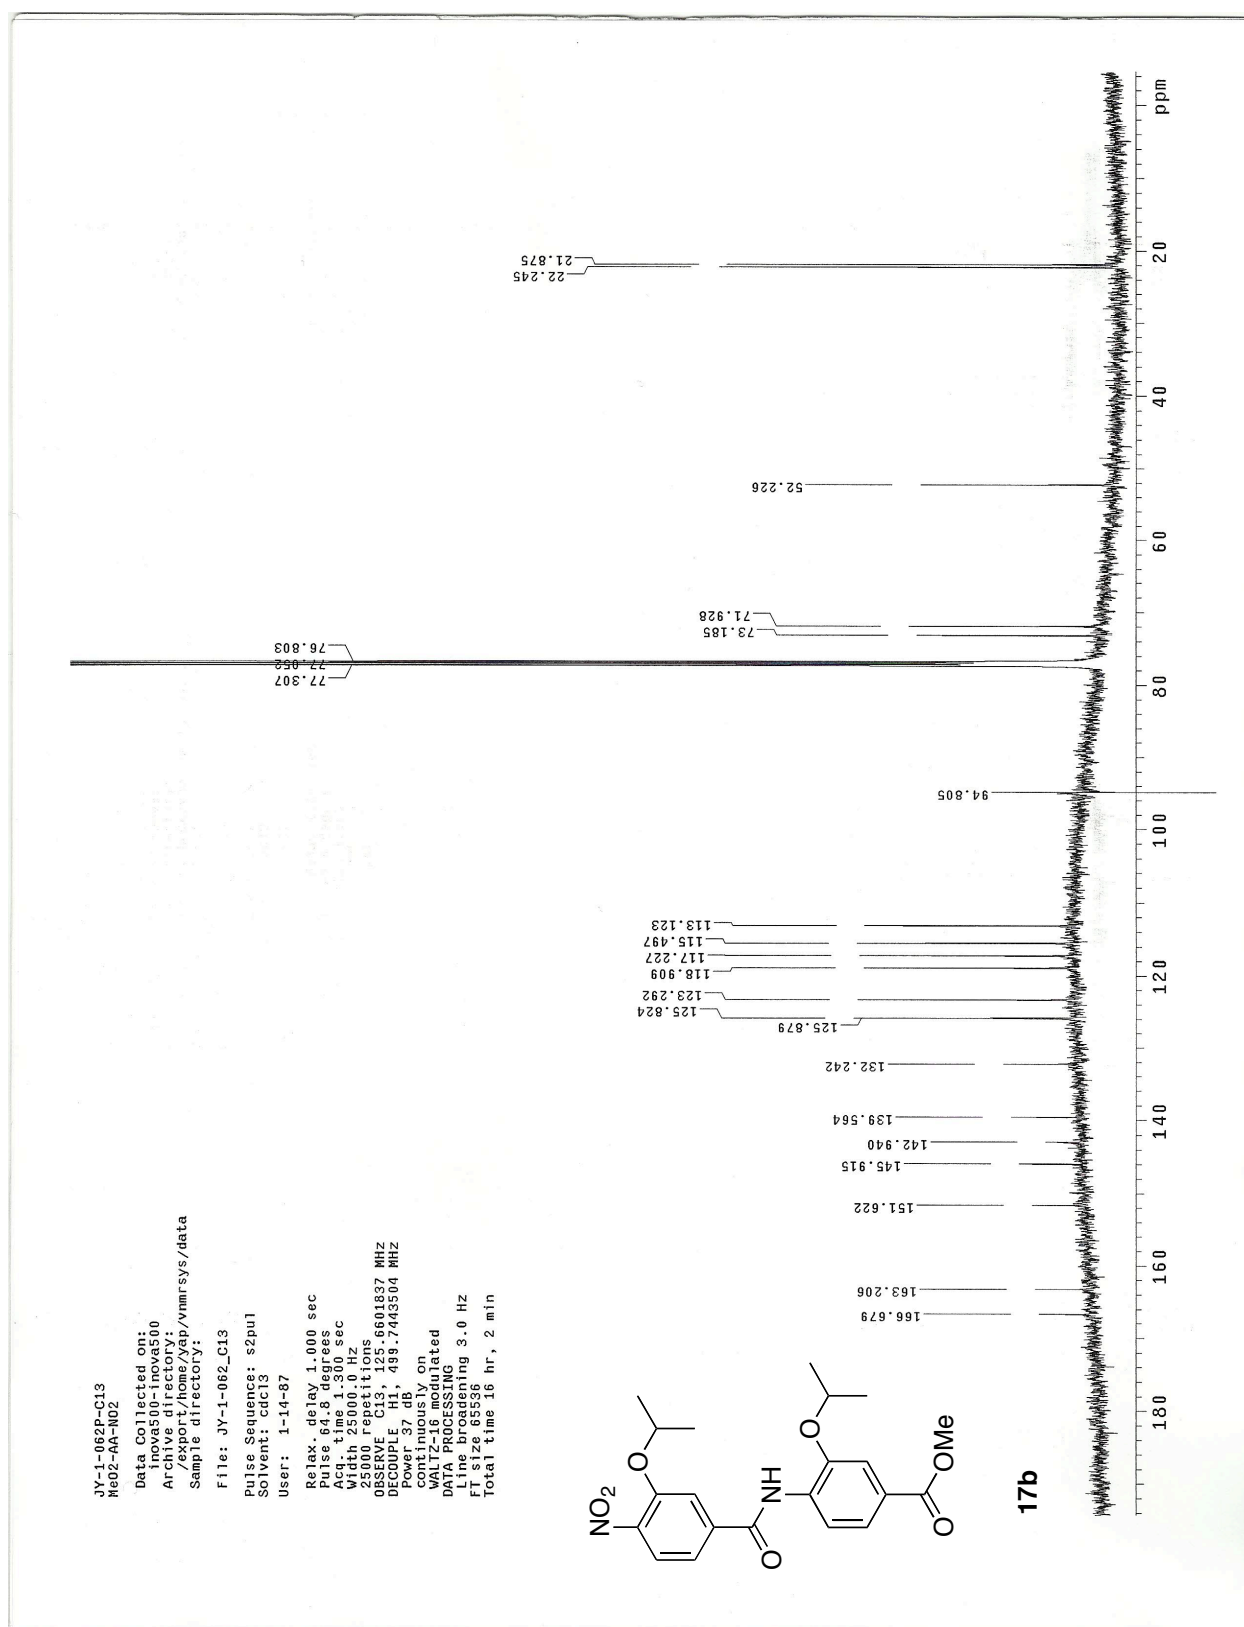

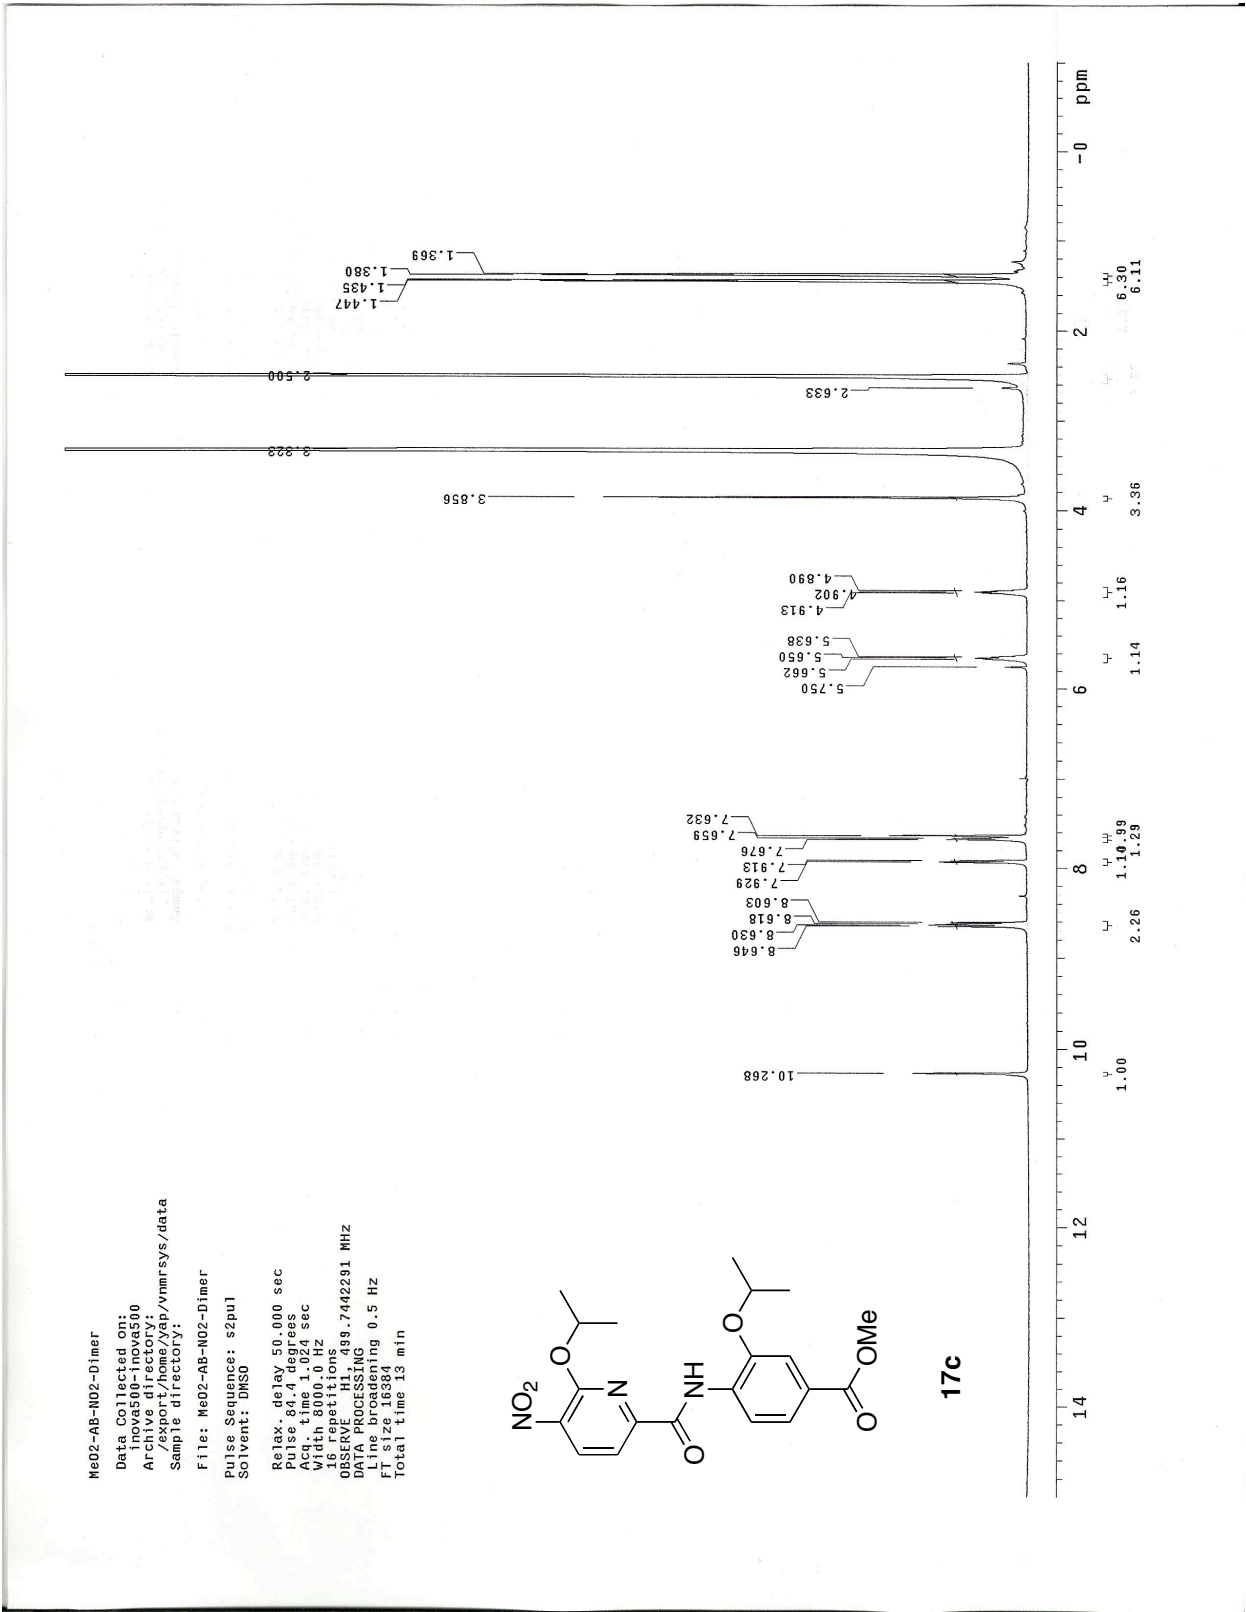

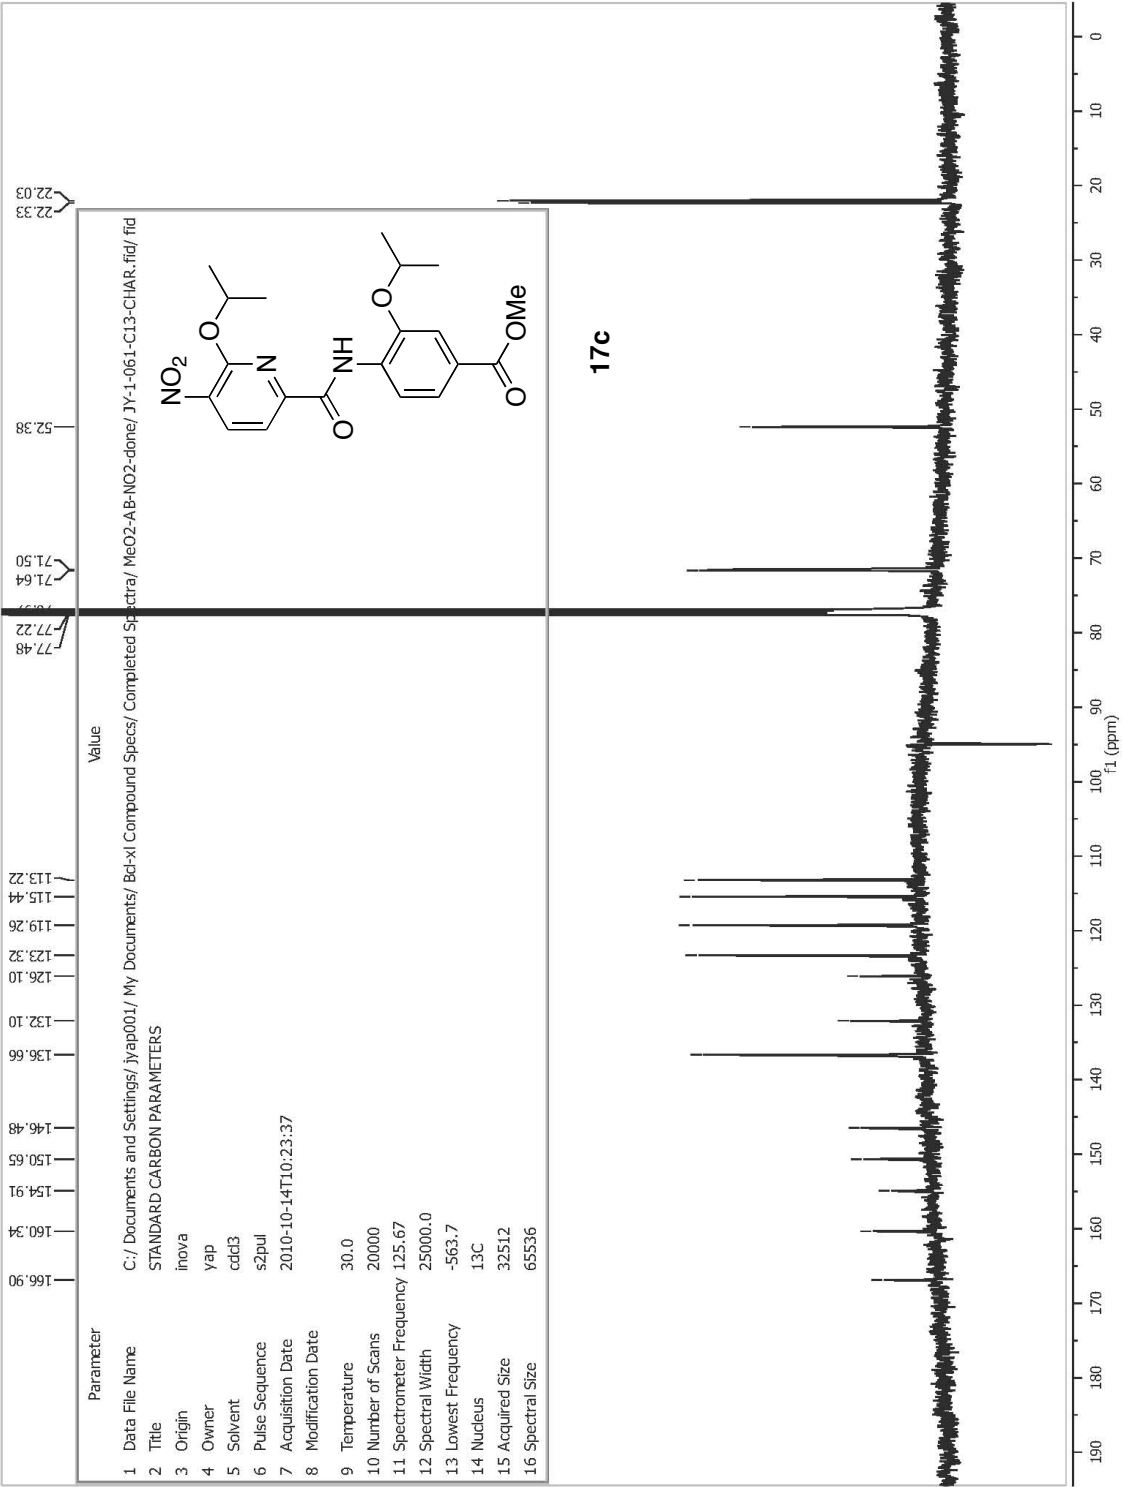

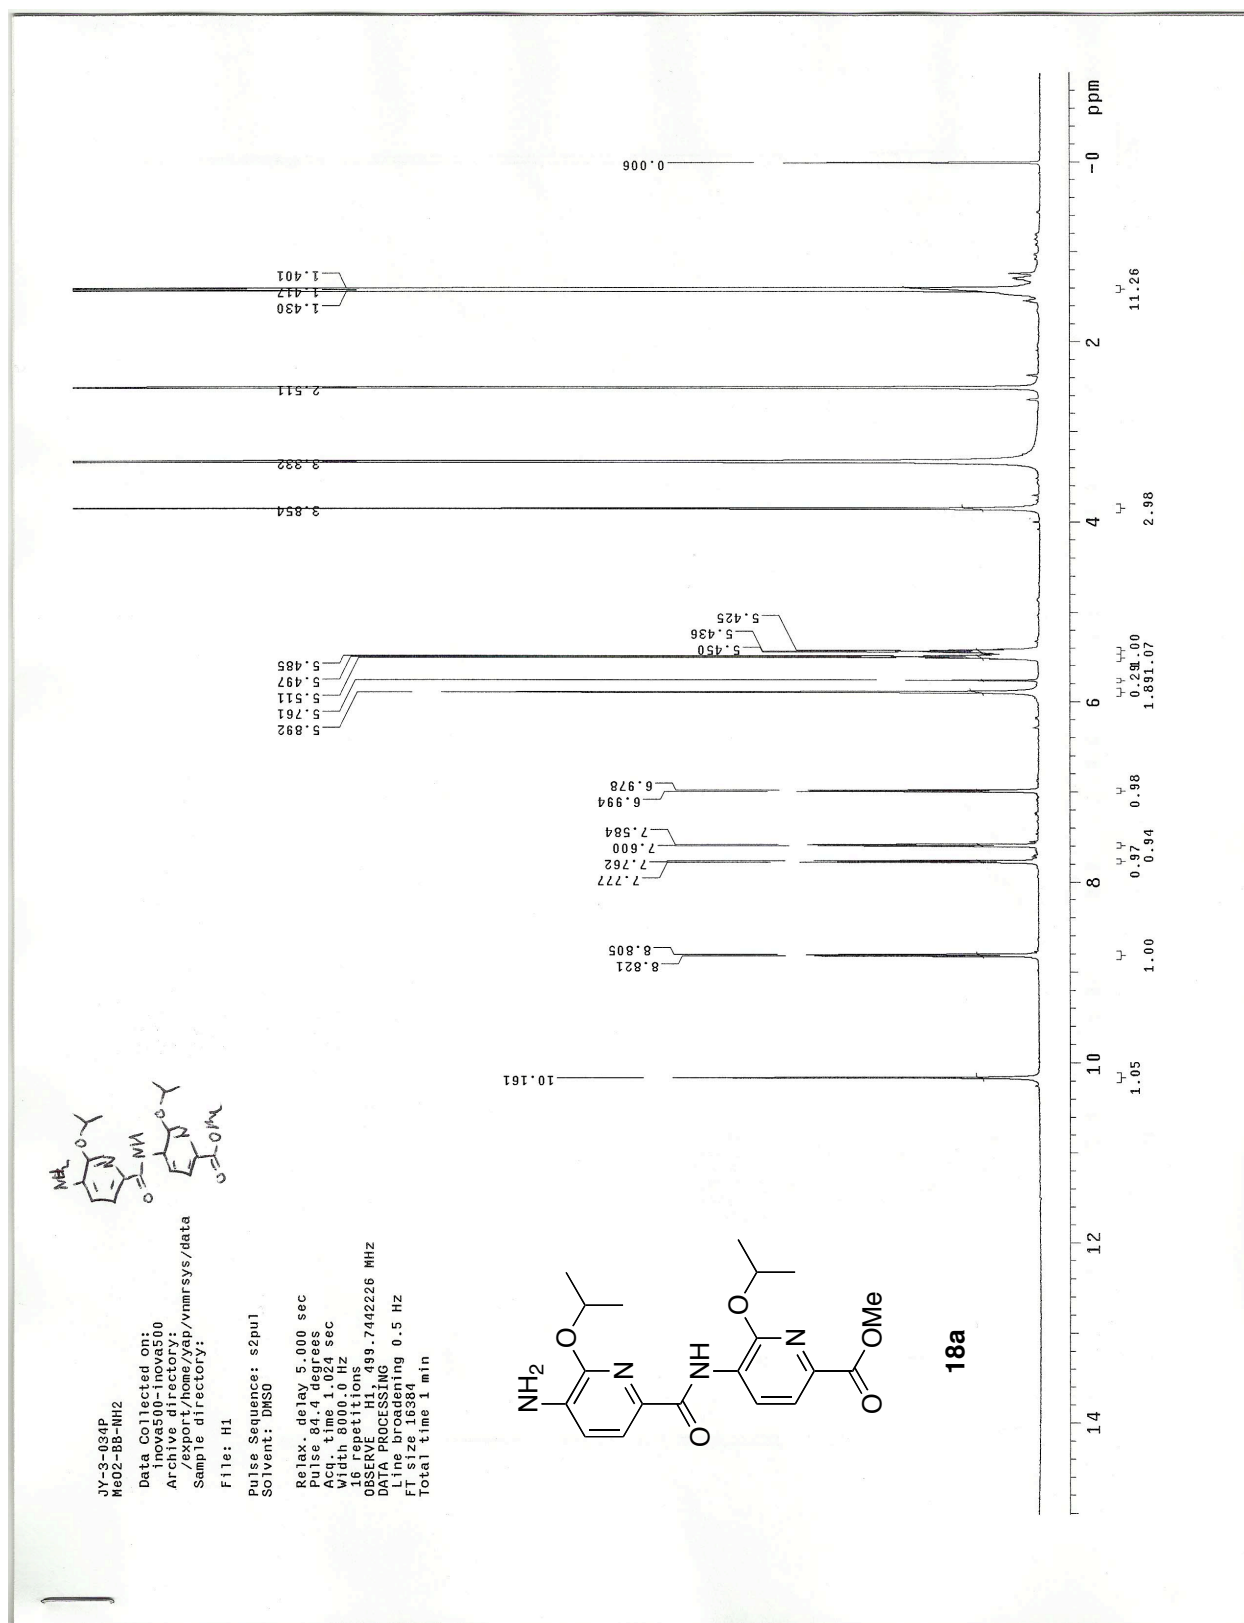

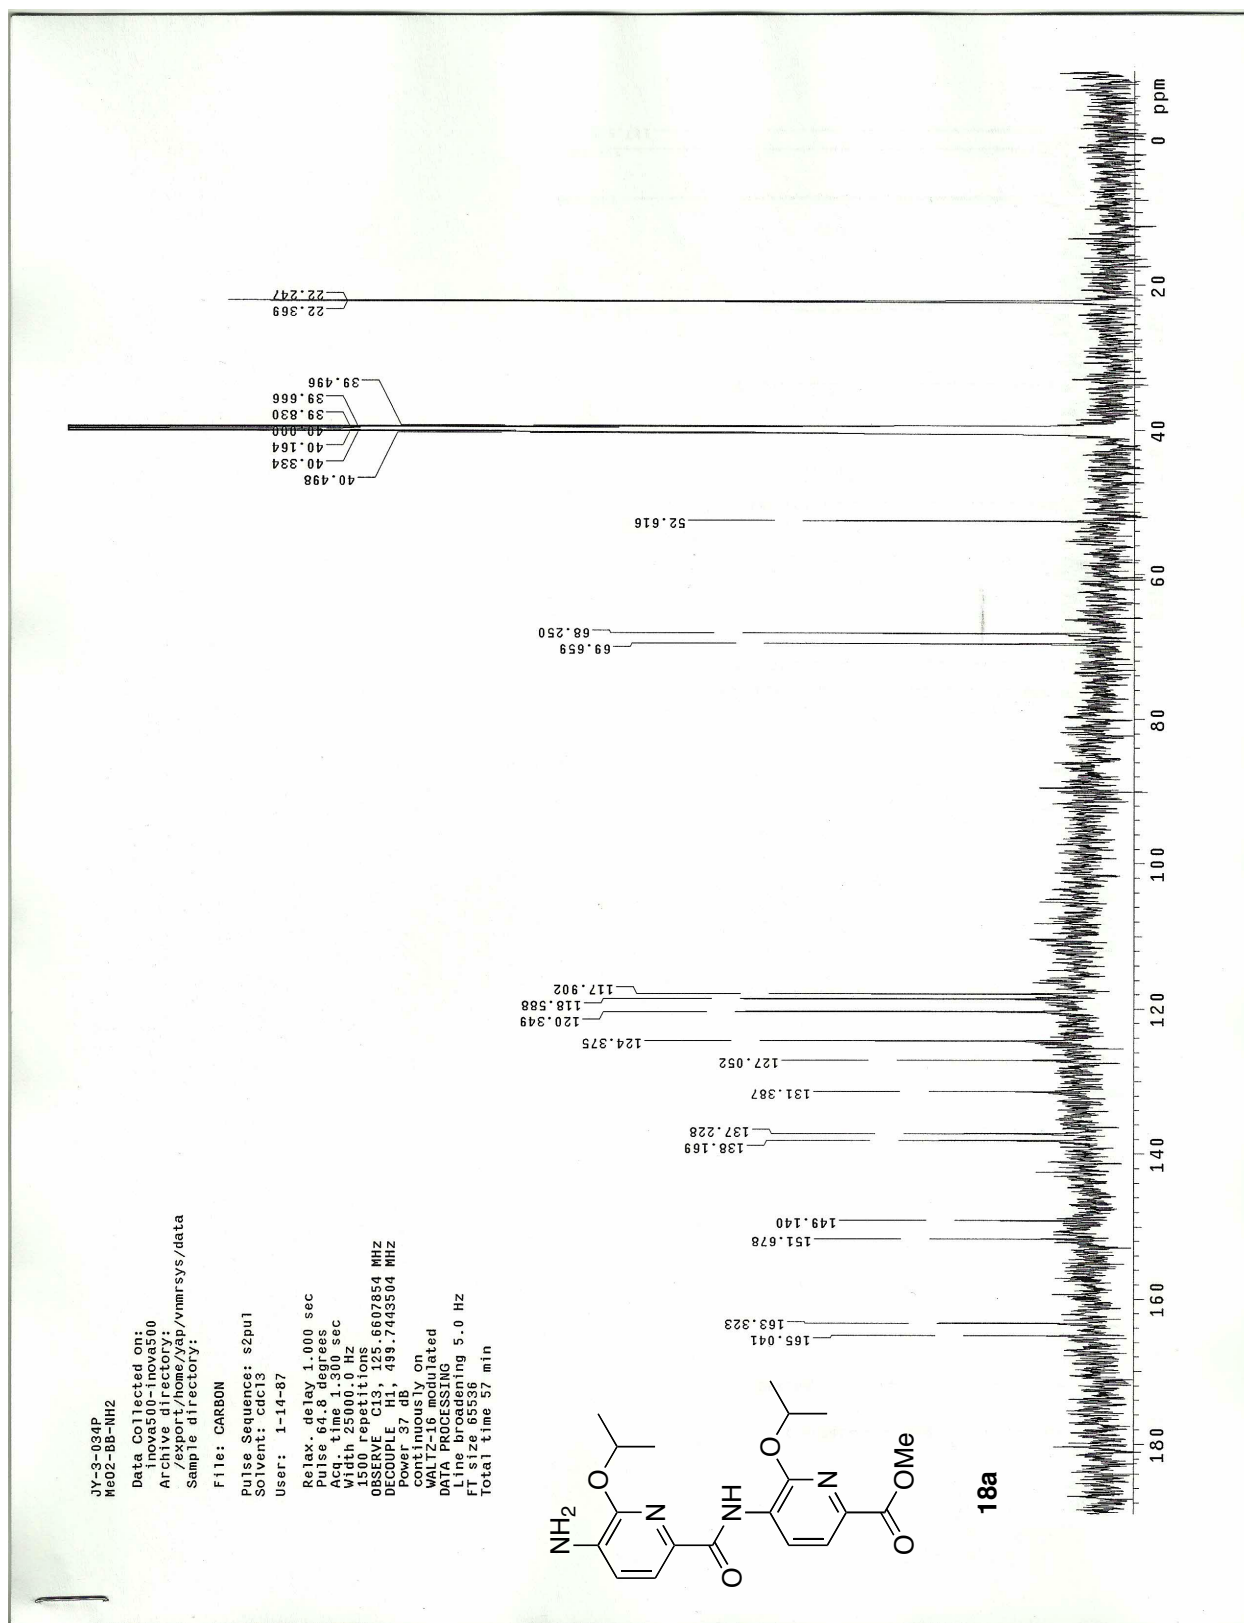

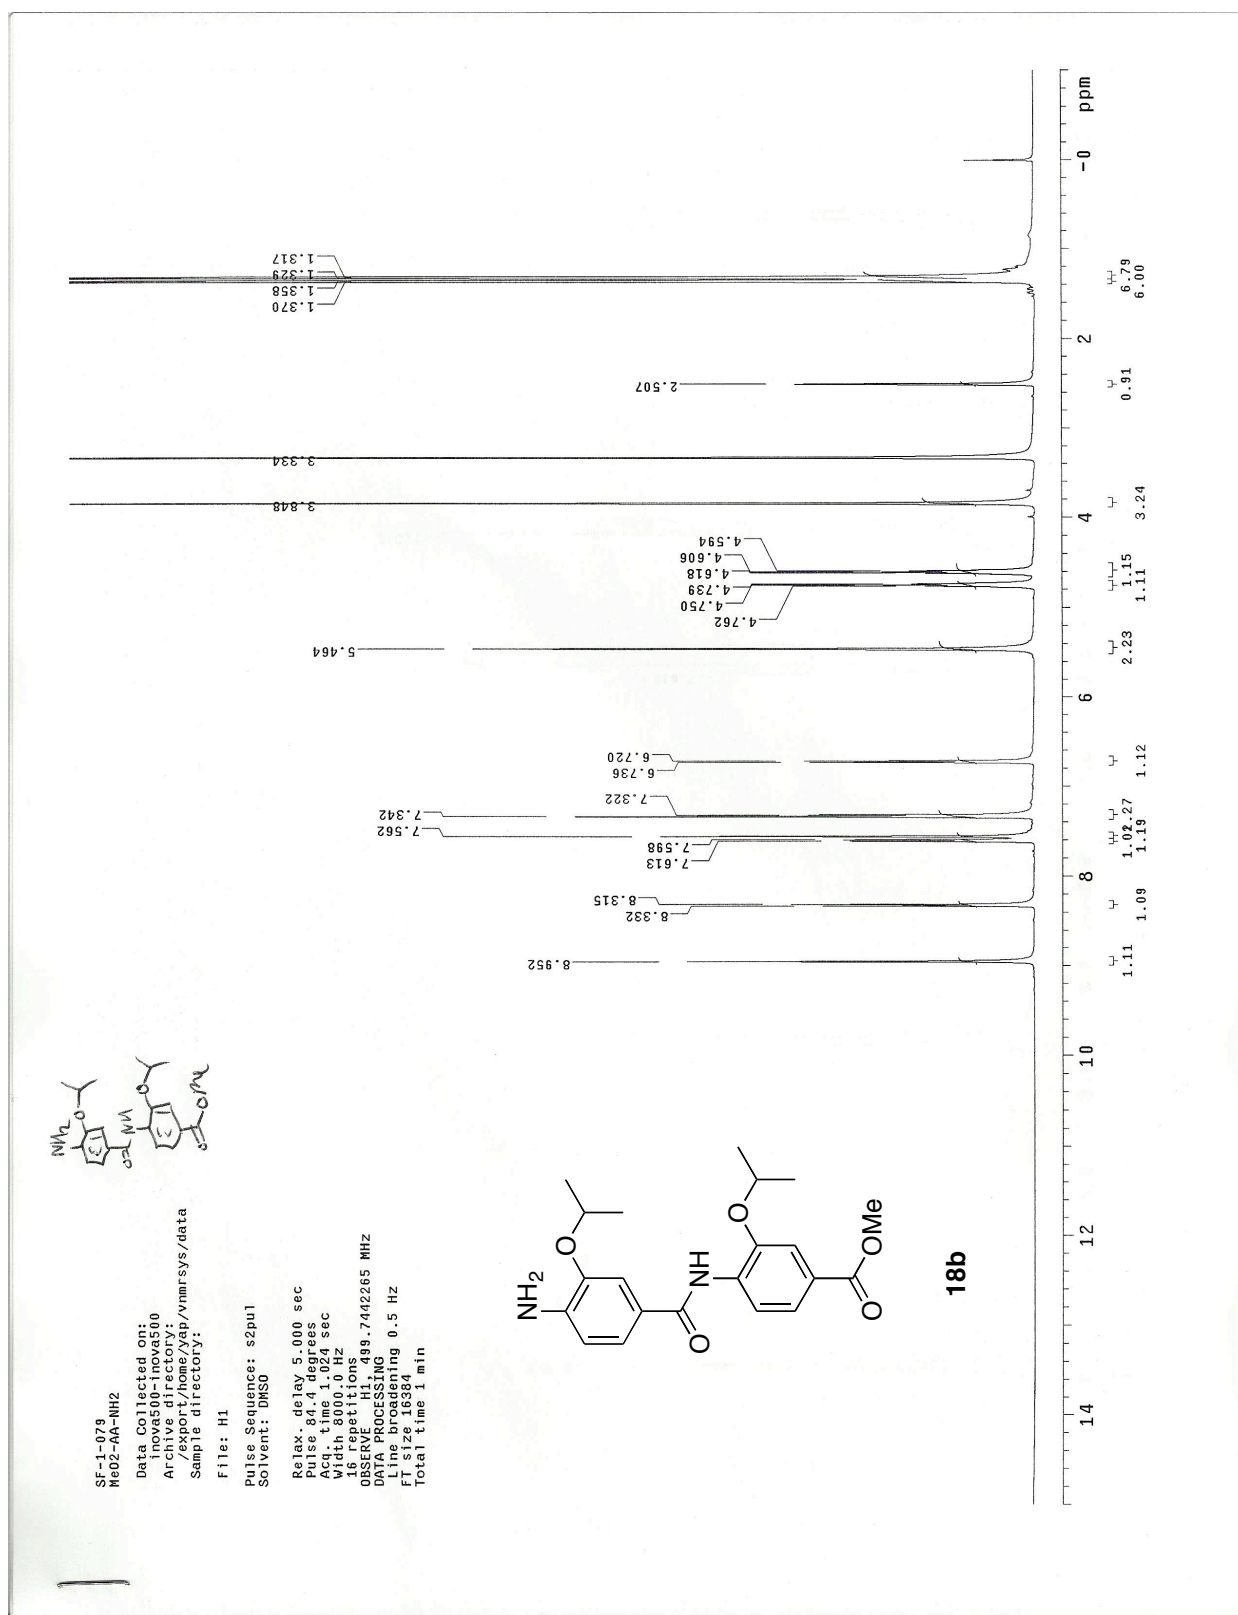



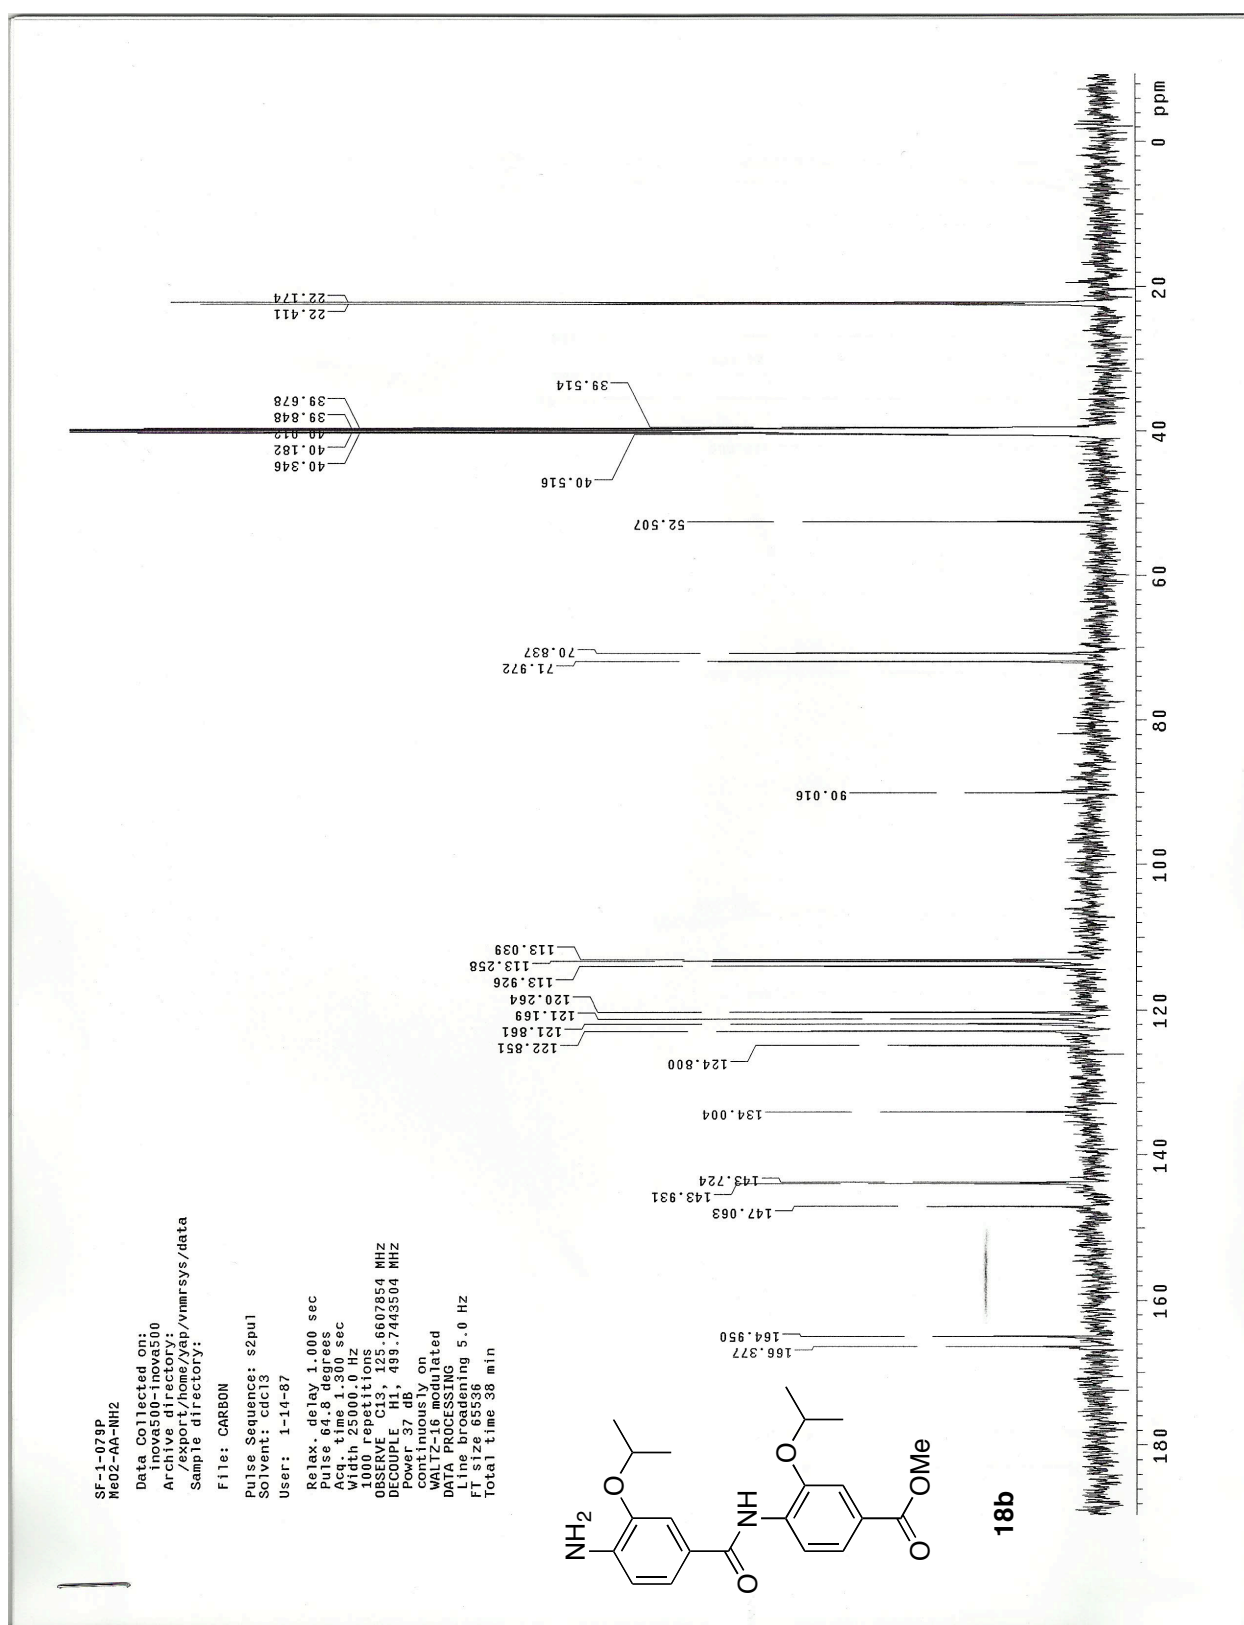

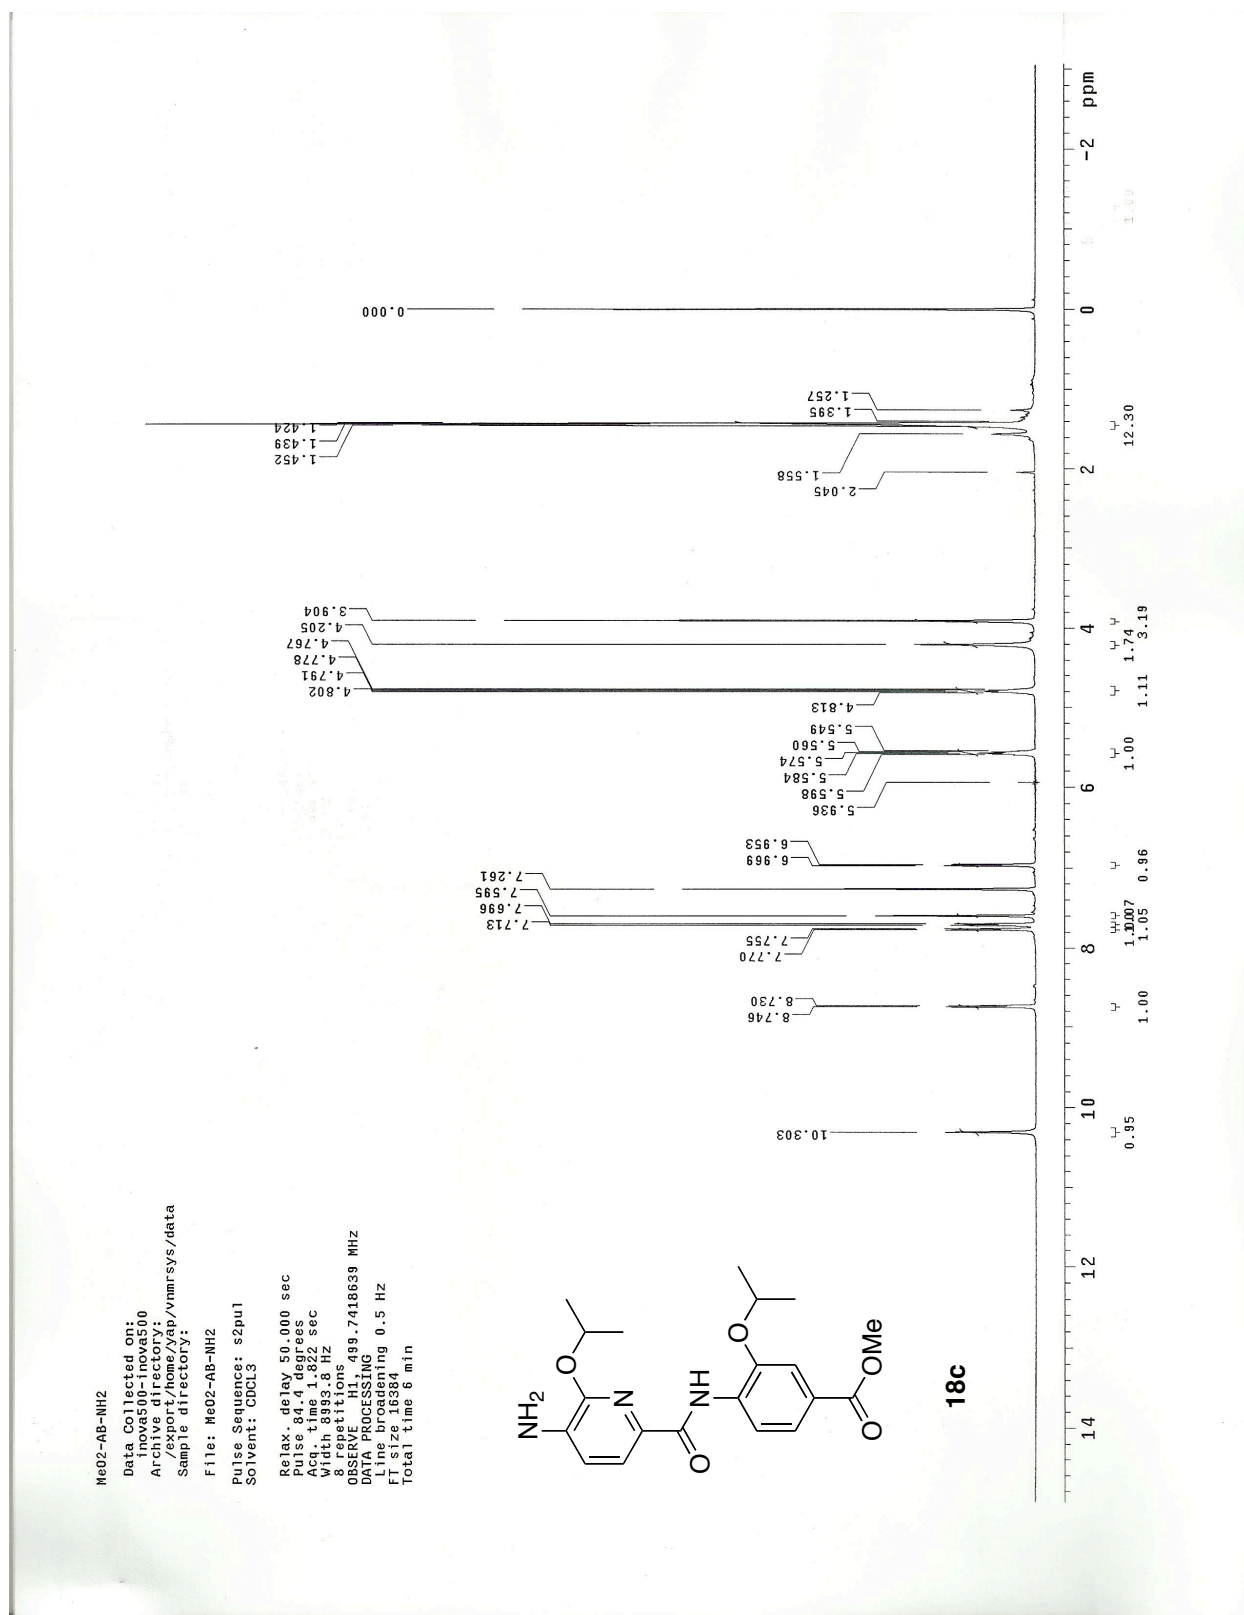

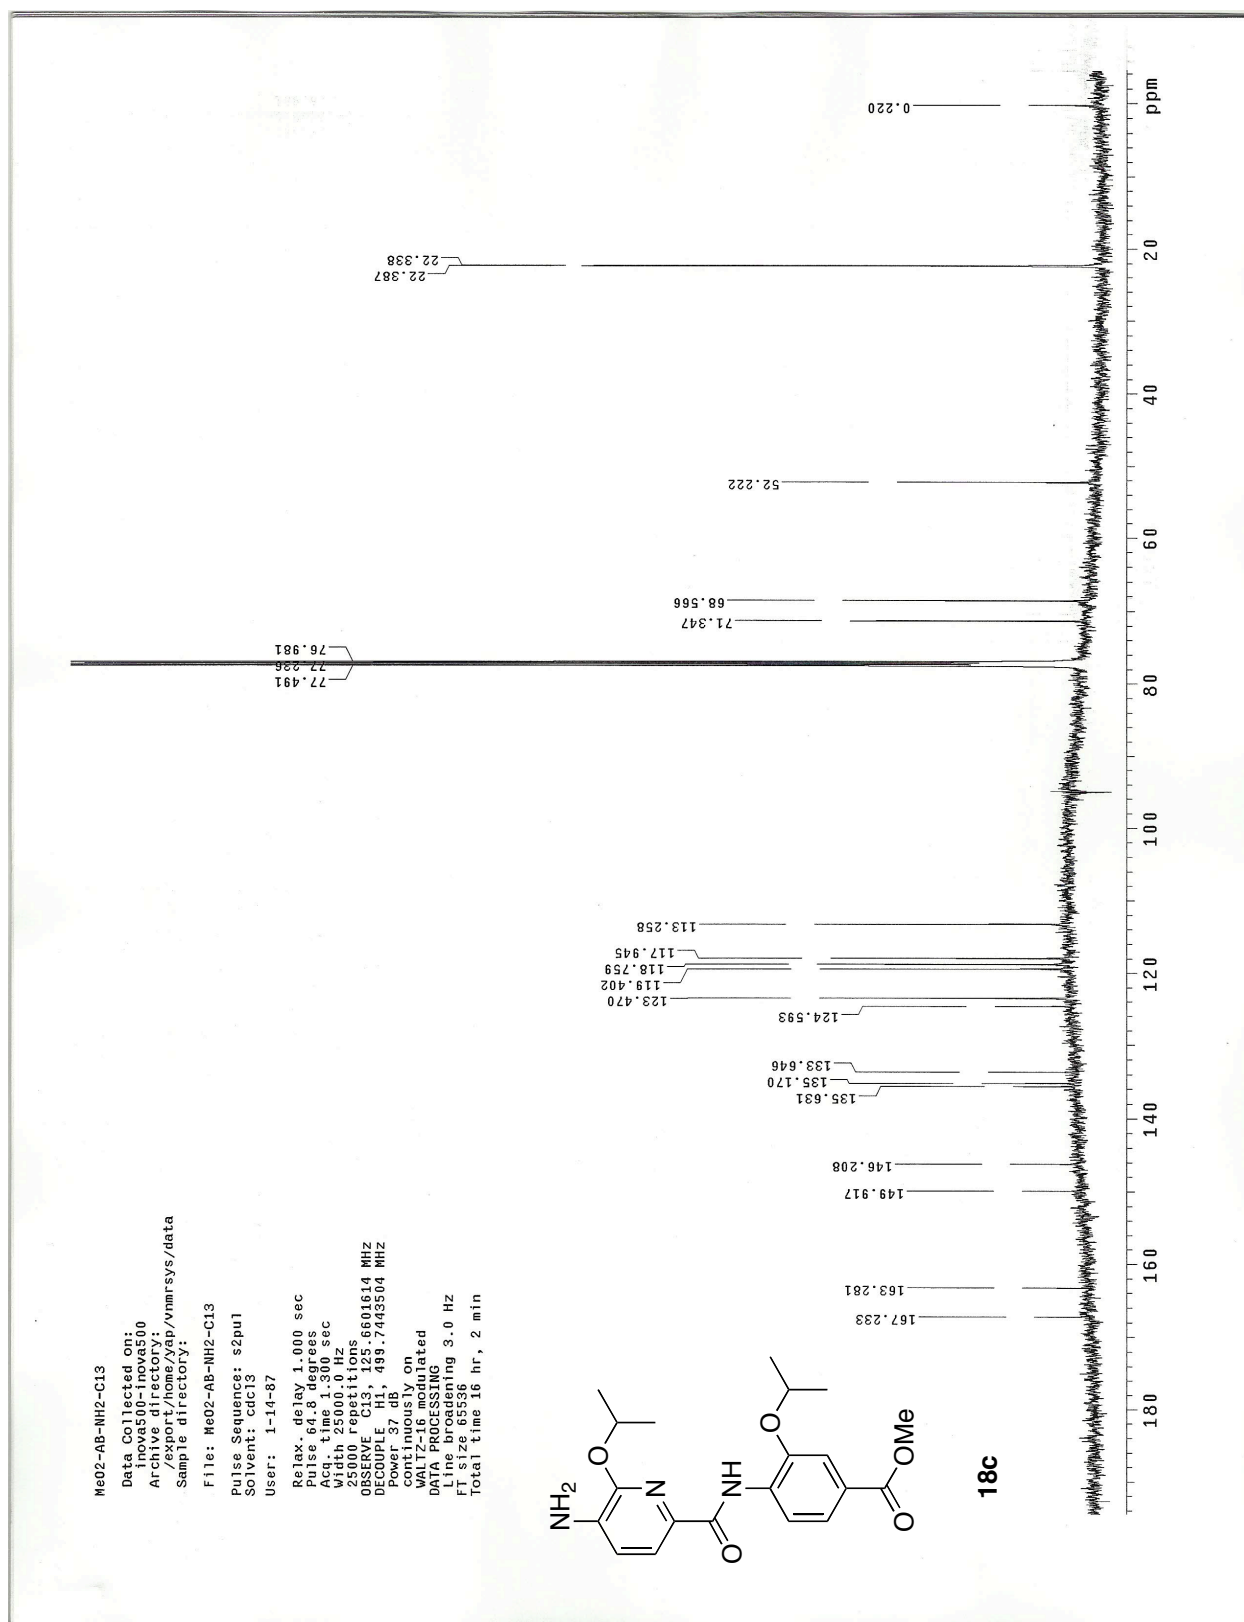

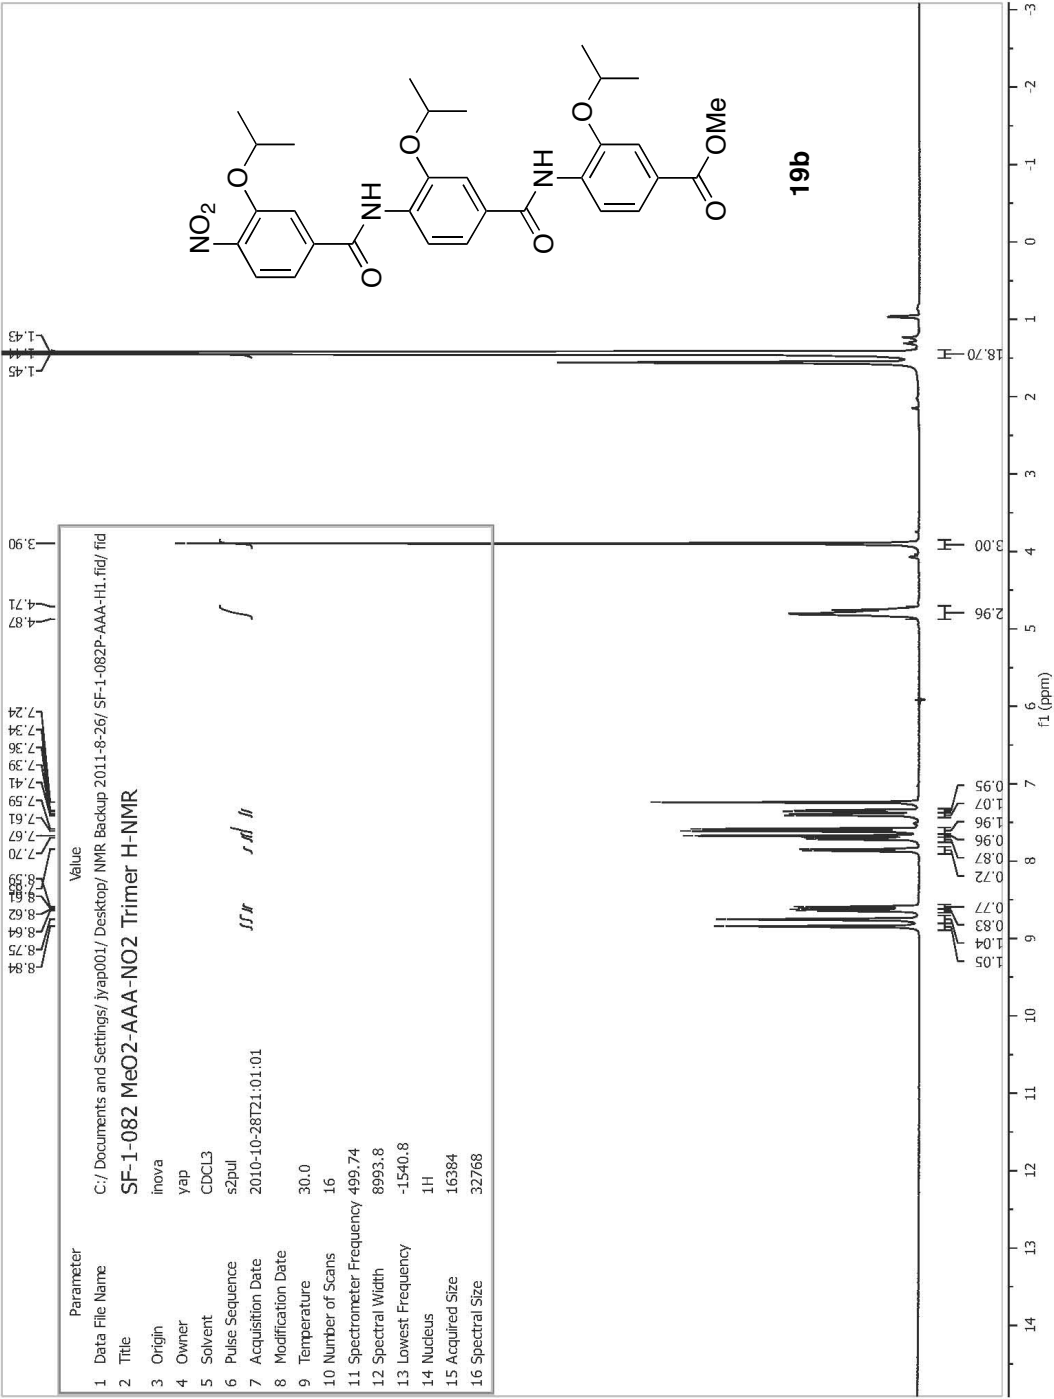

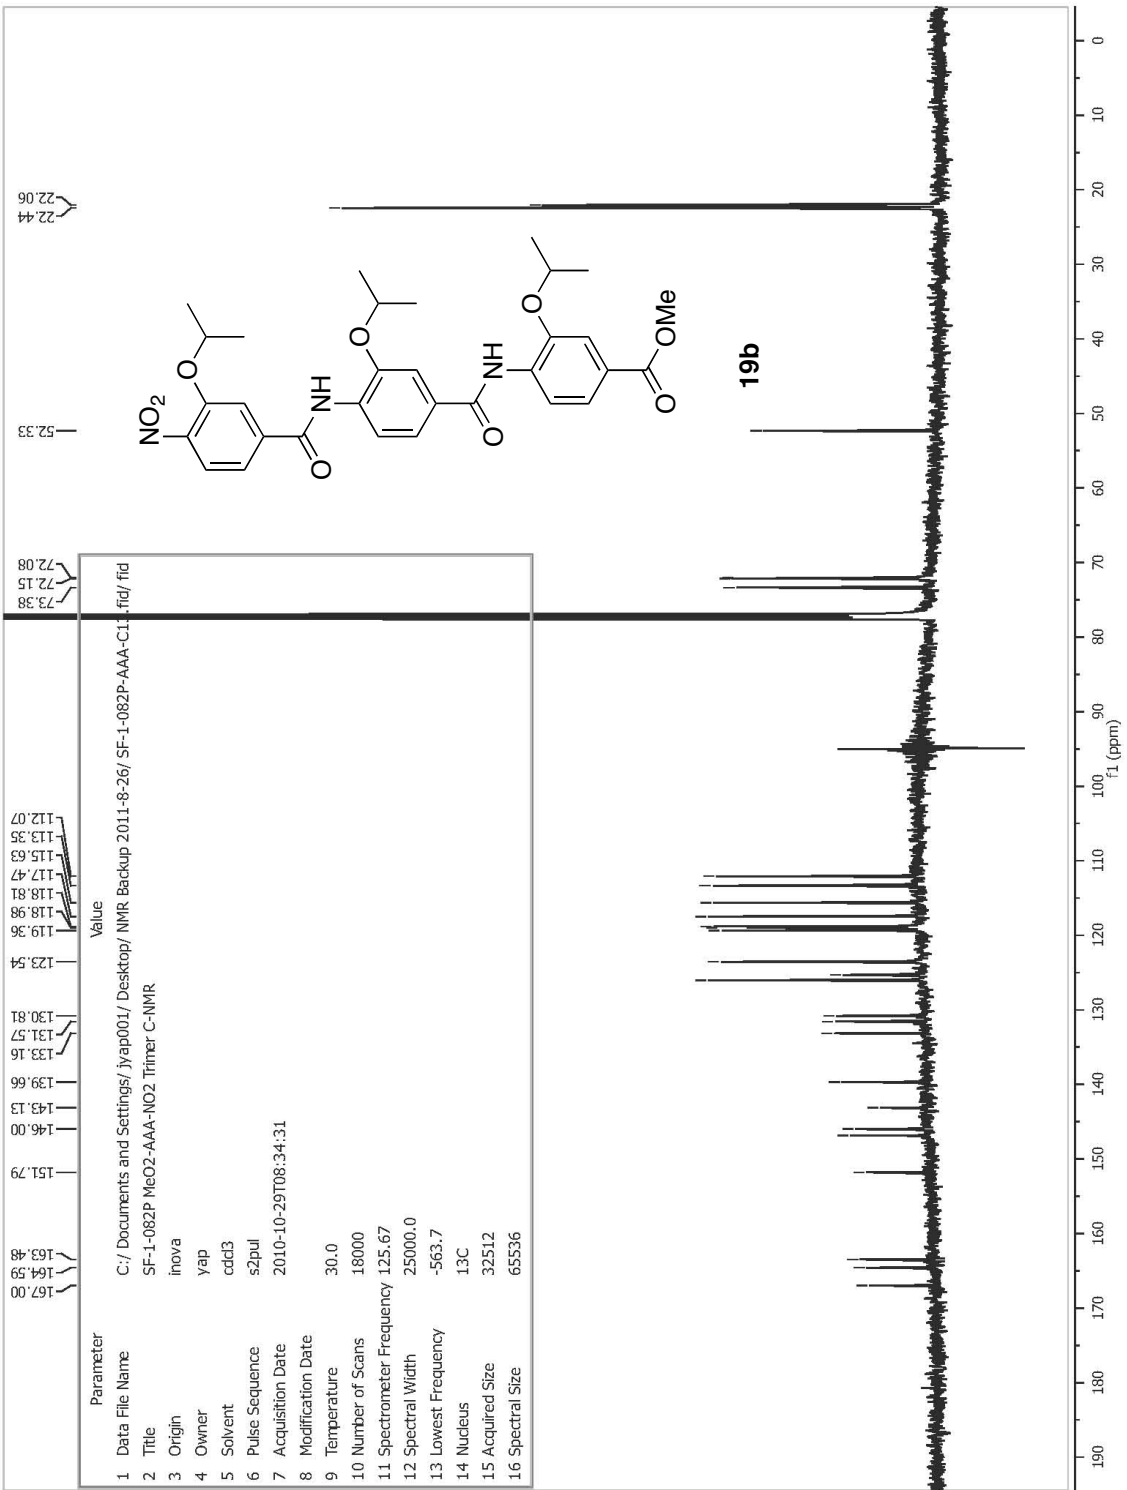

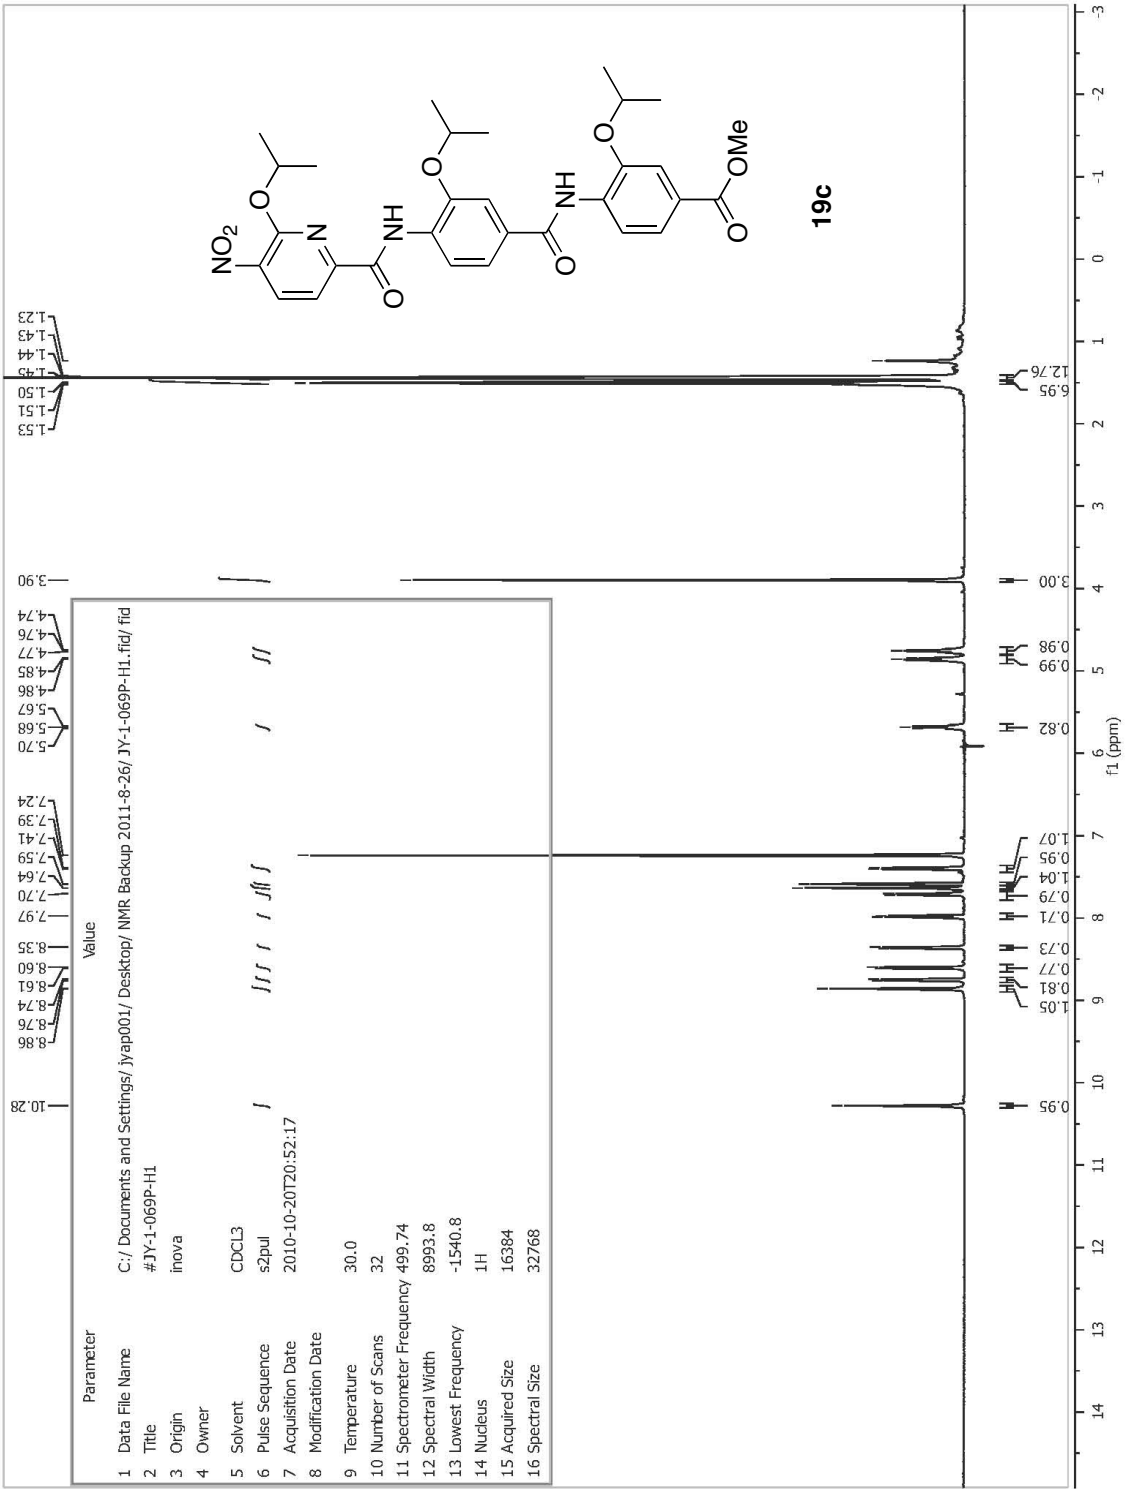

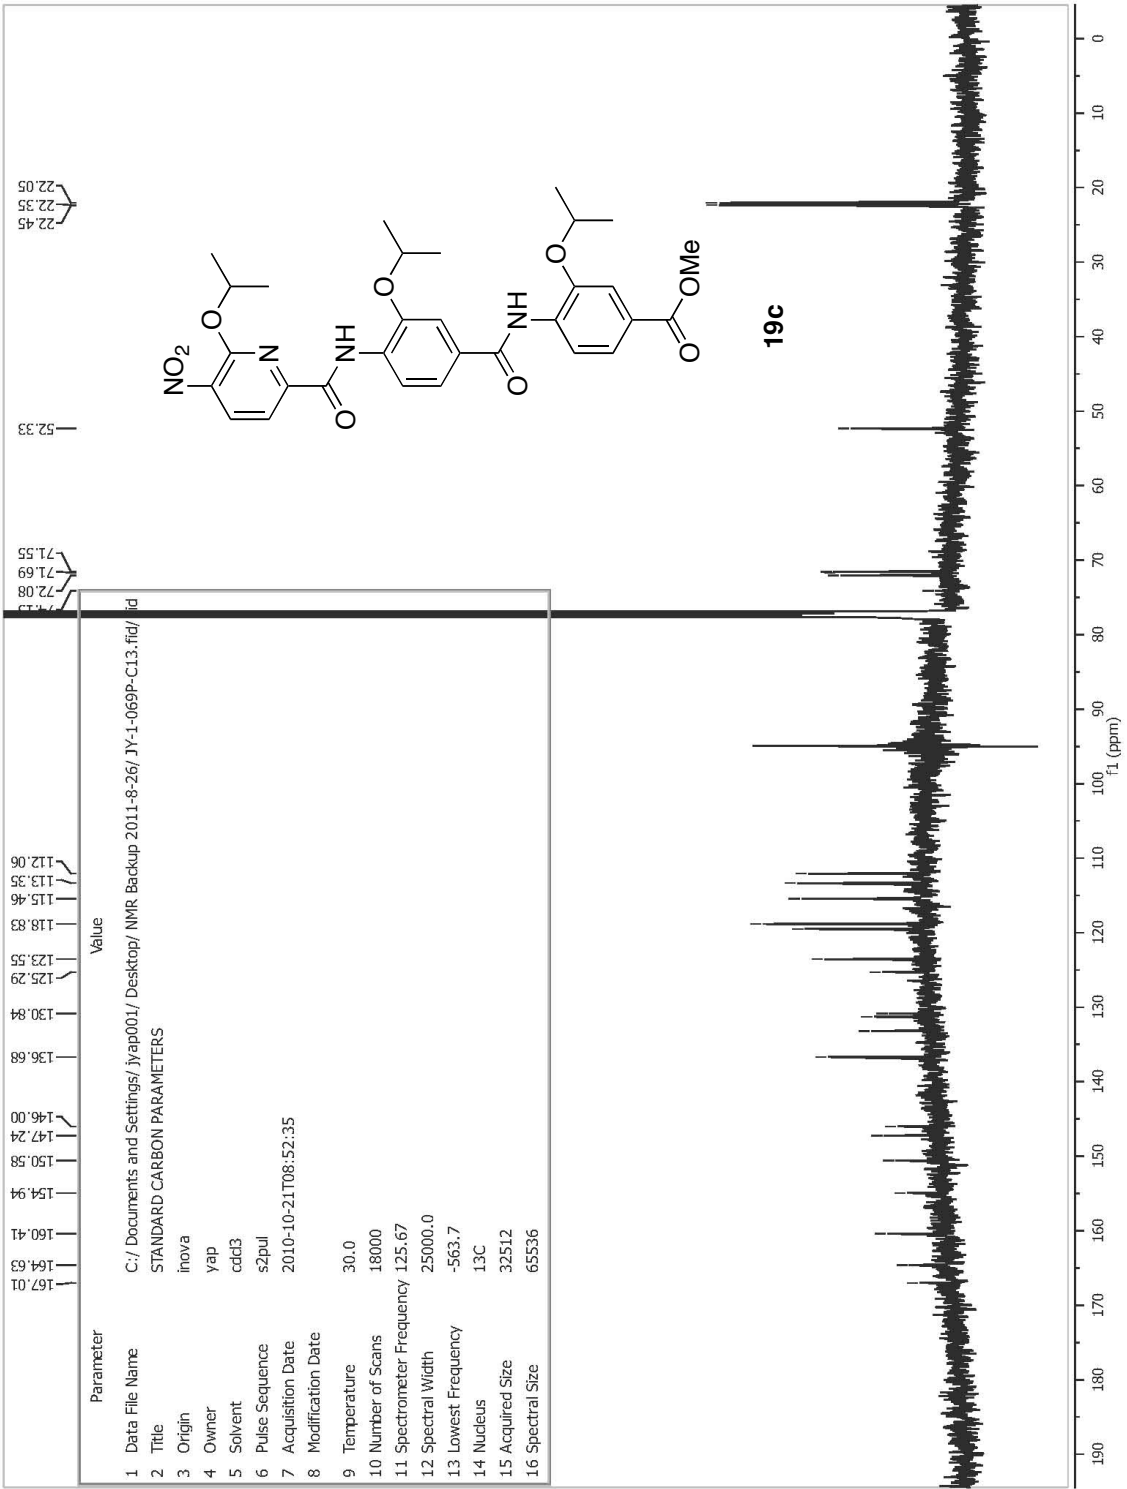

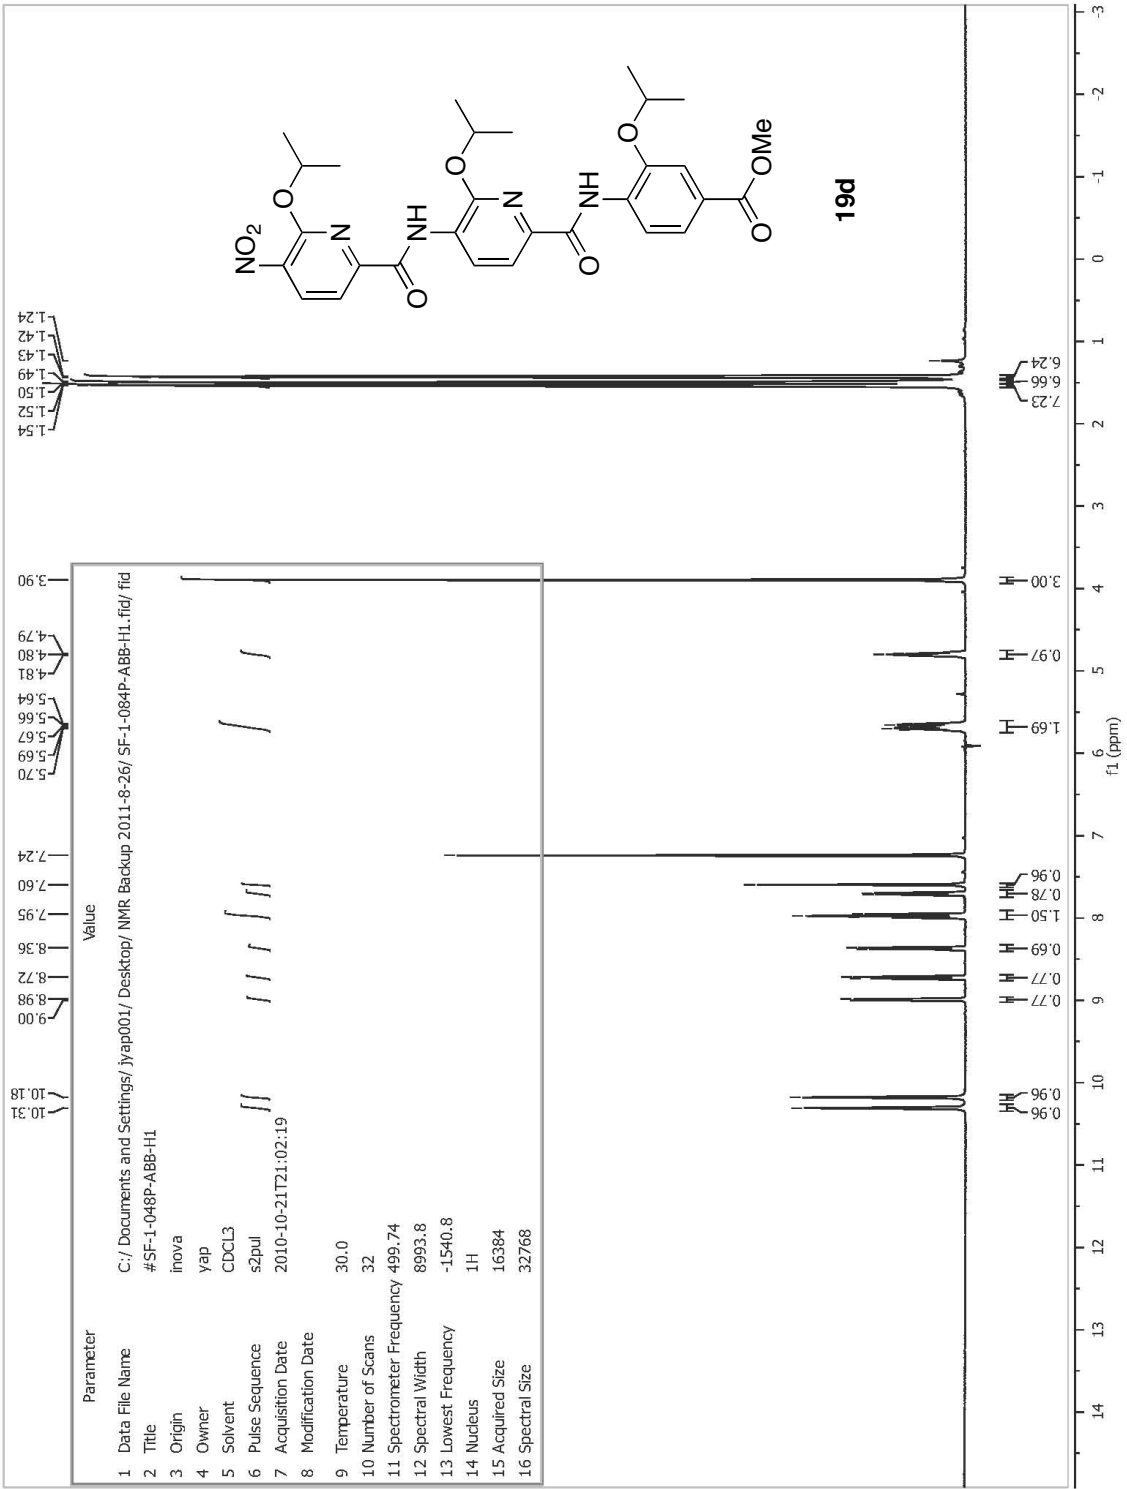



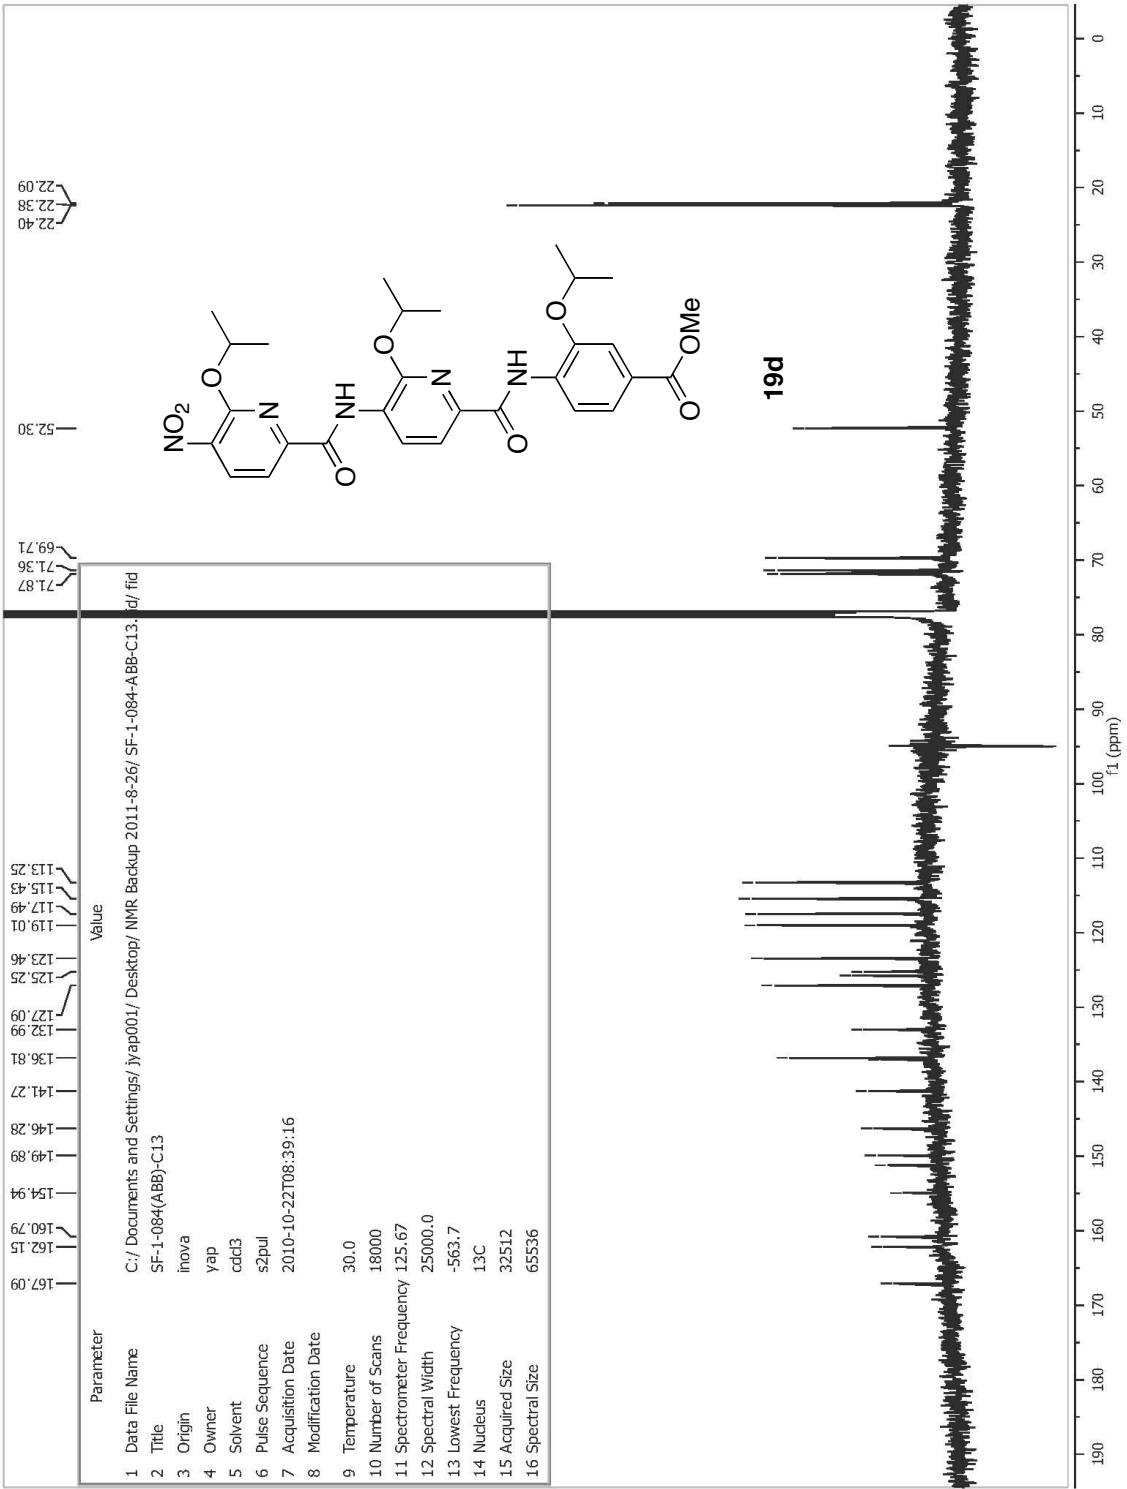

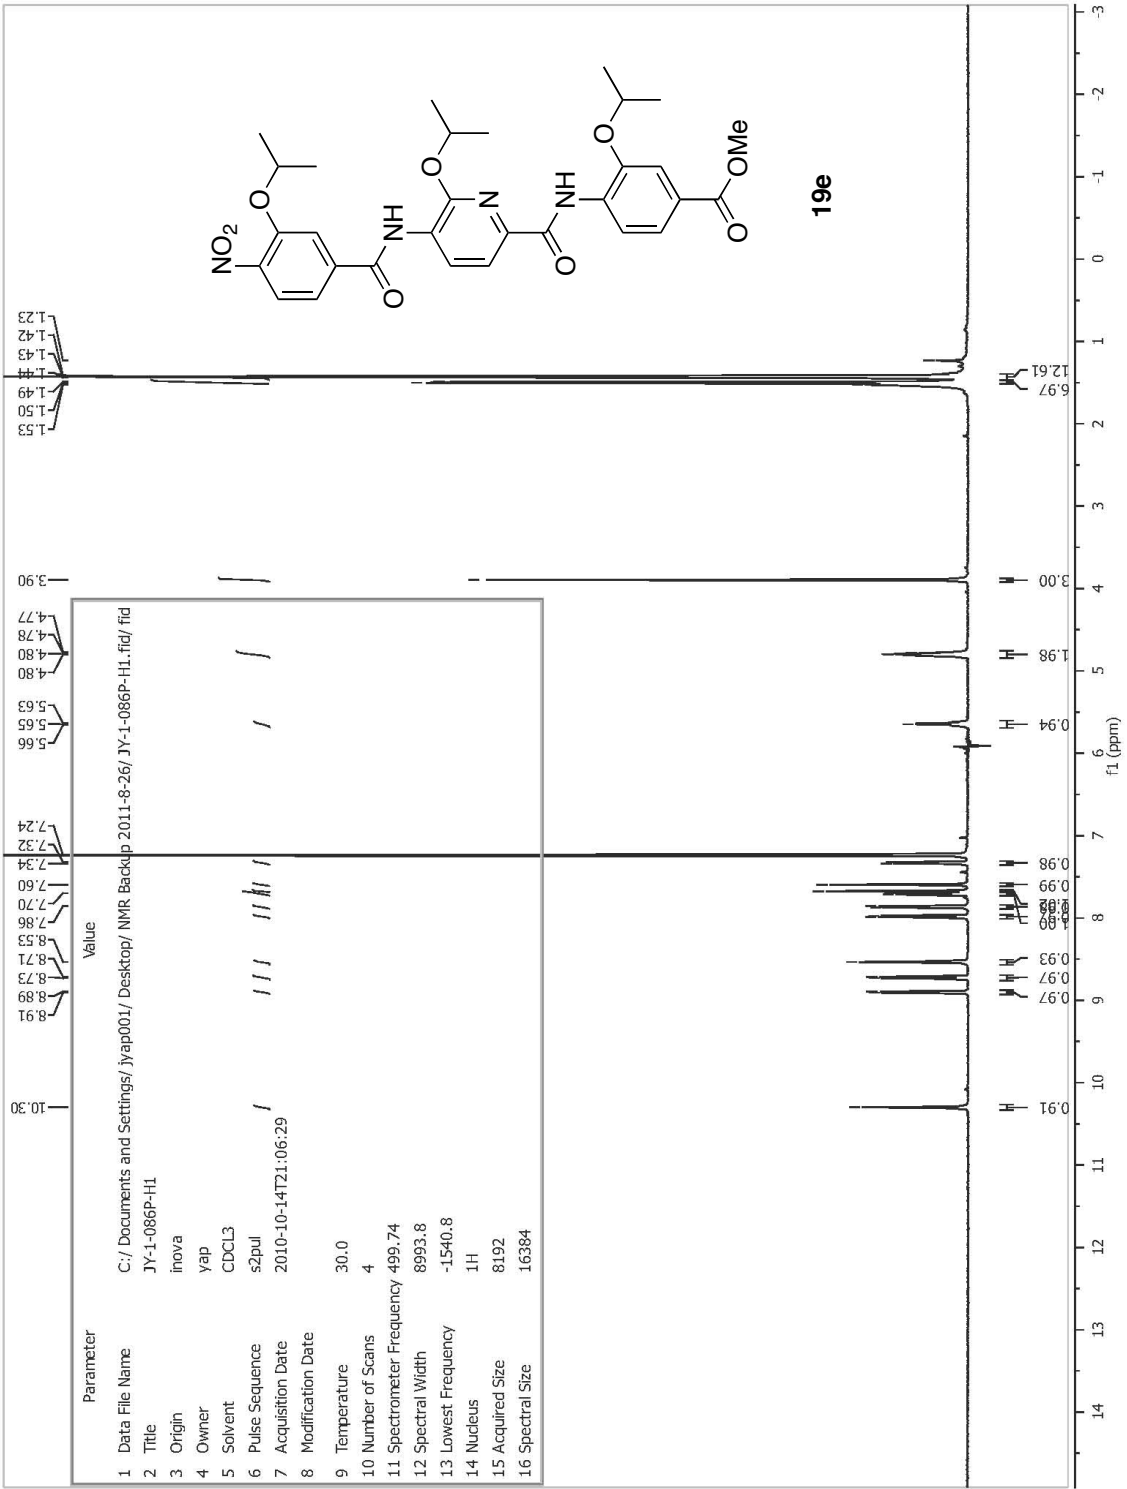

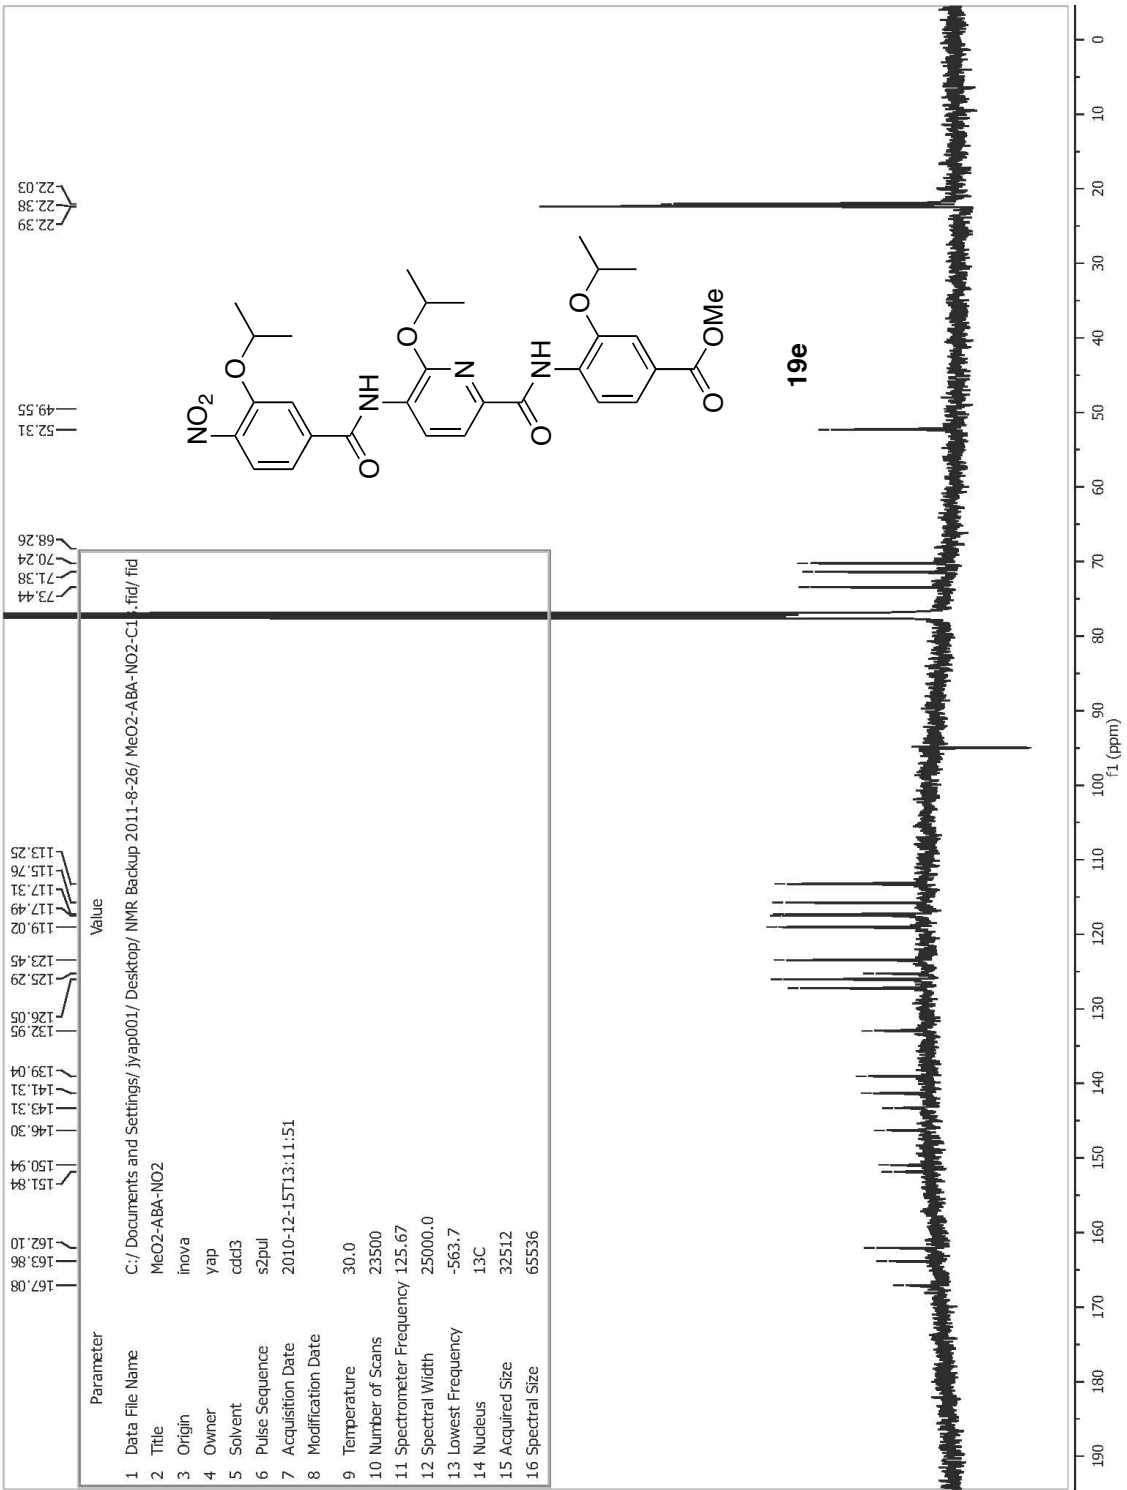

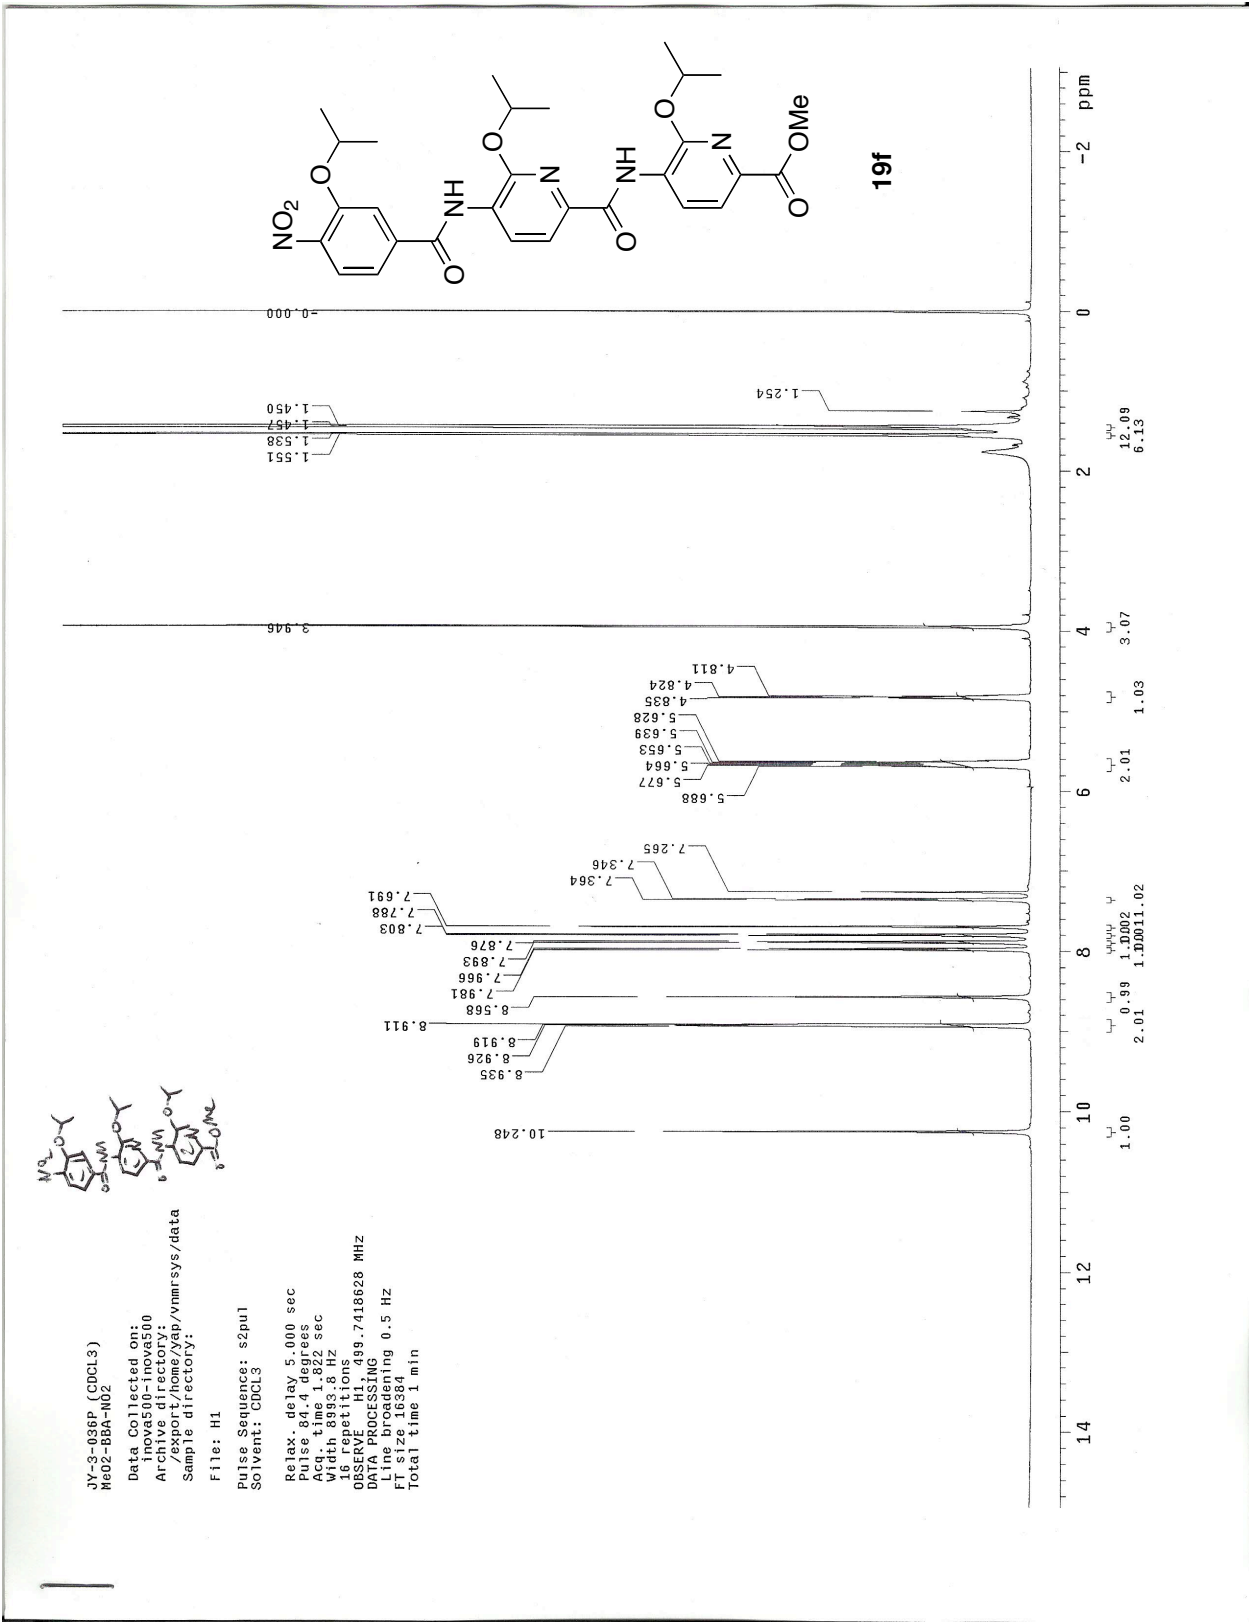

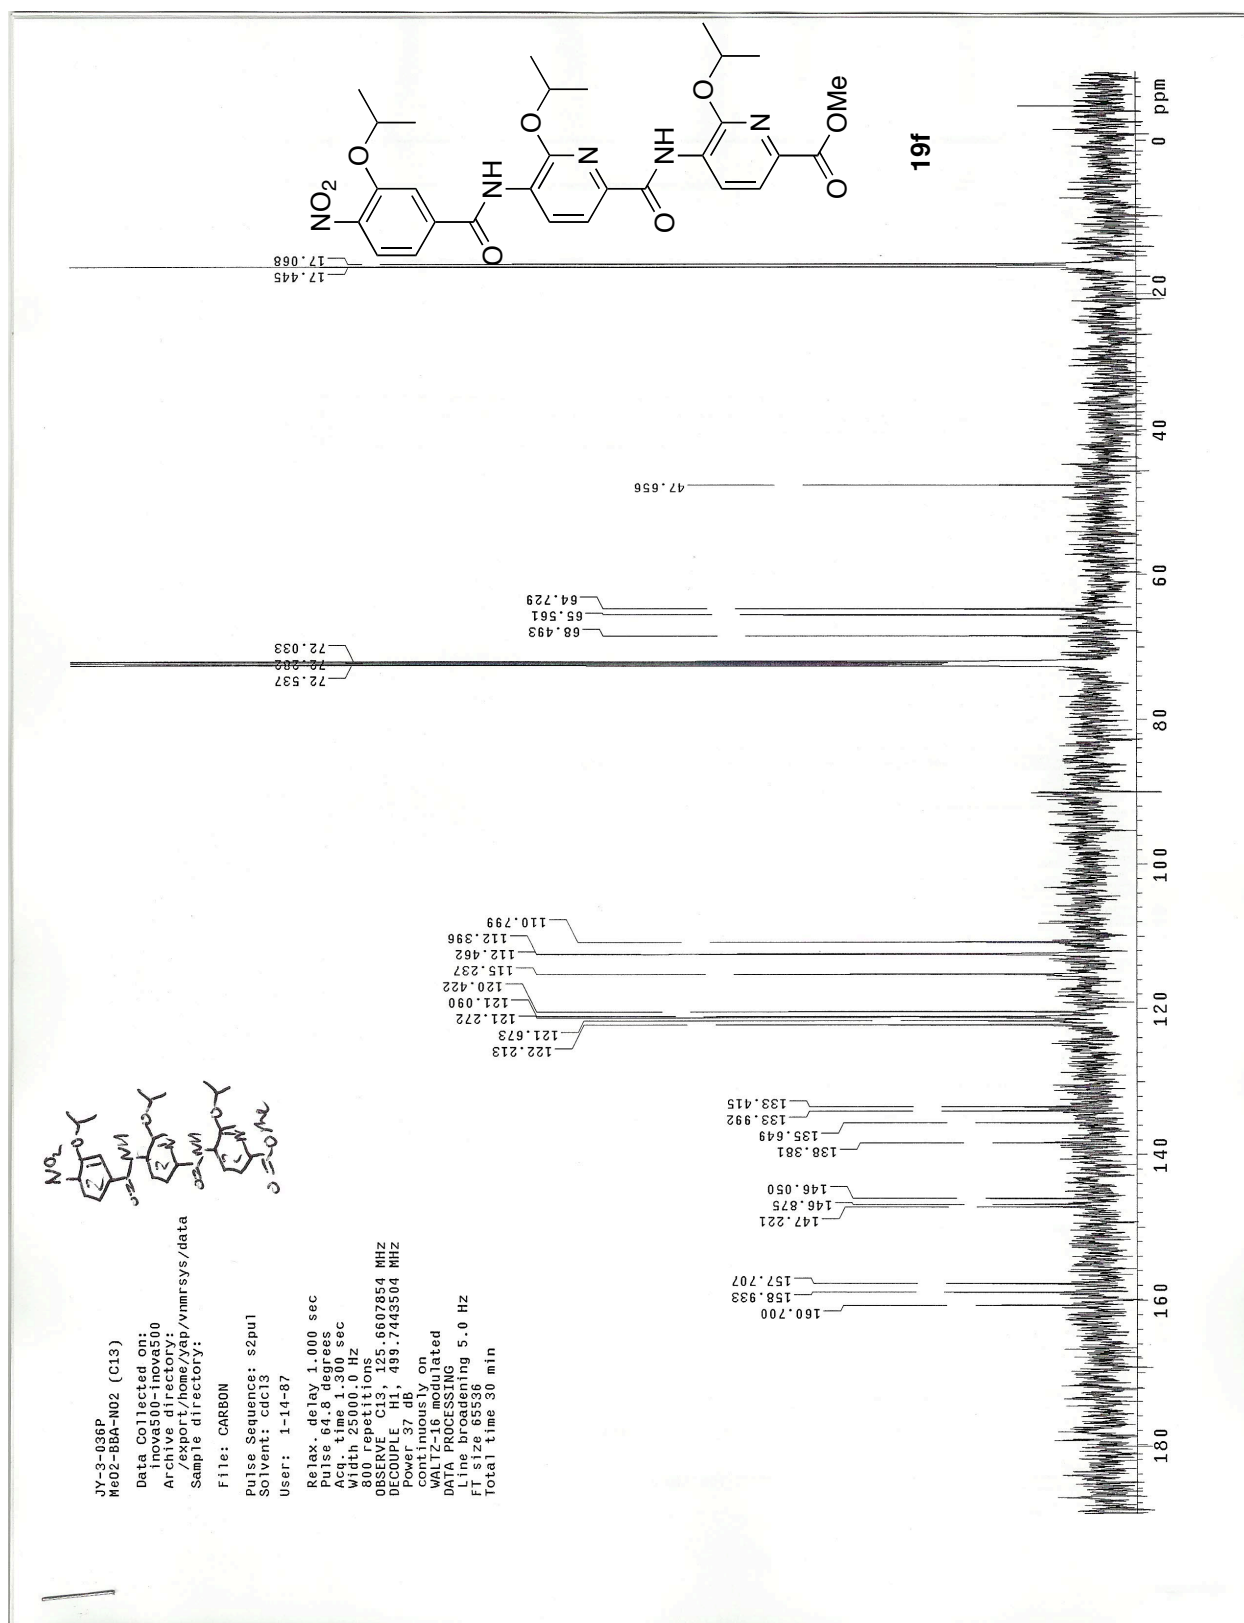



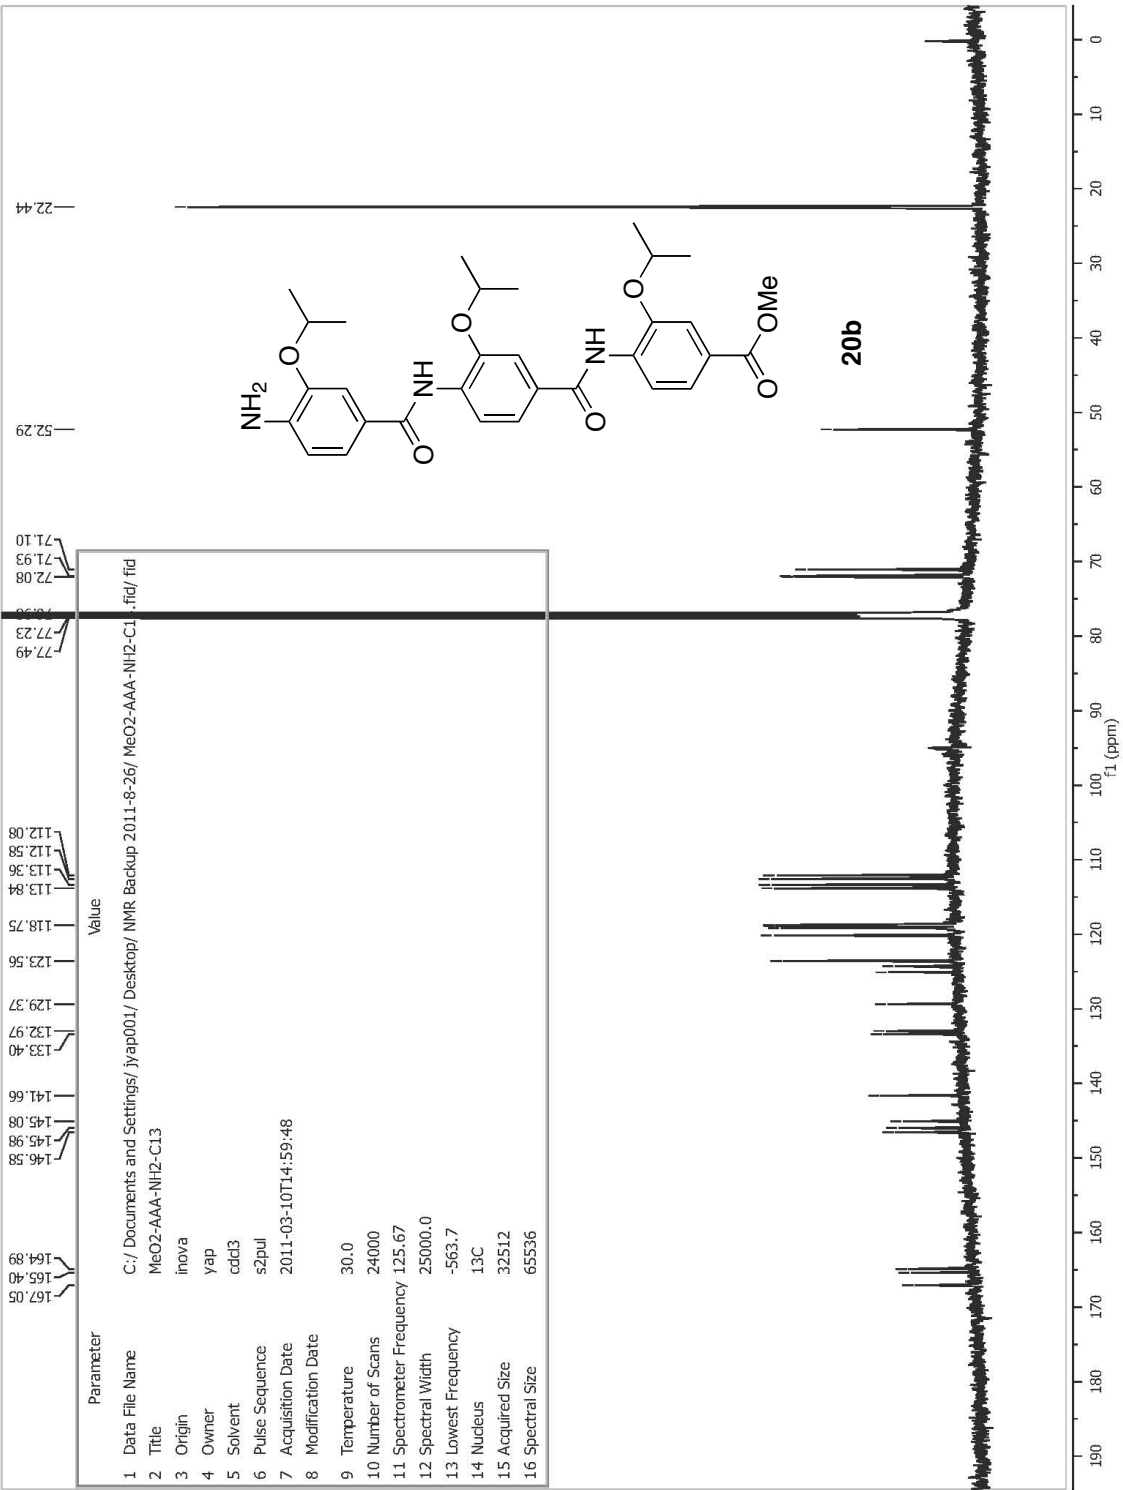

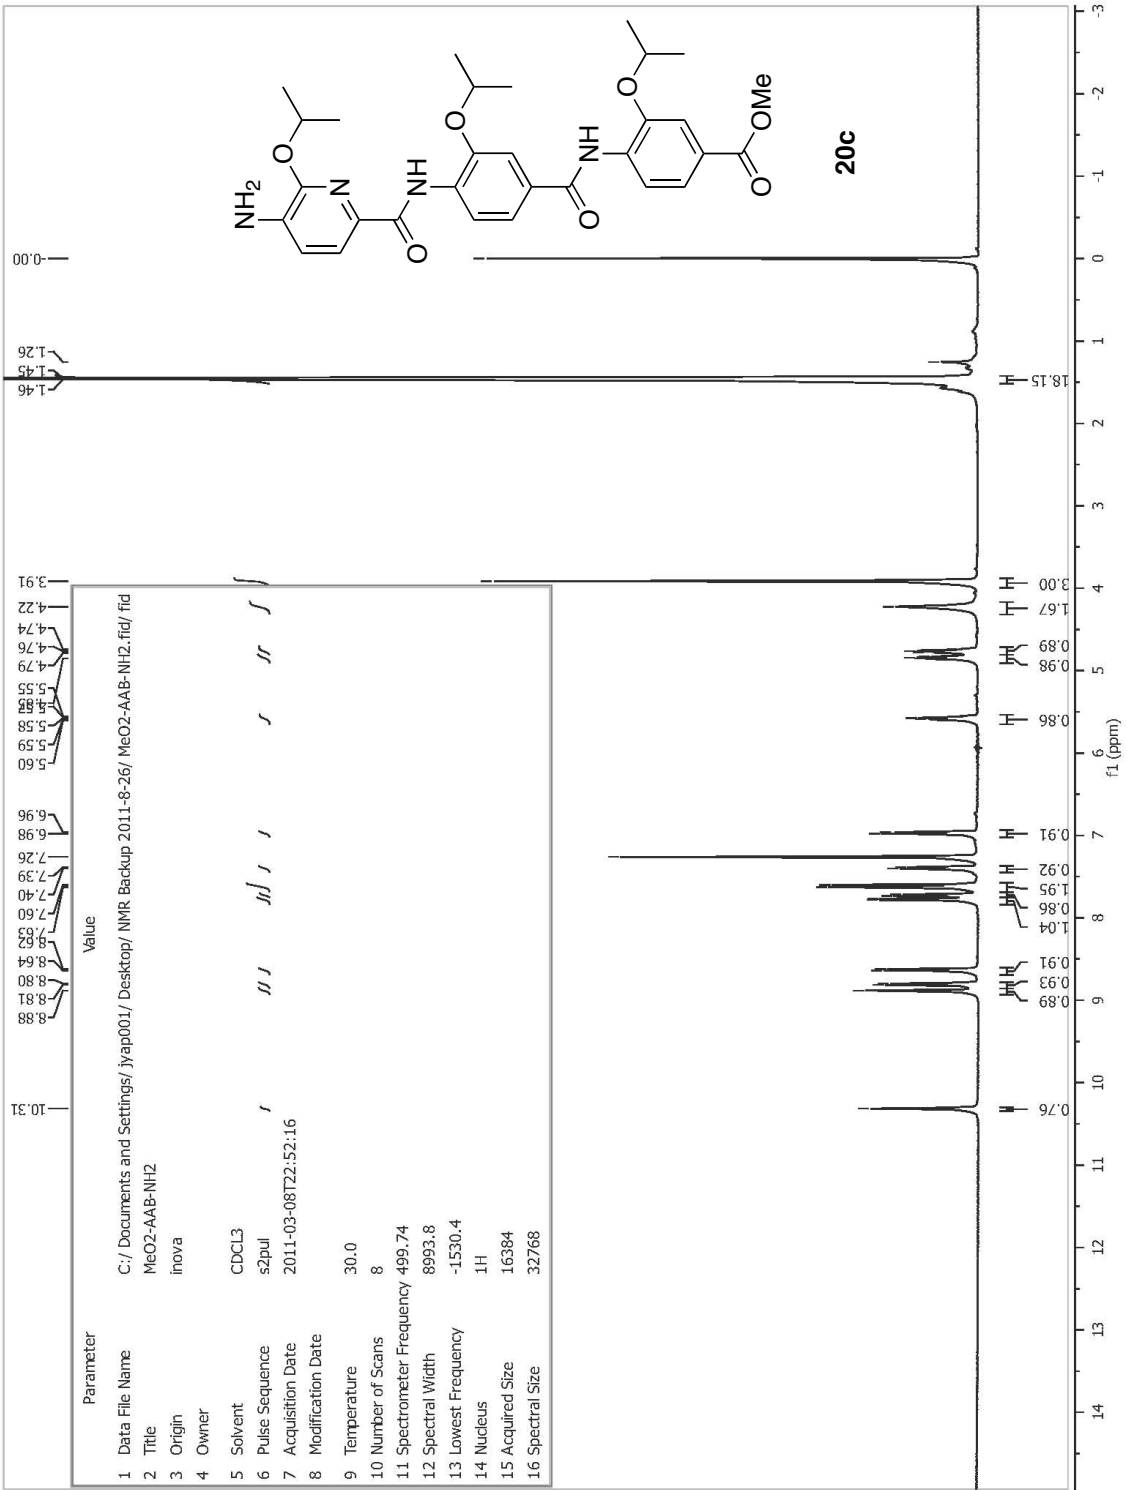



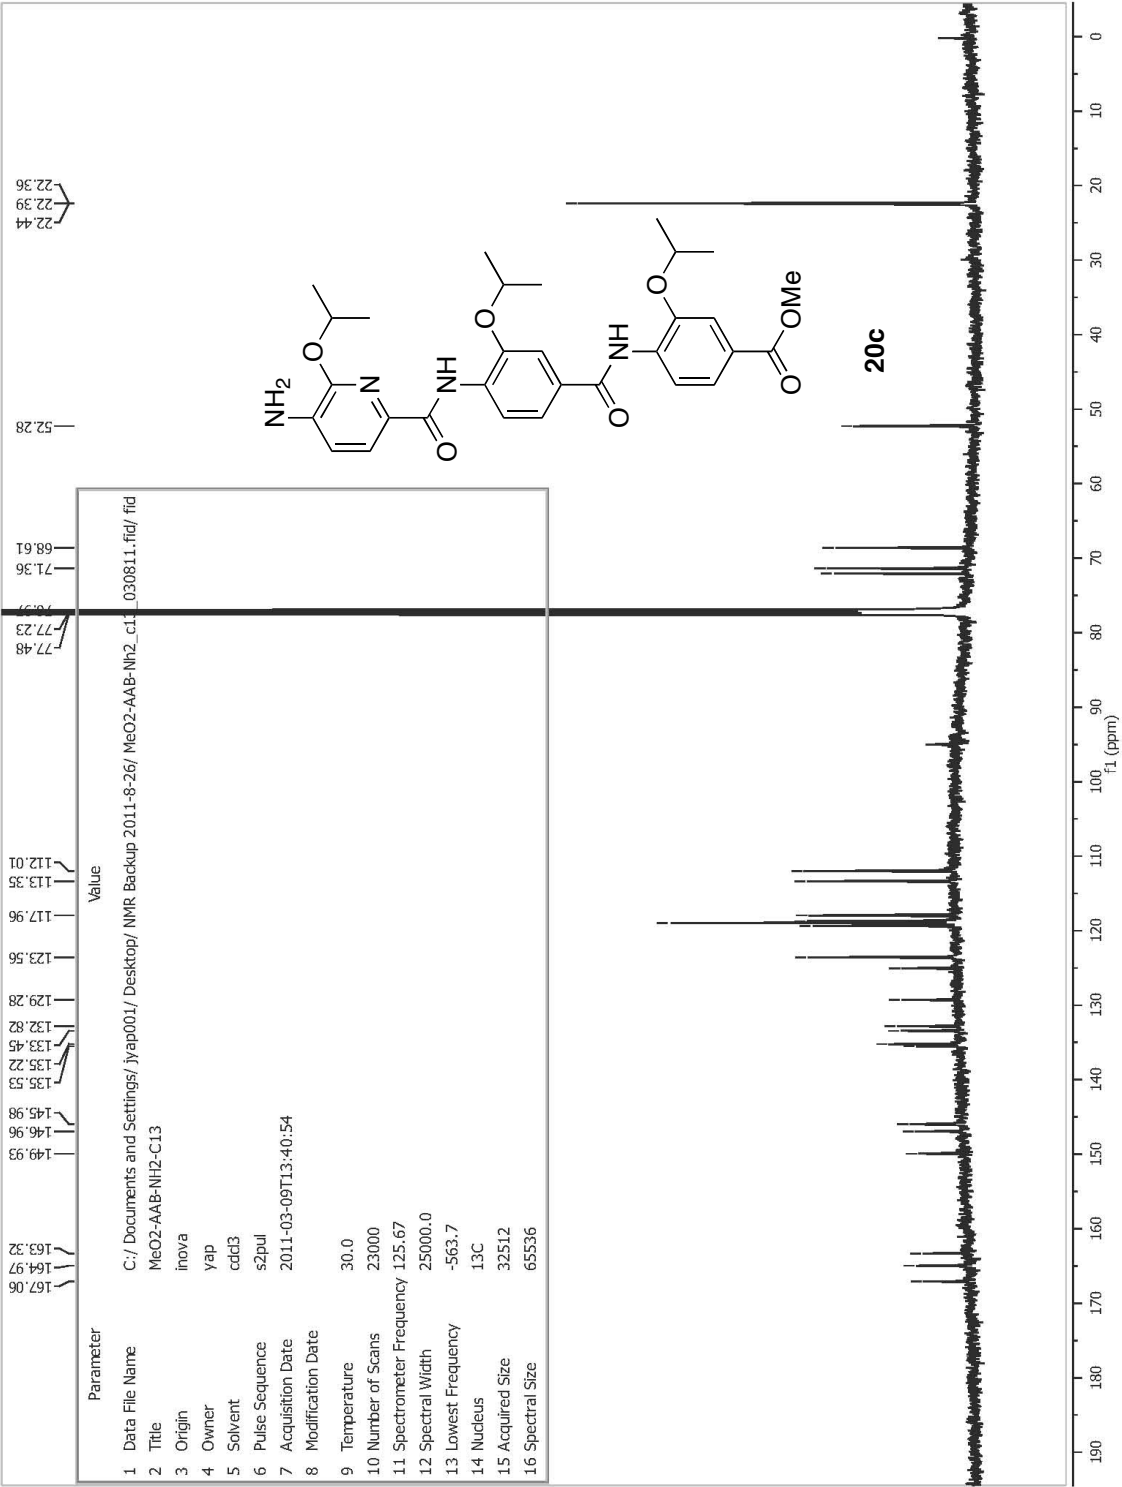

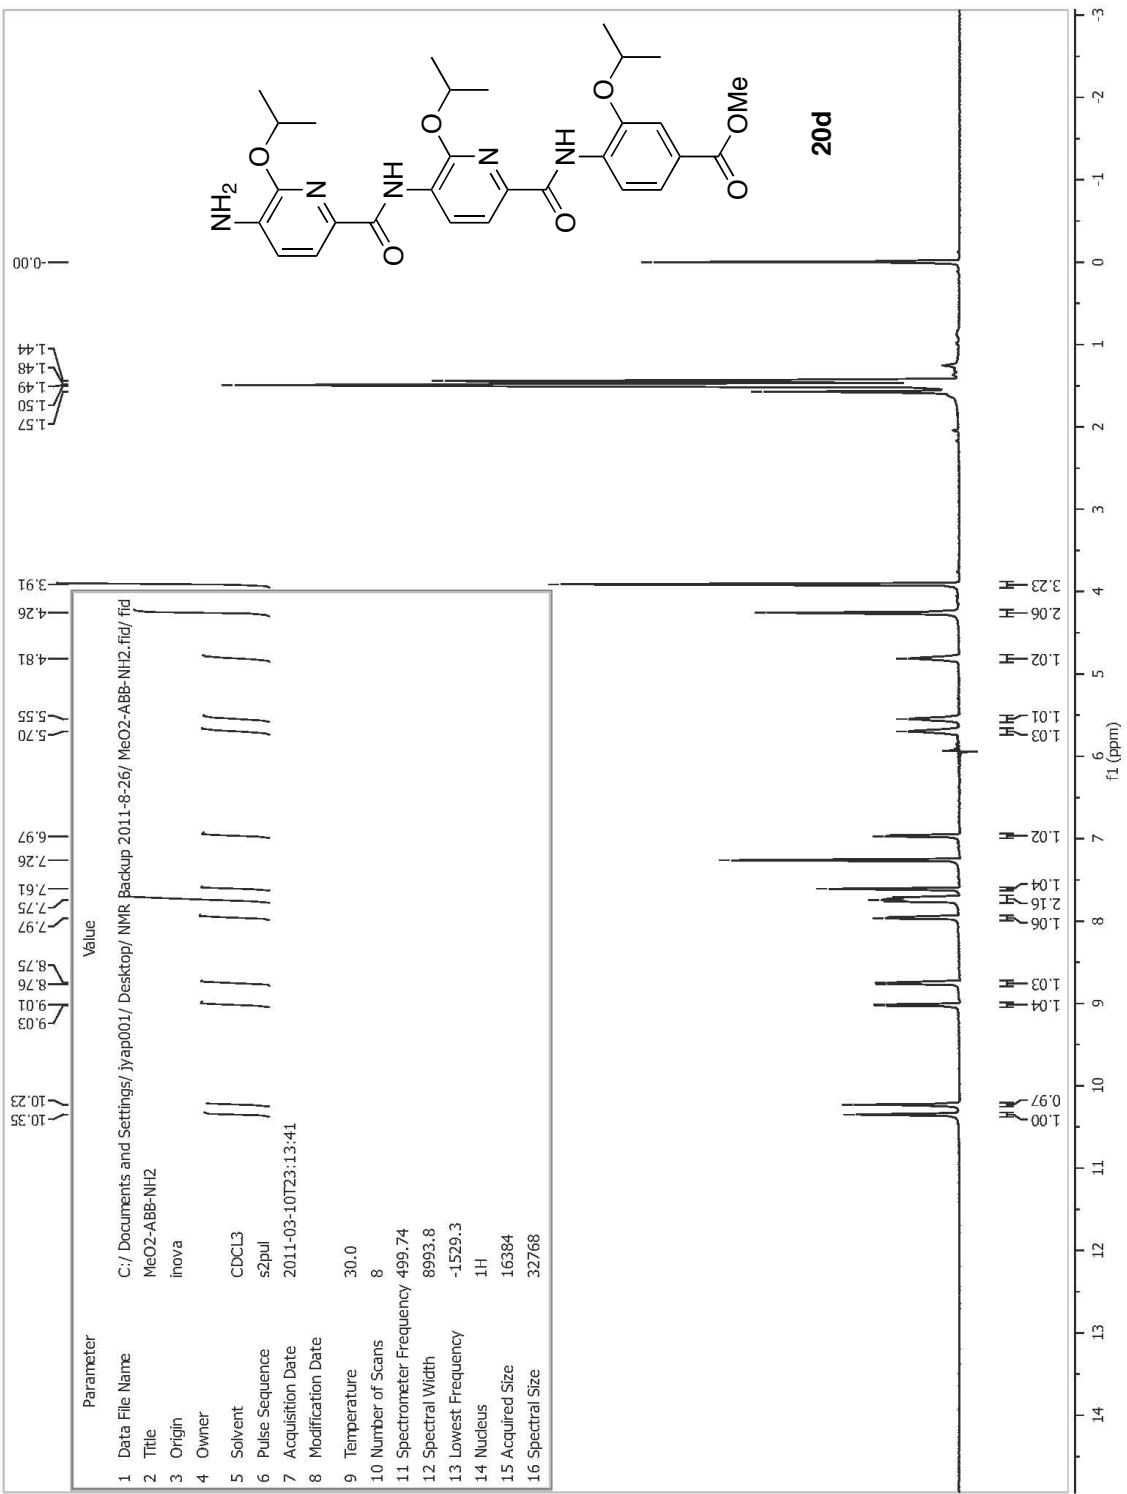

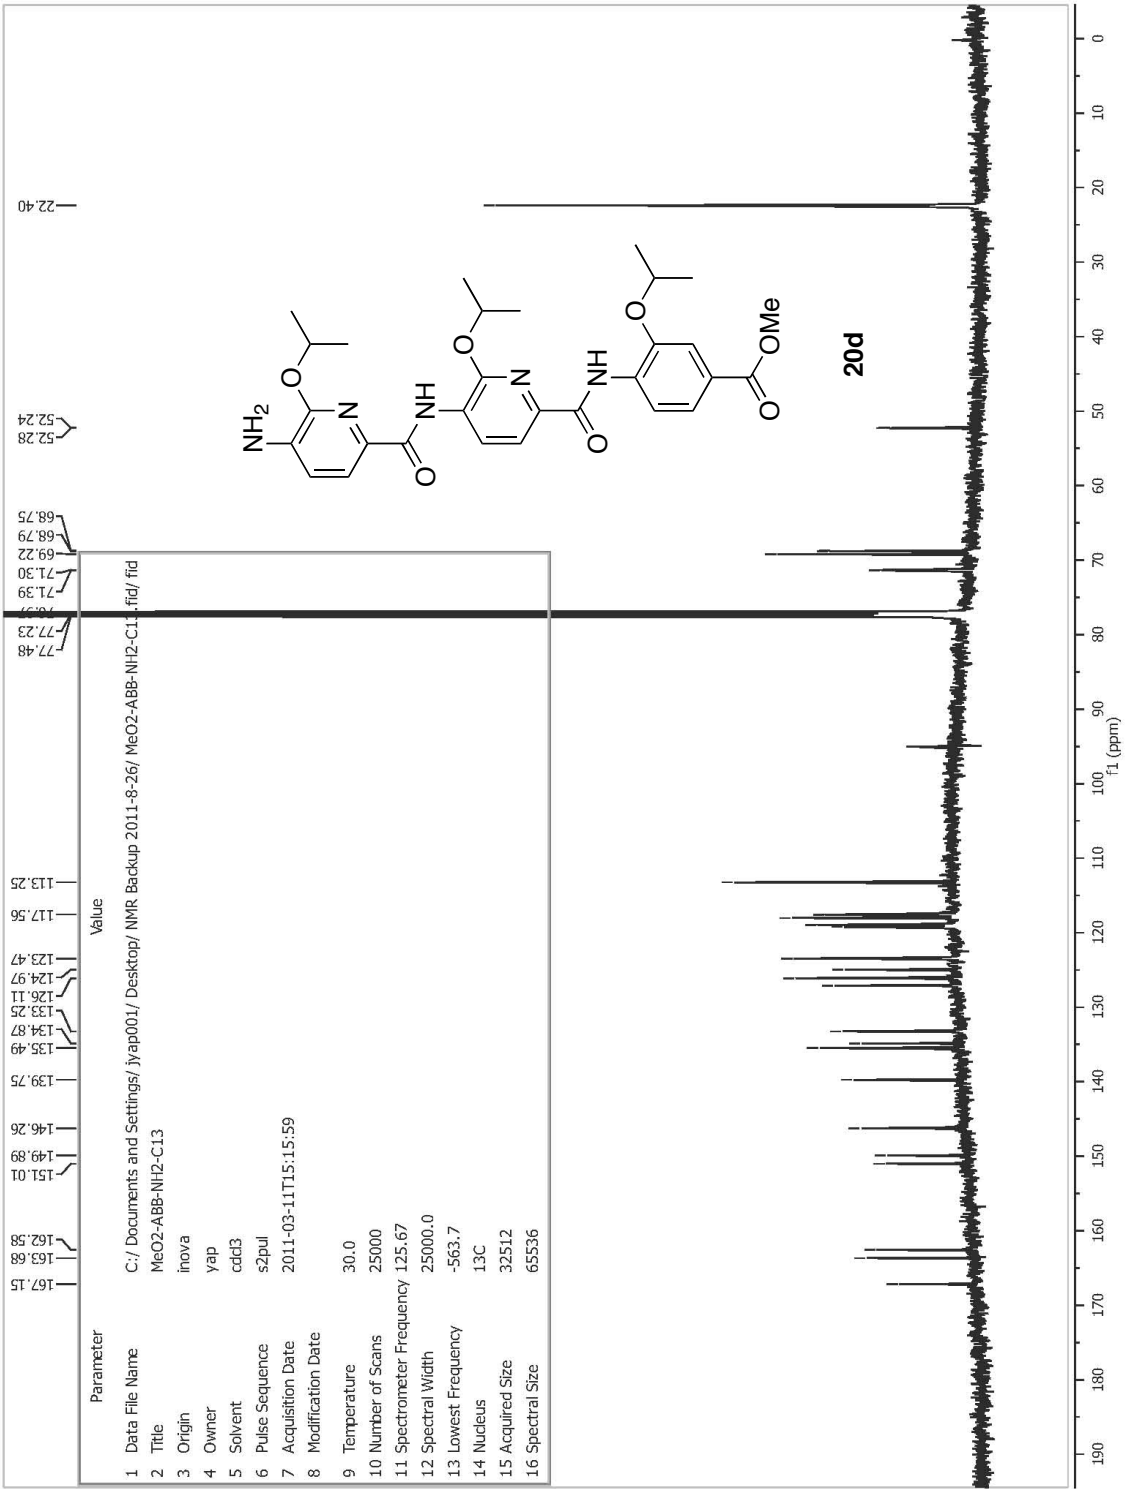

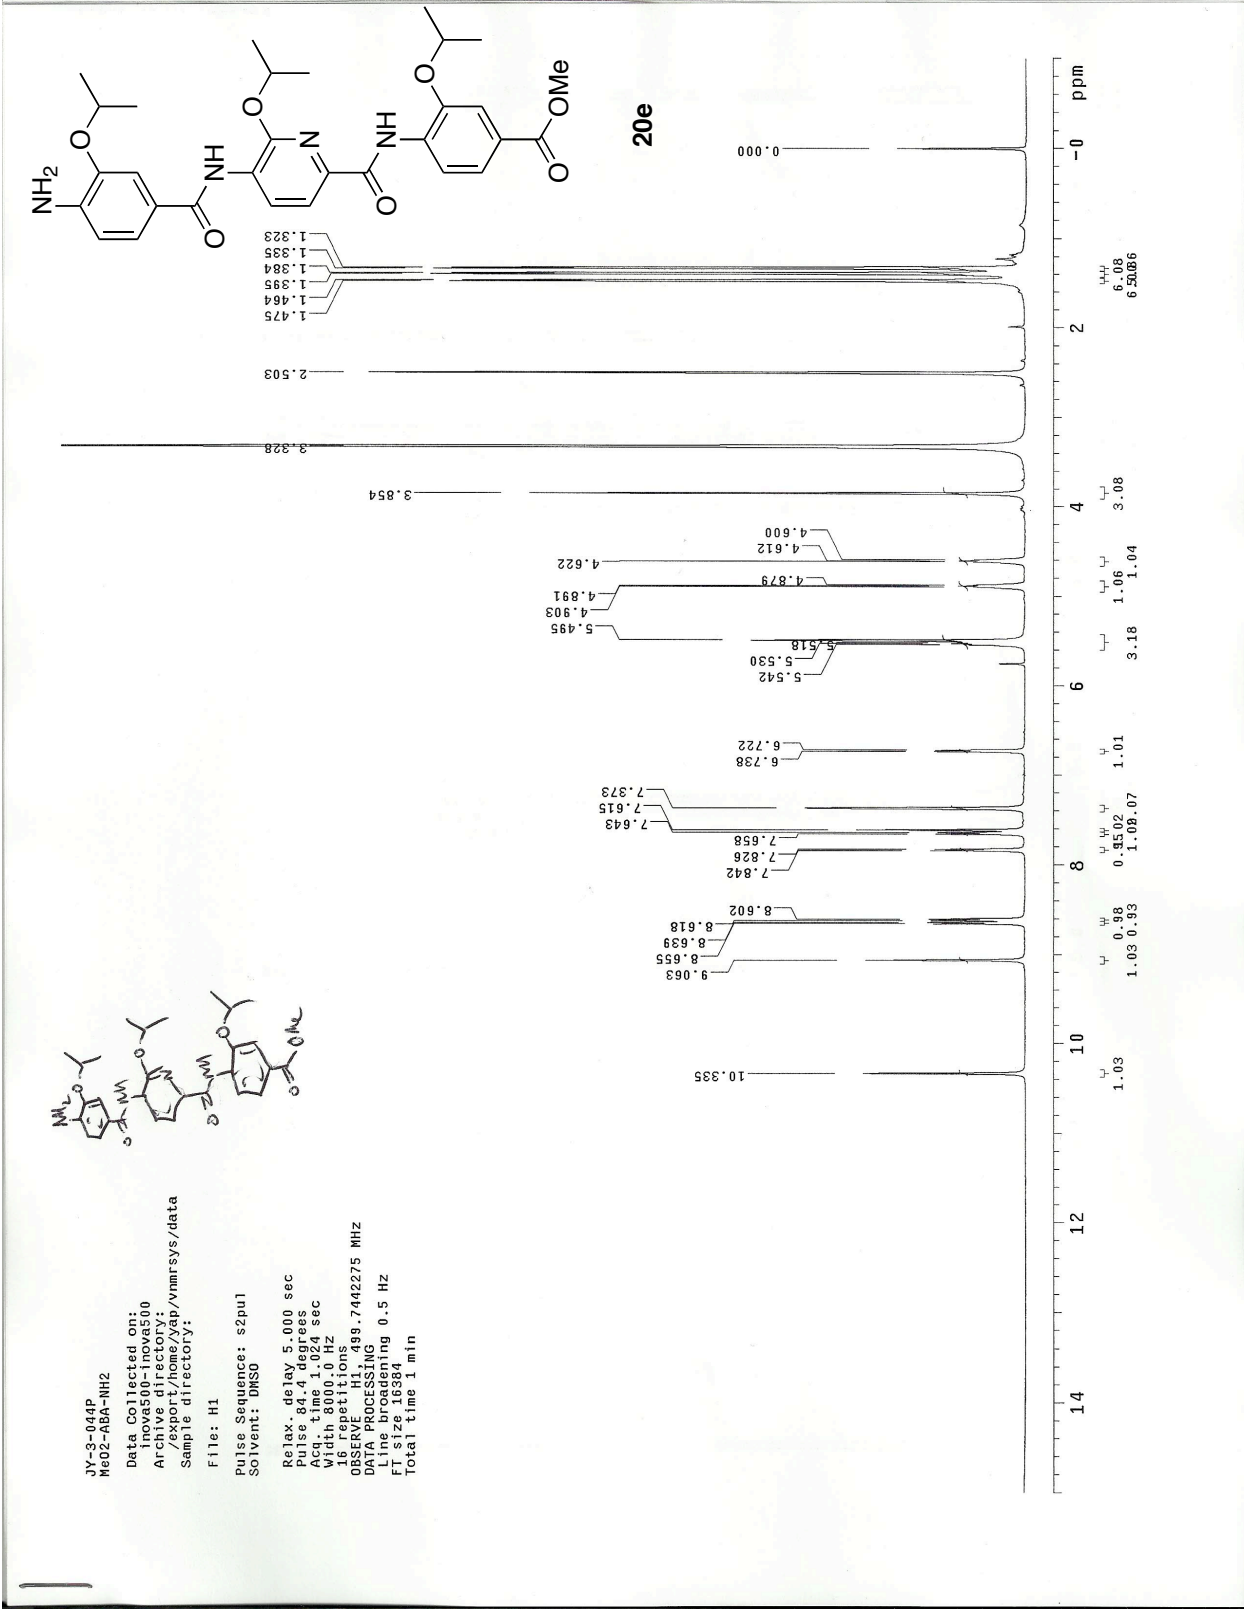

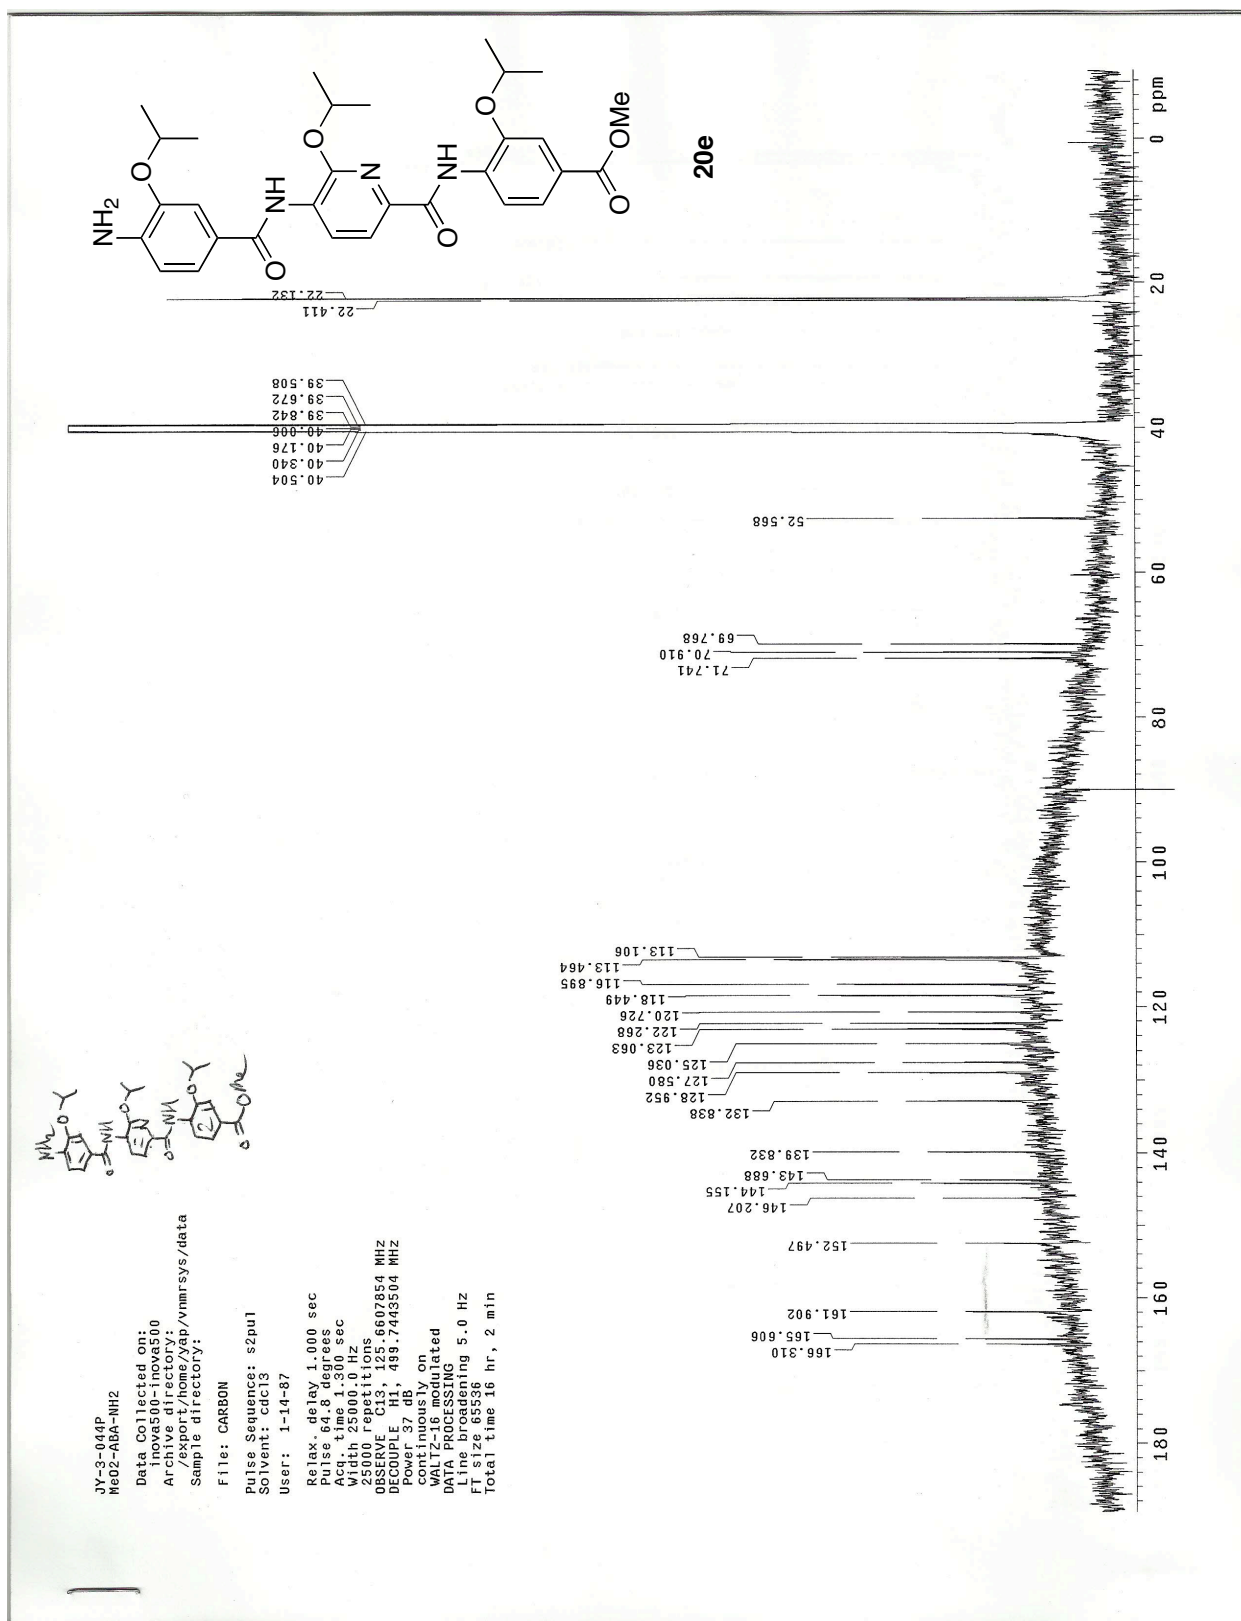

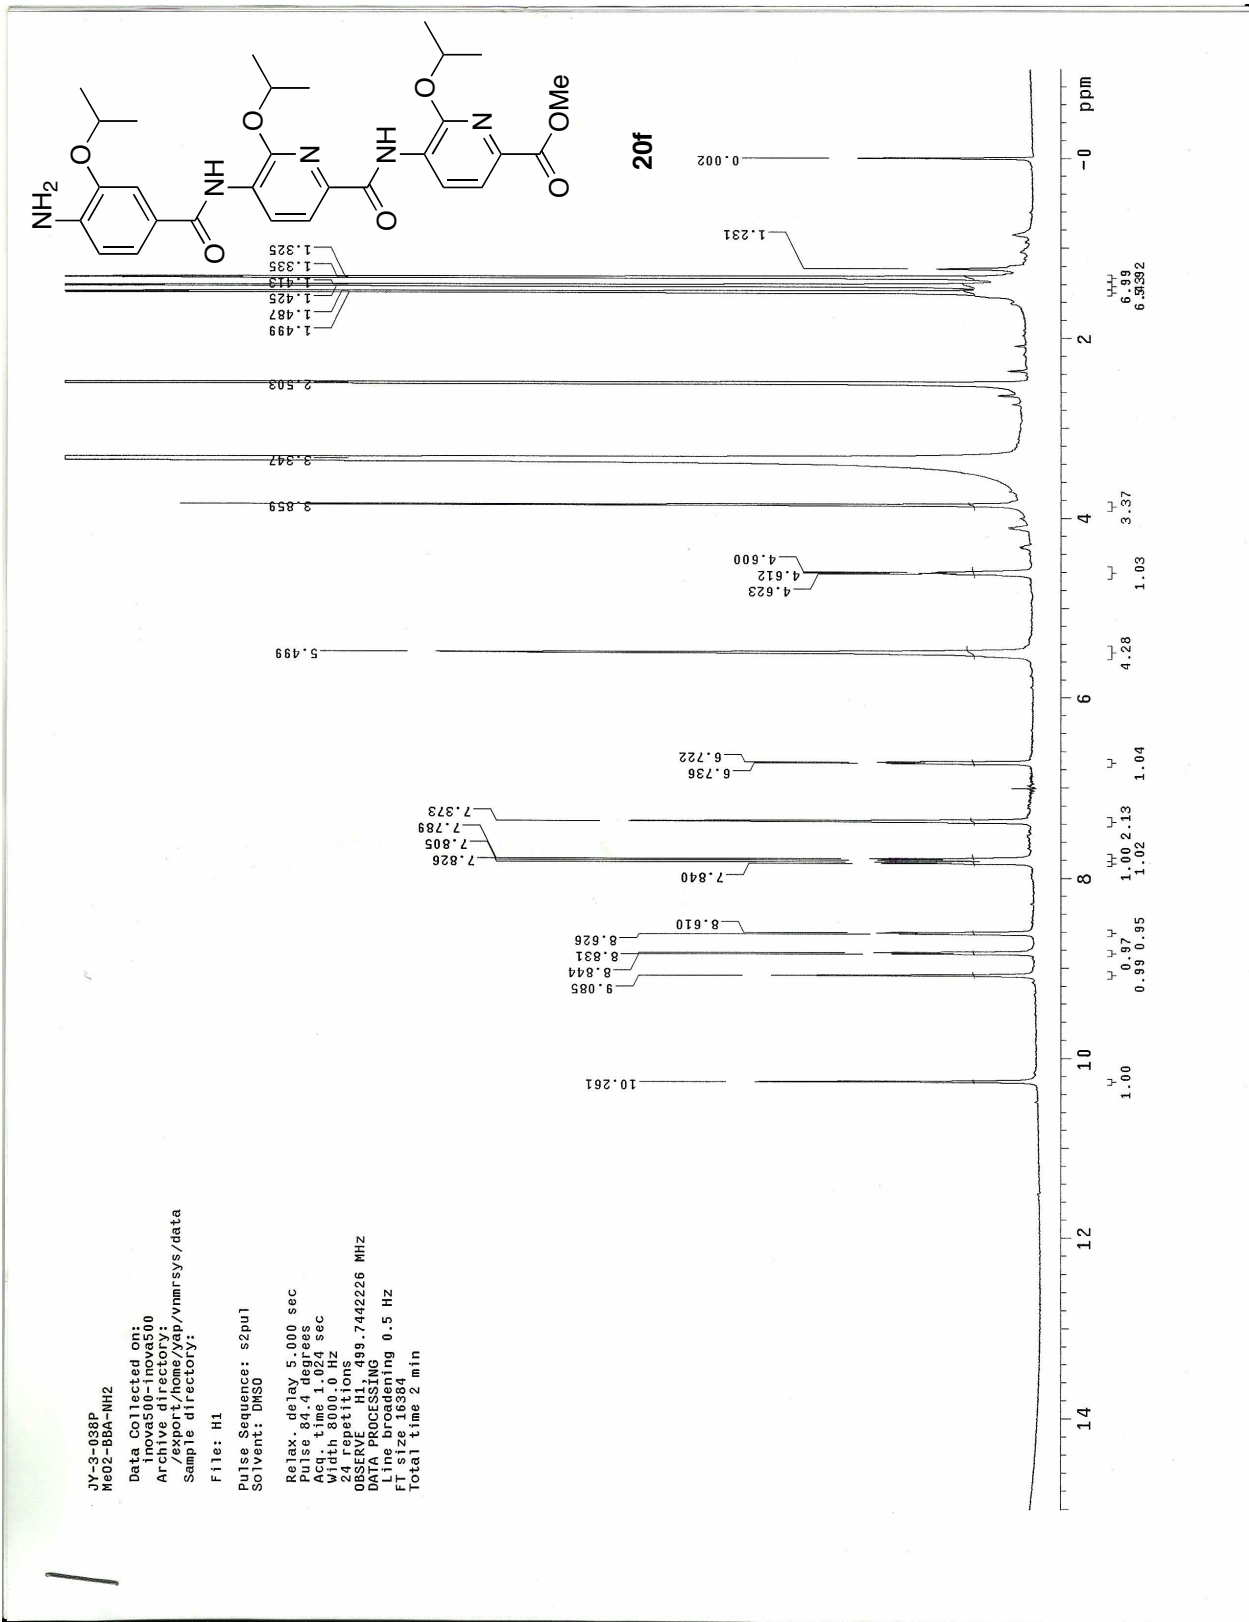

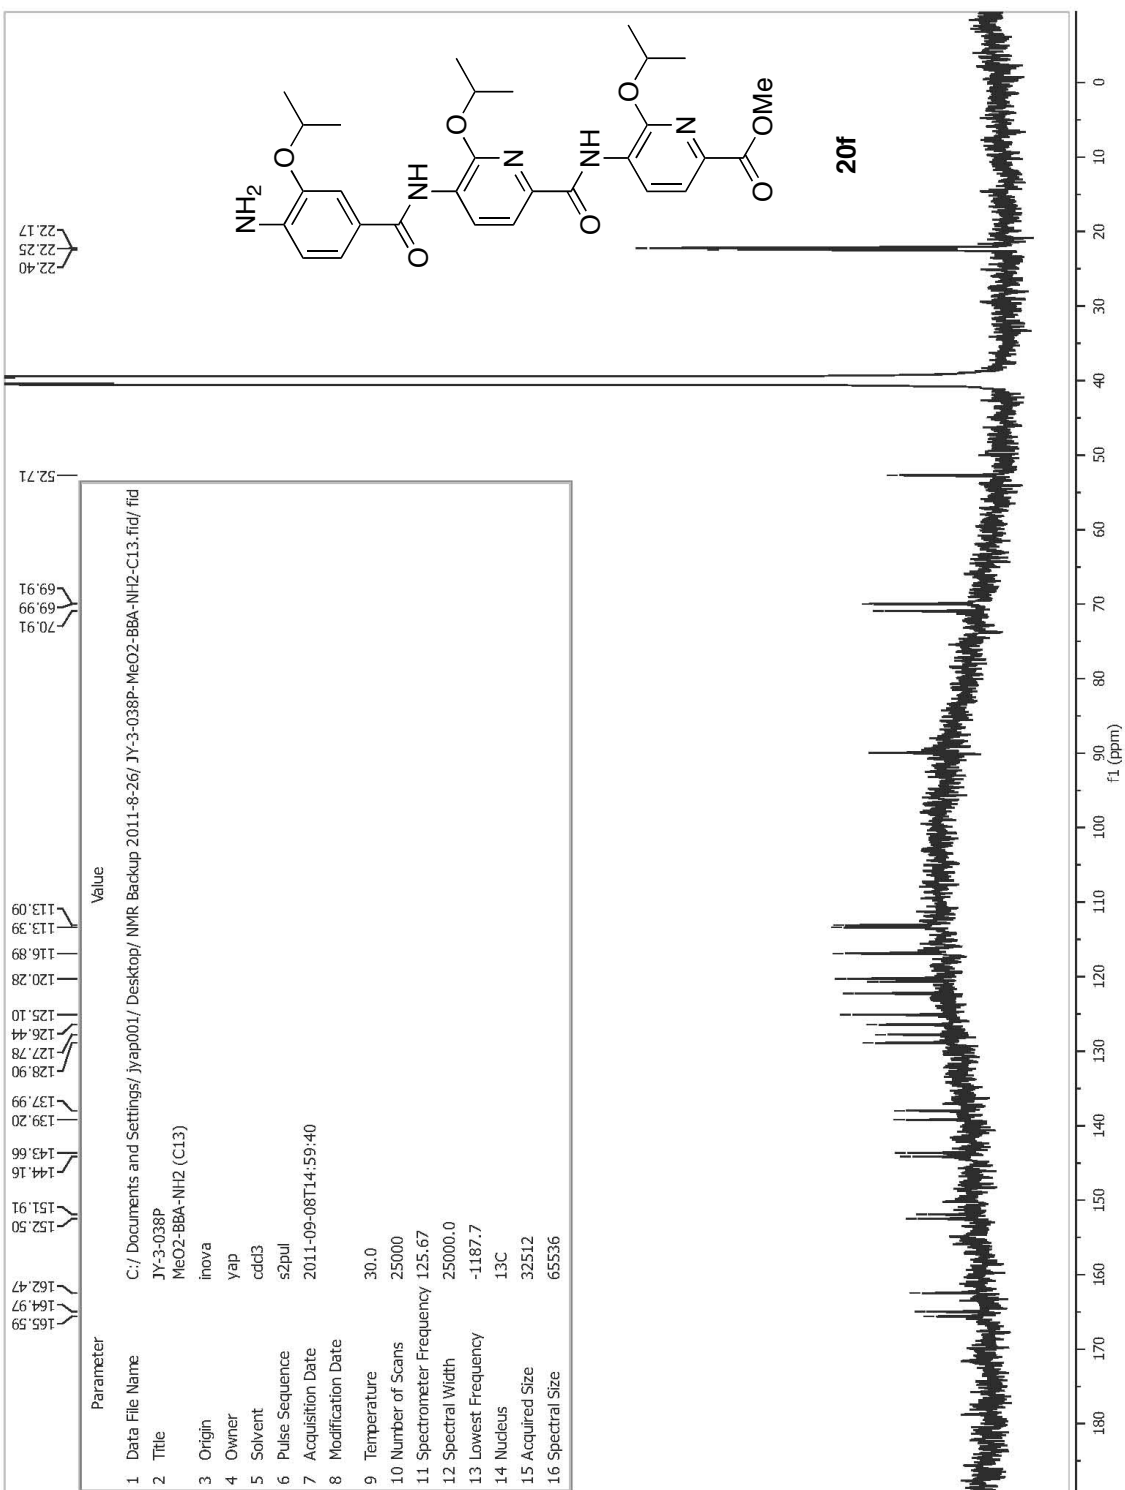

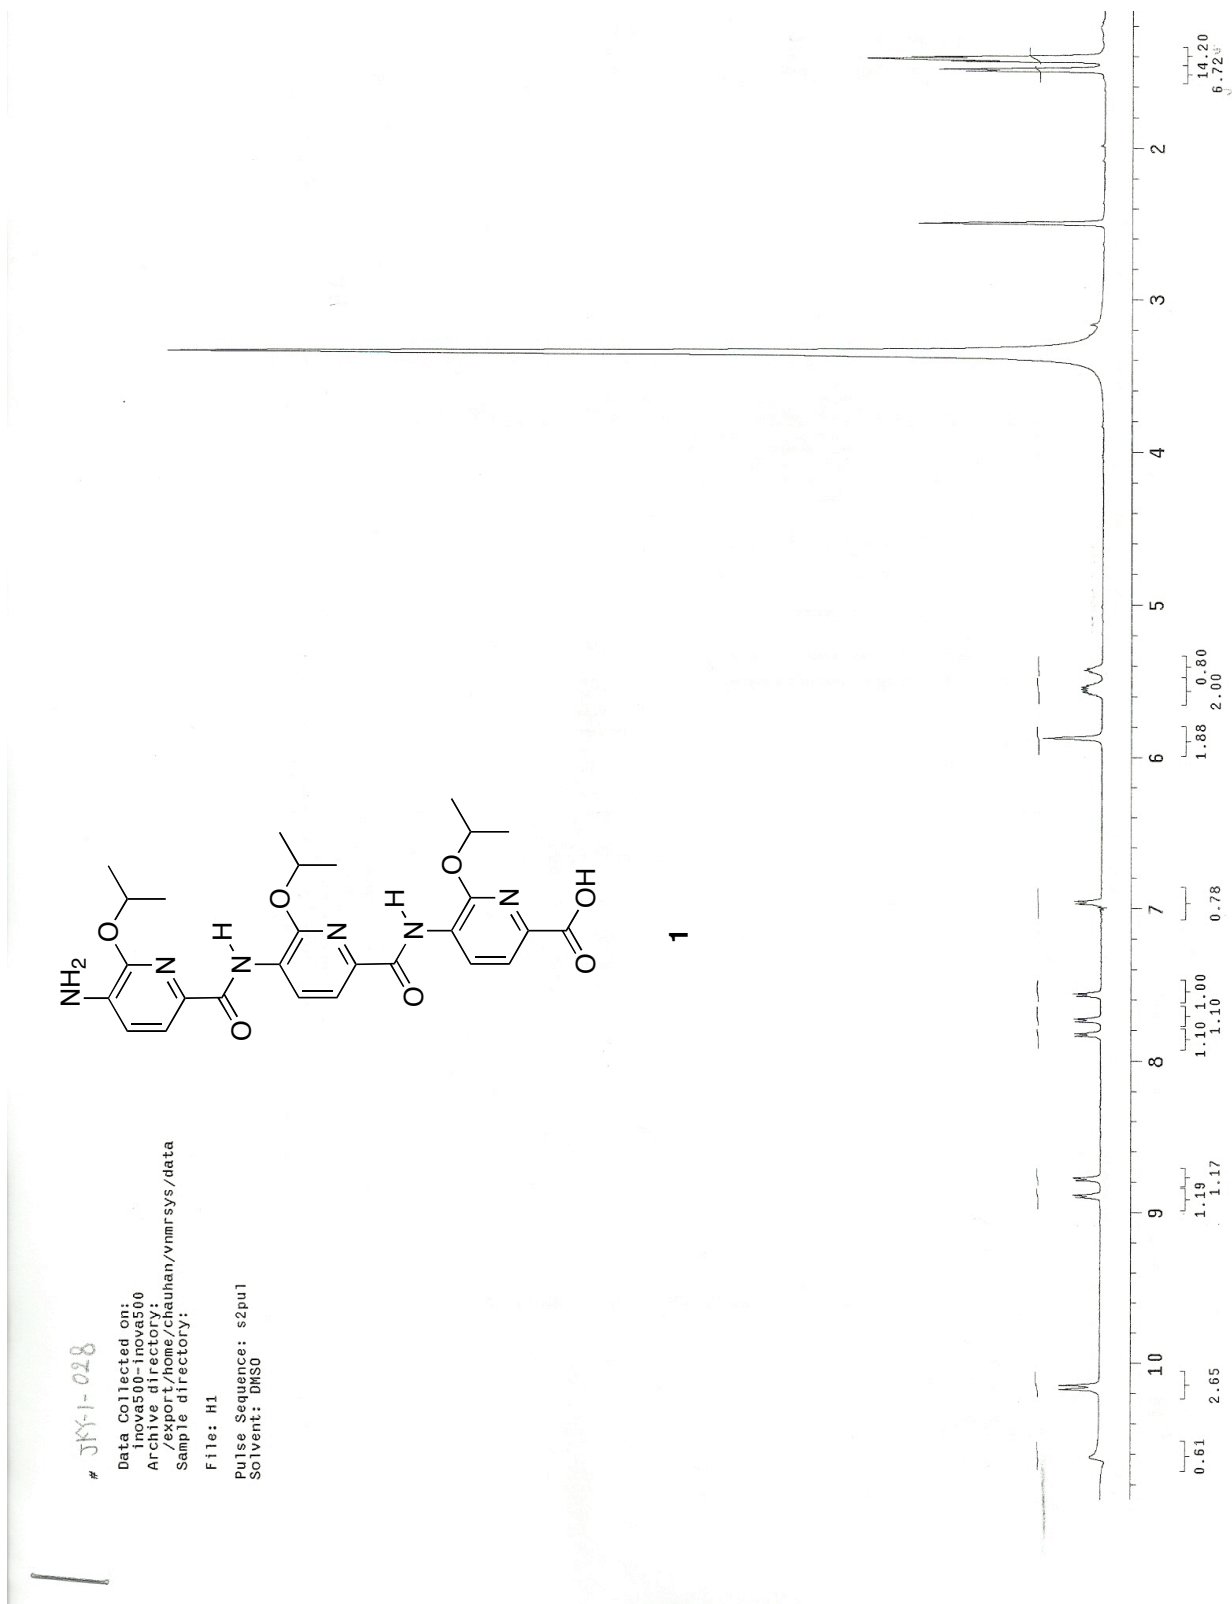



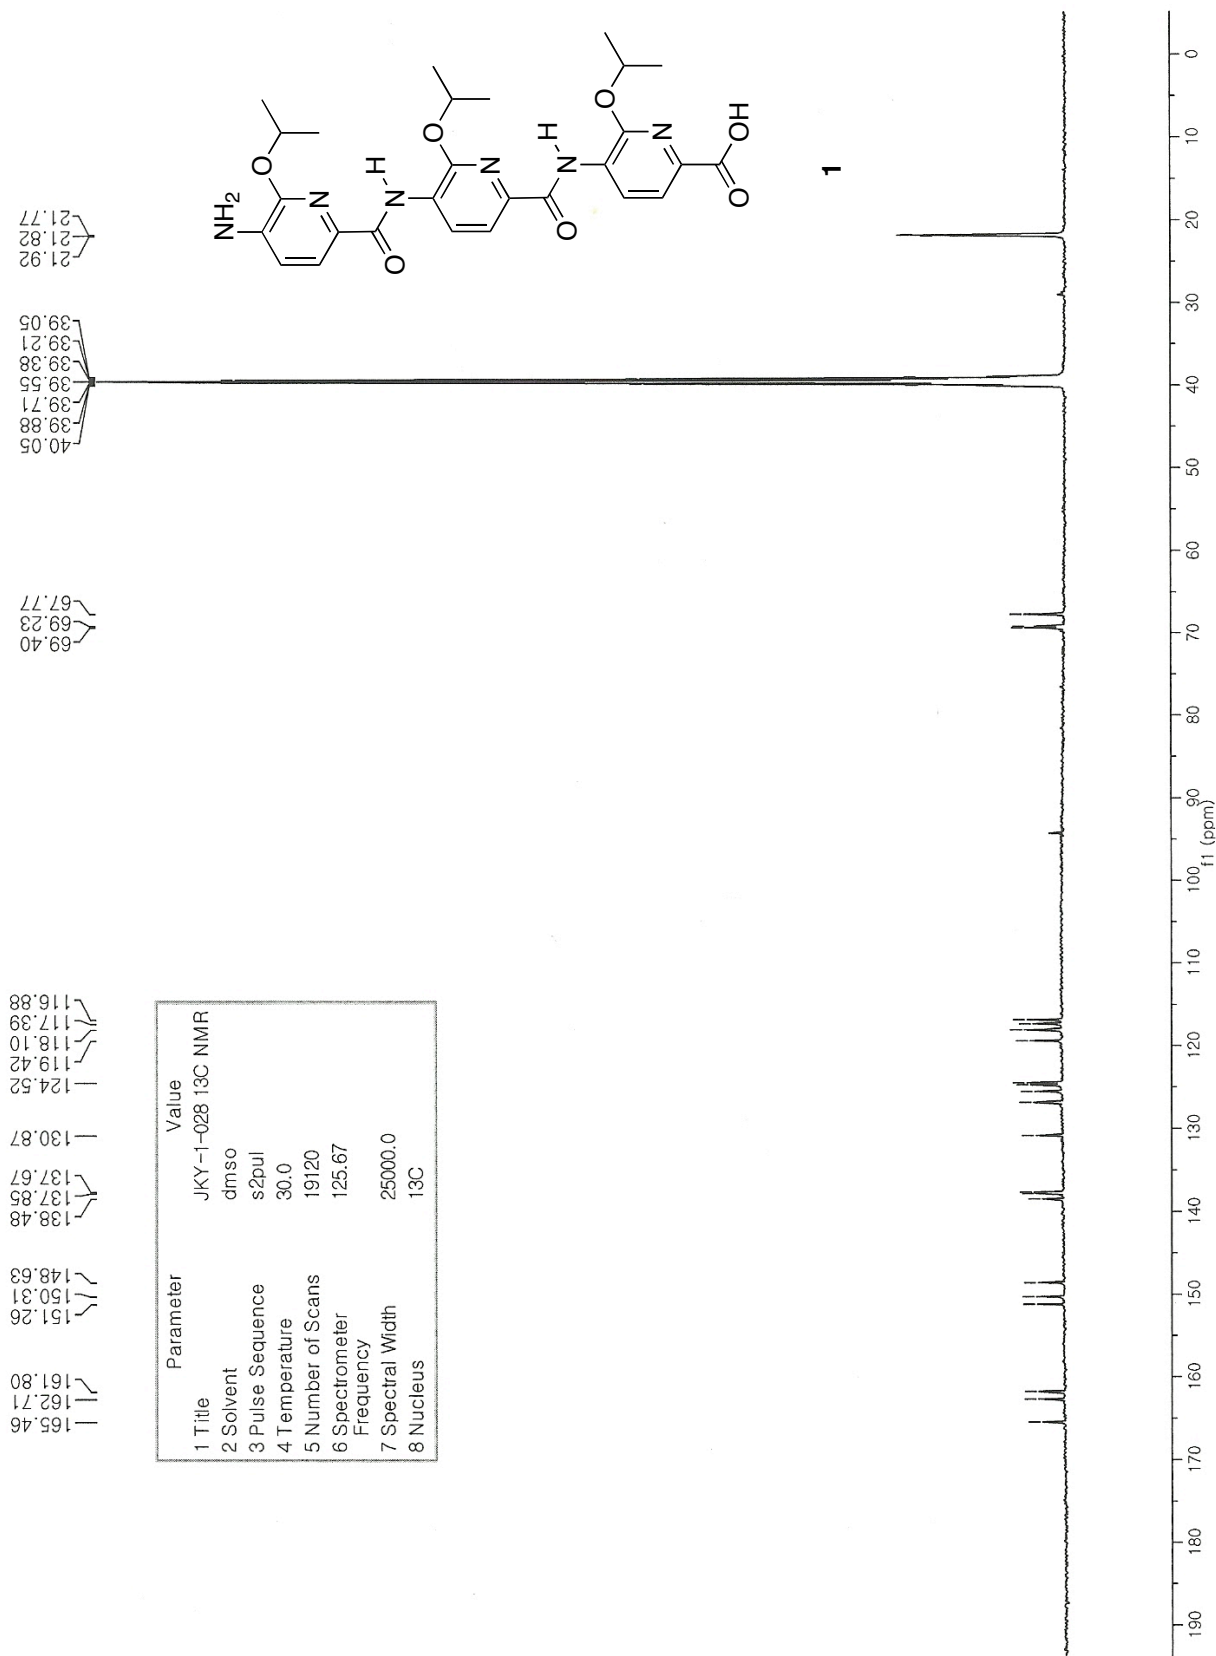

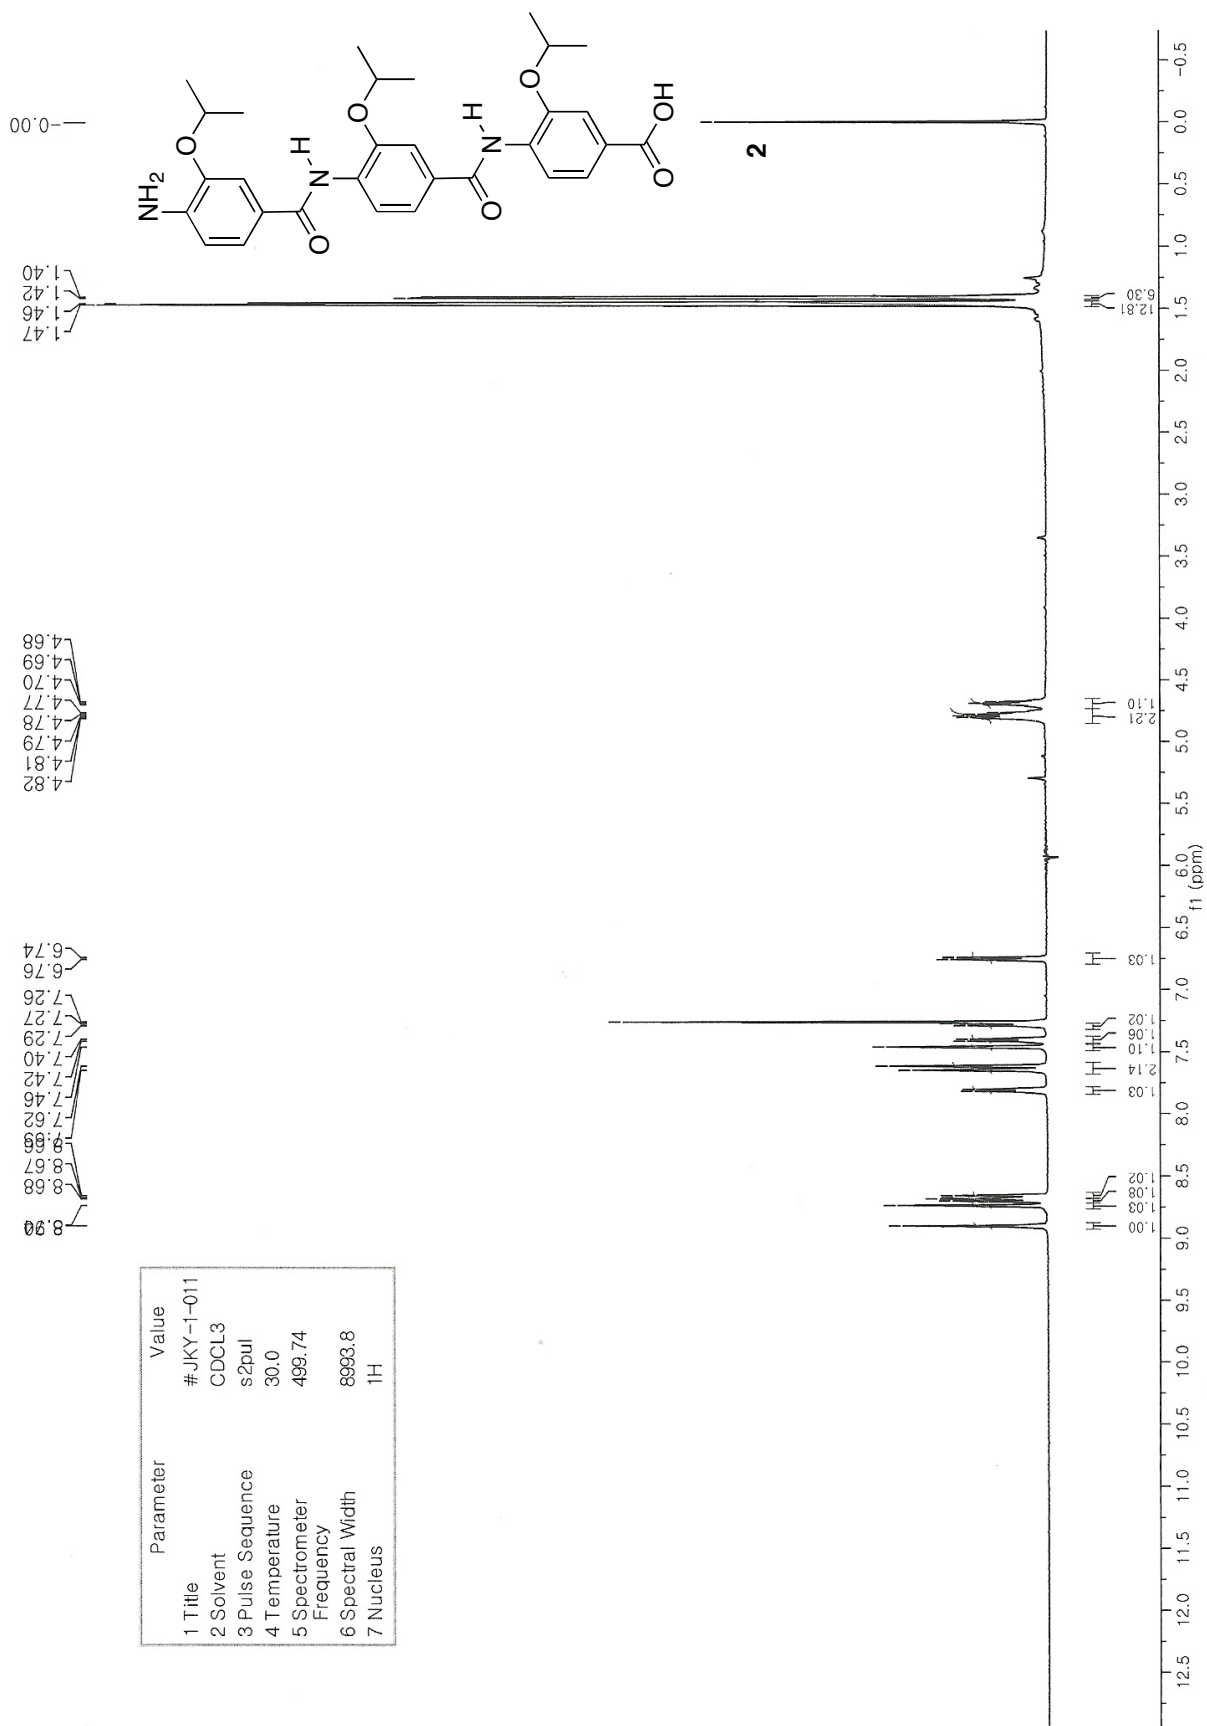

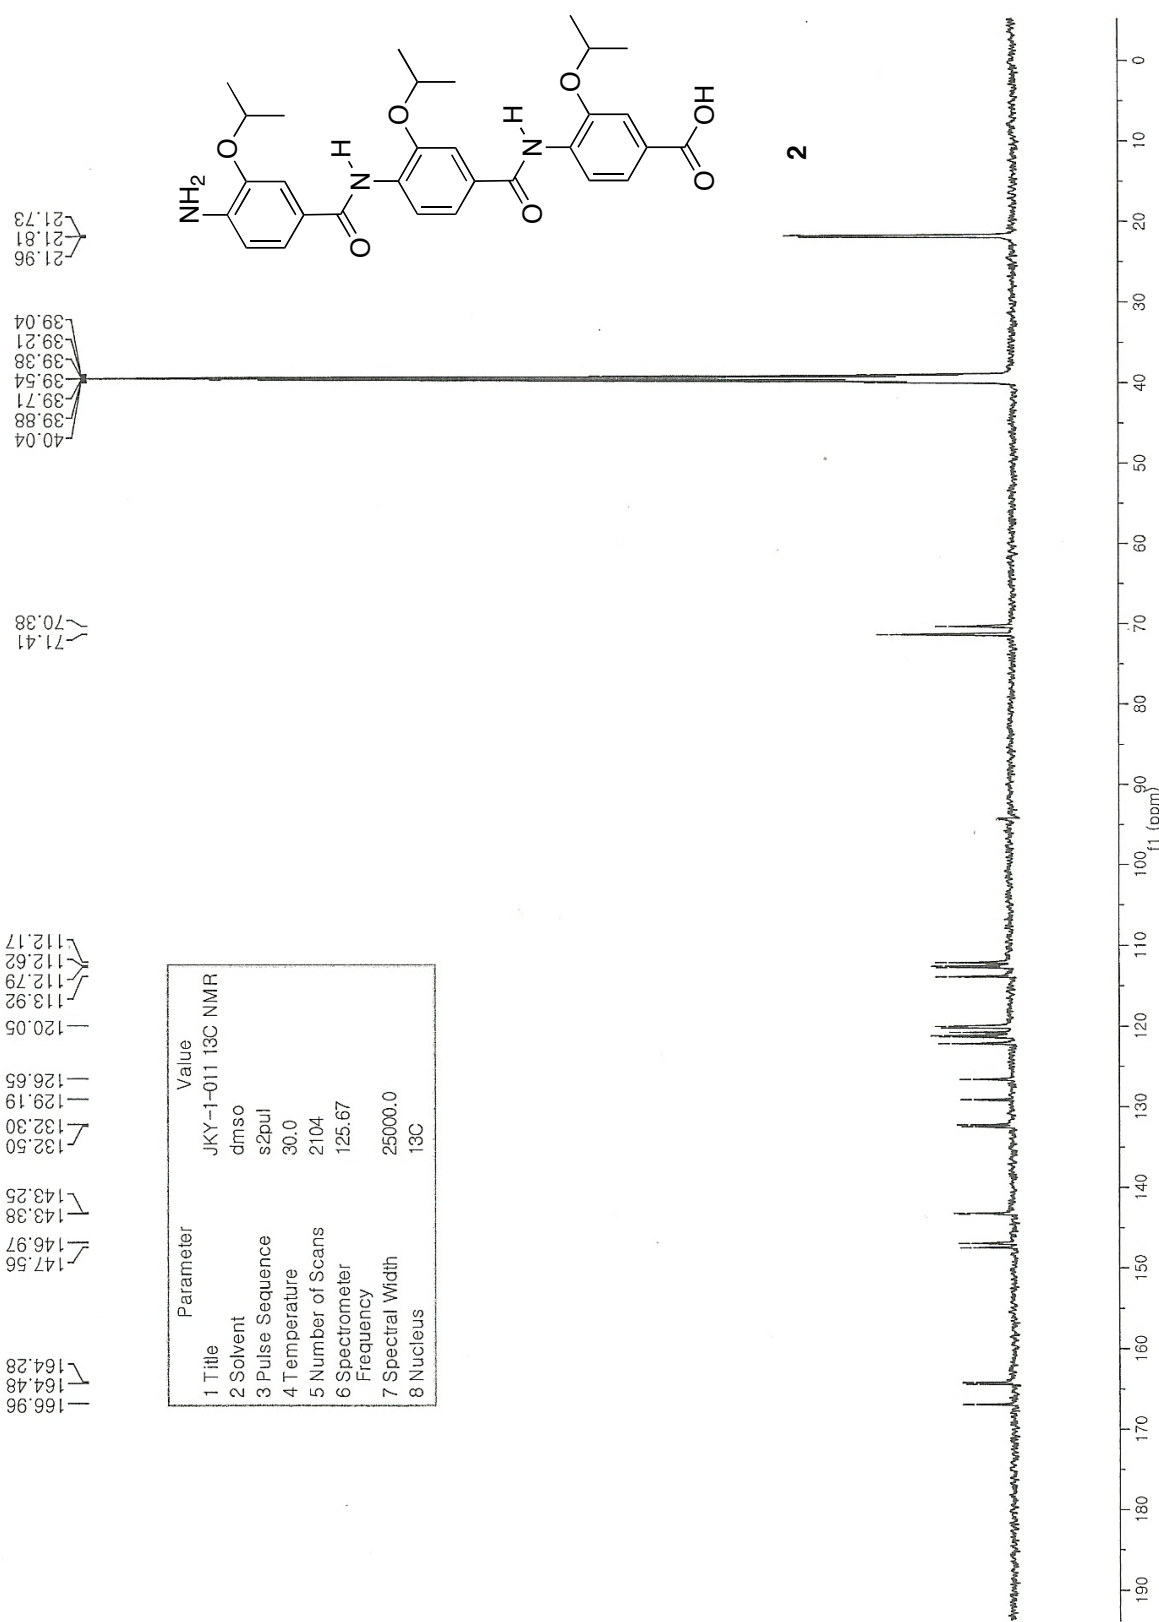



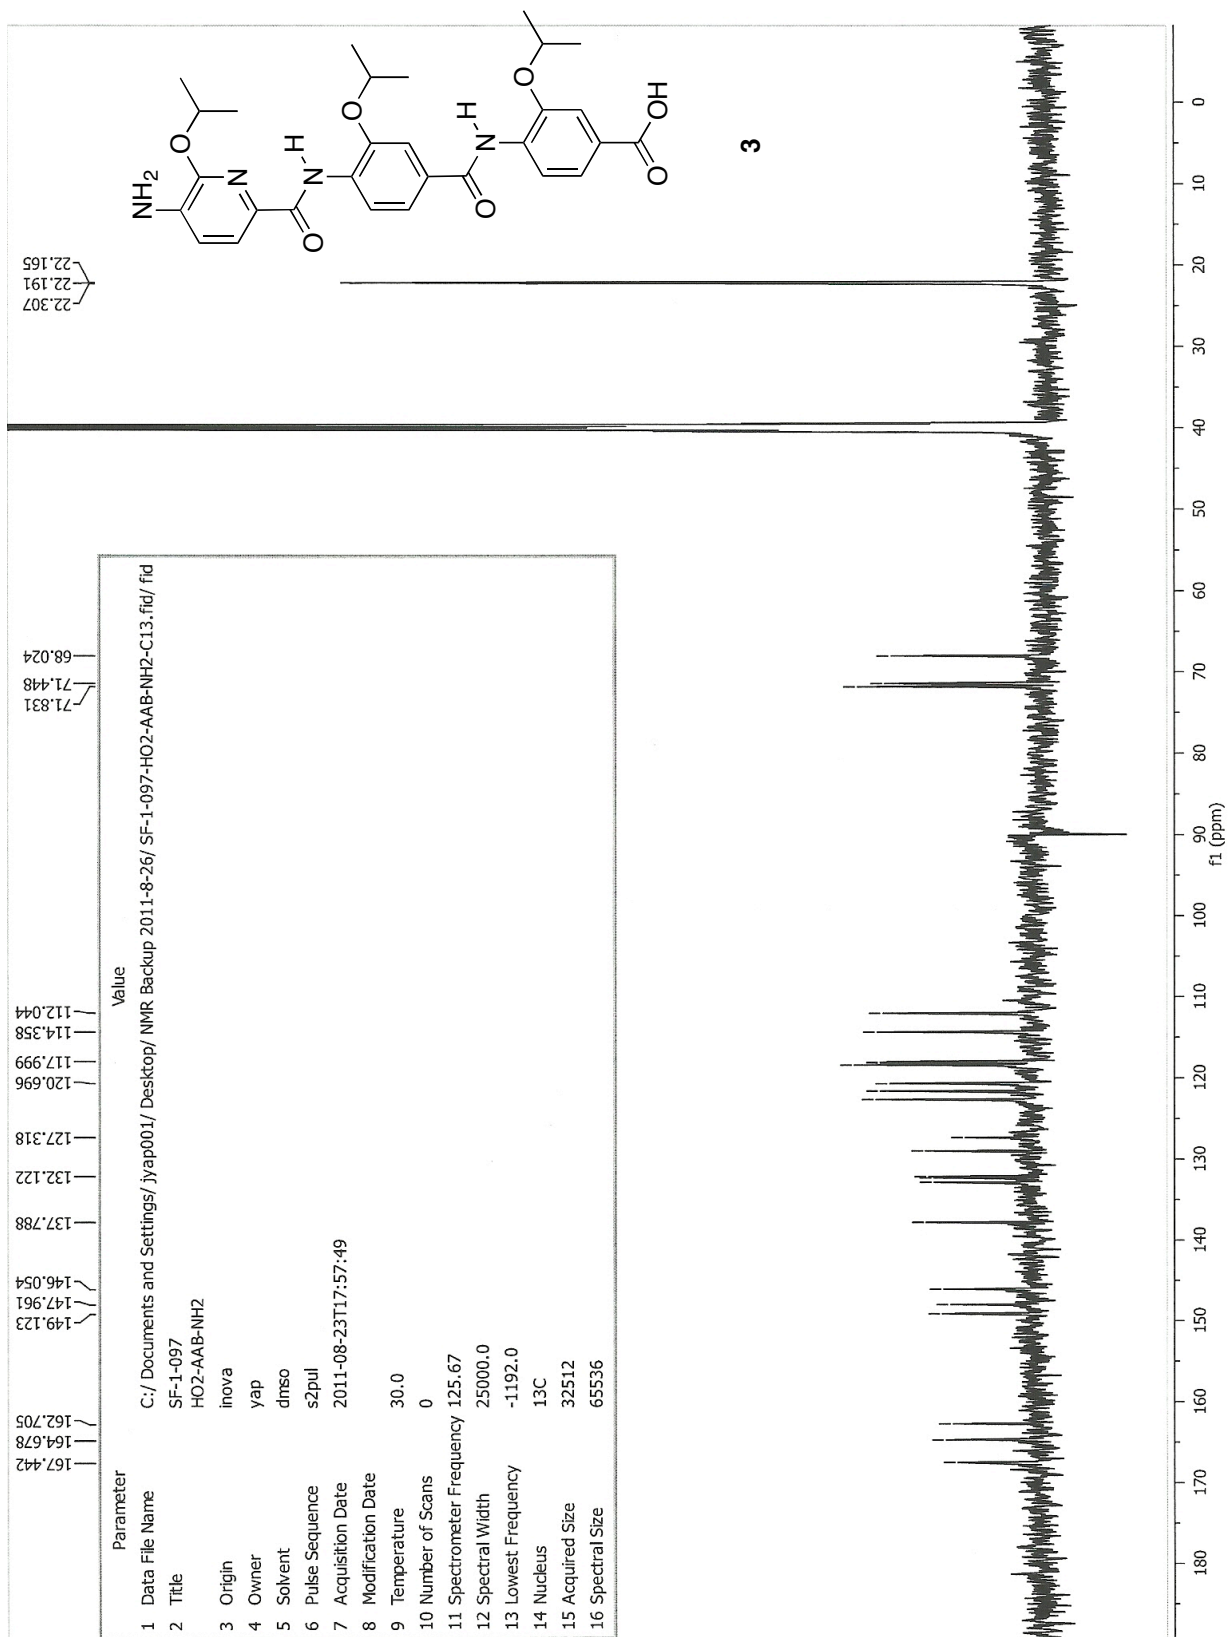

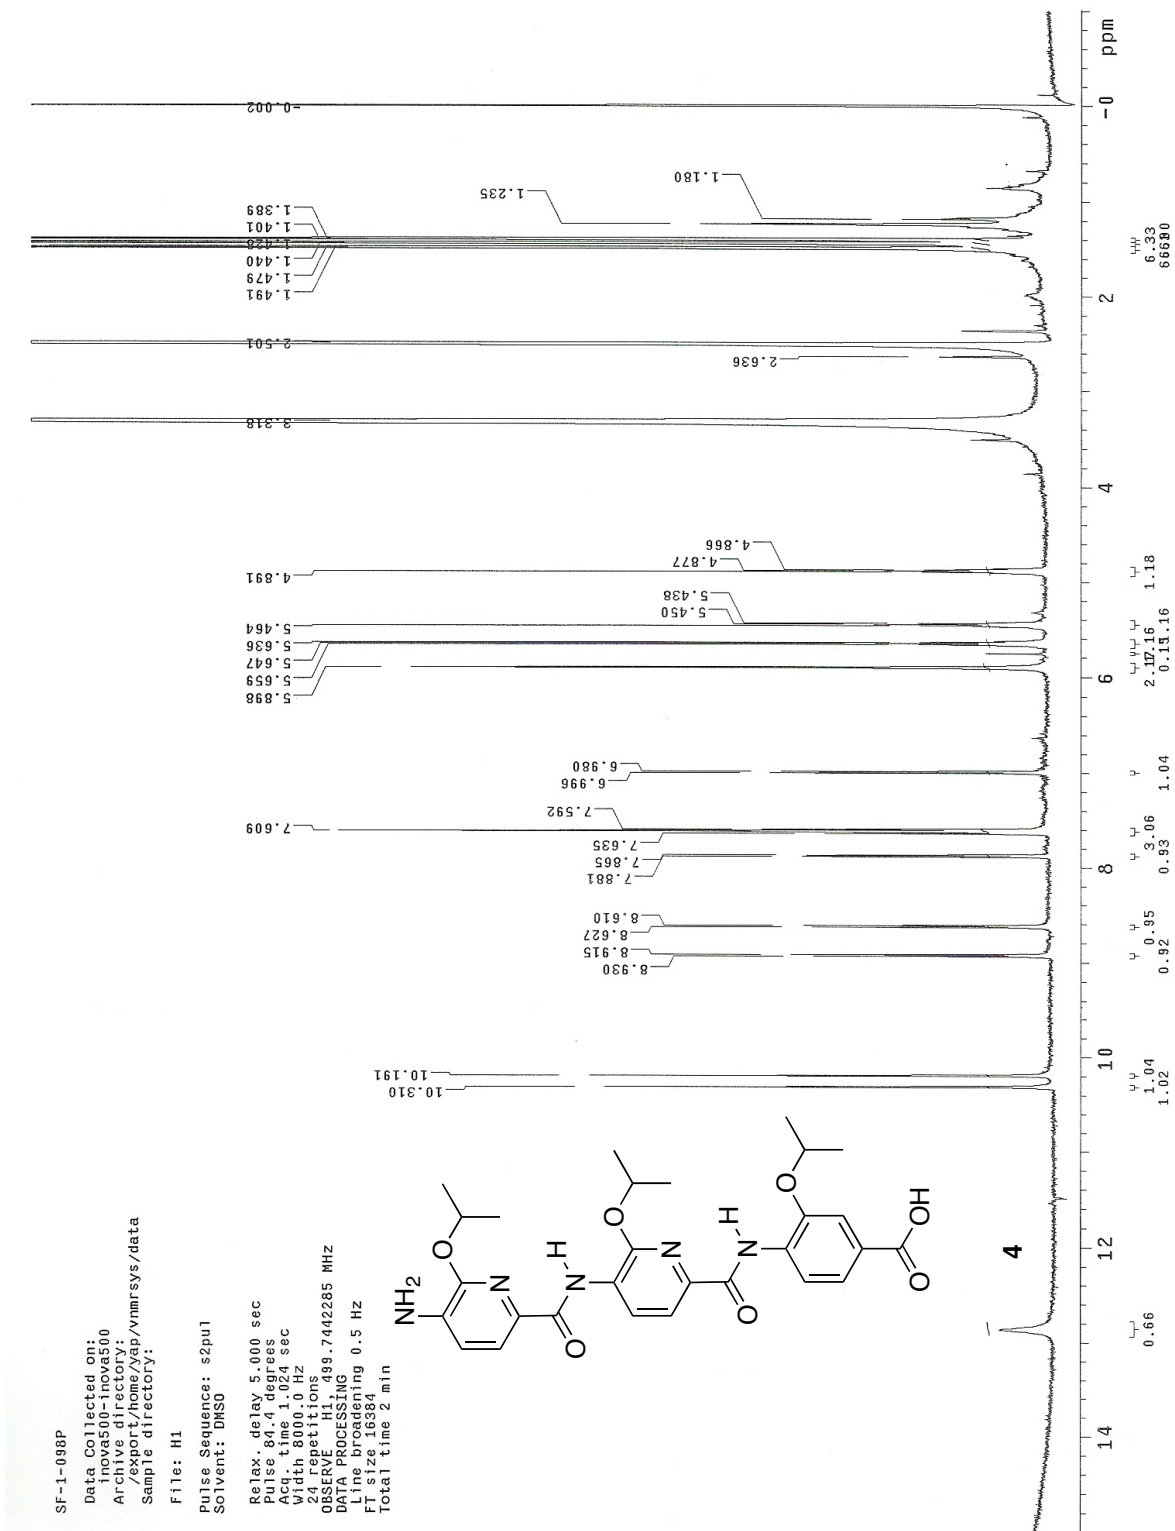

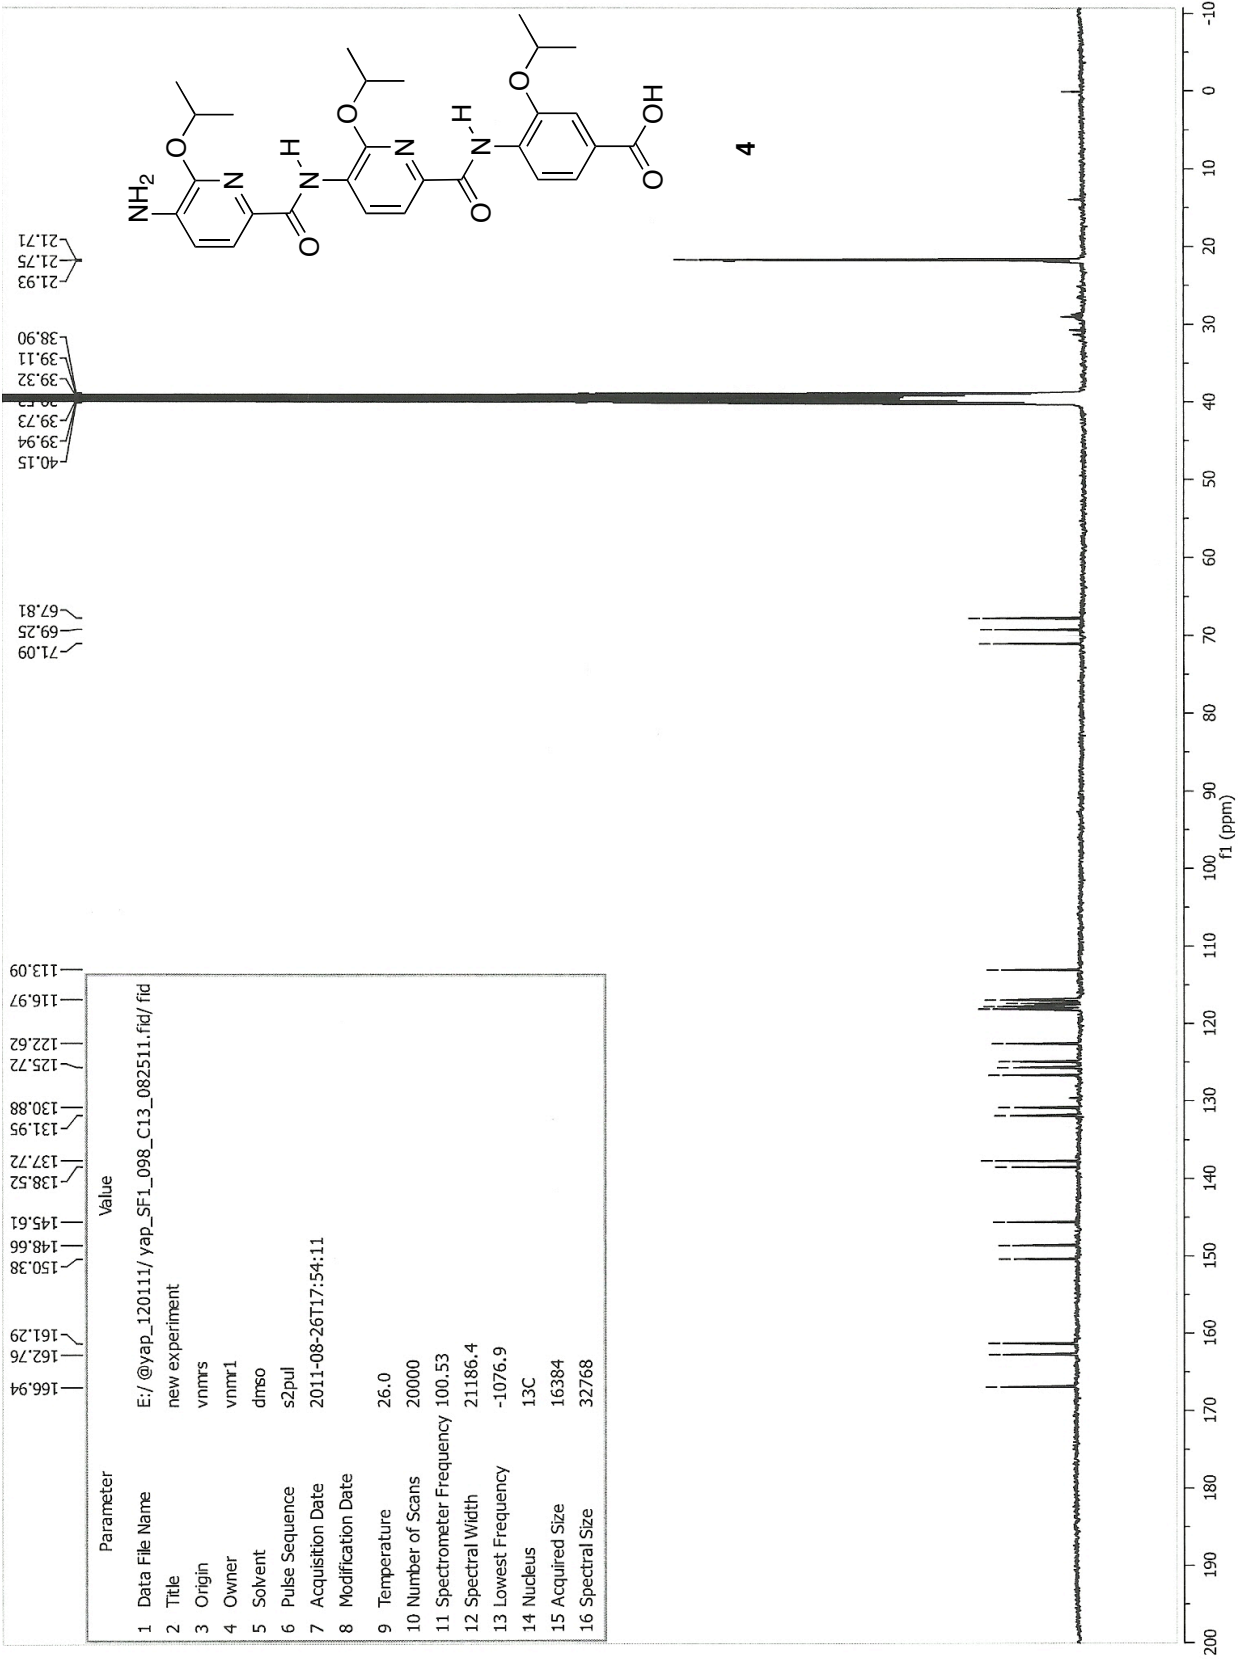

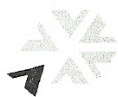

**VARIAN**

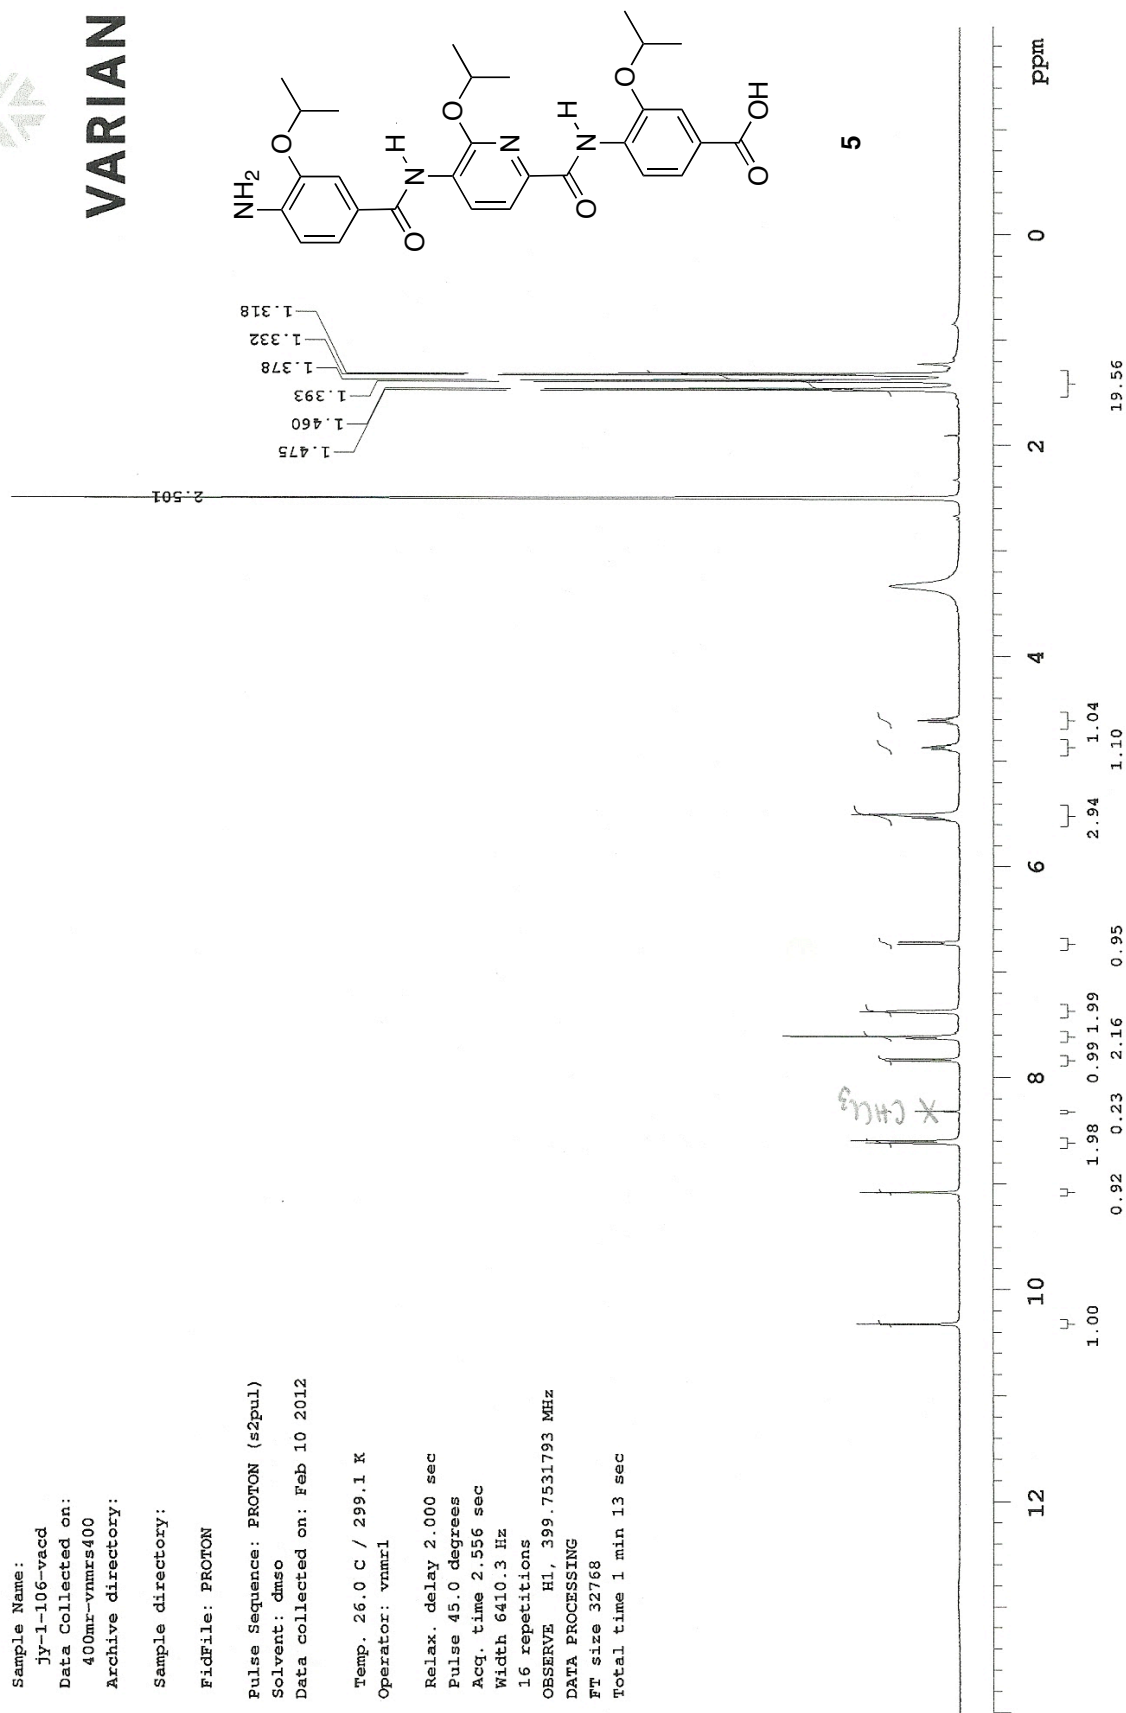



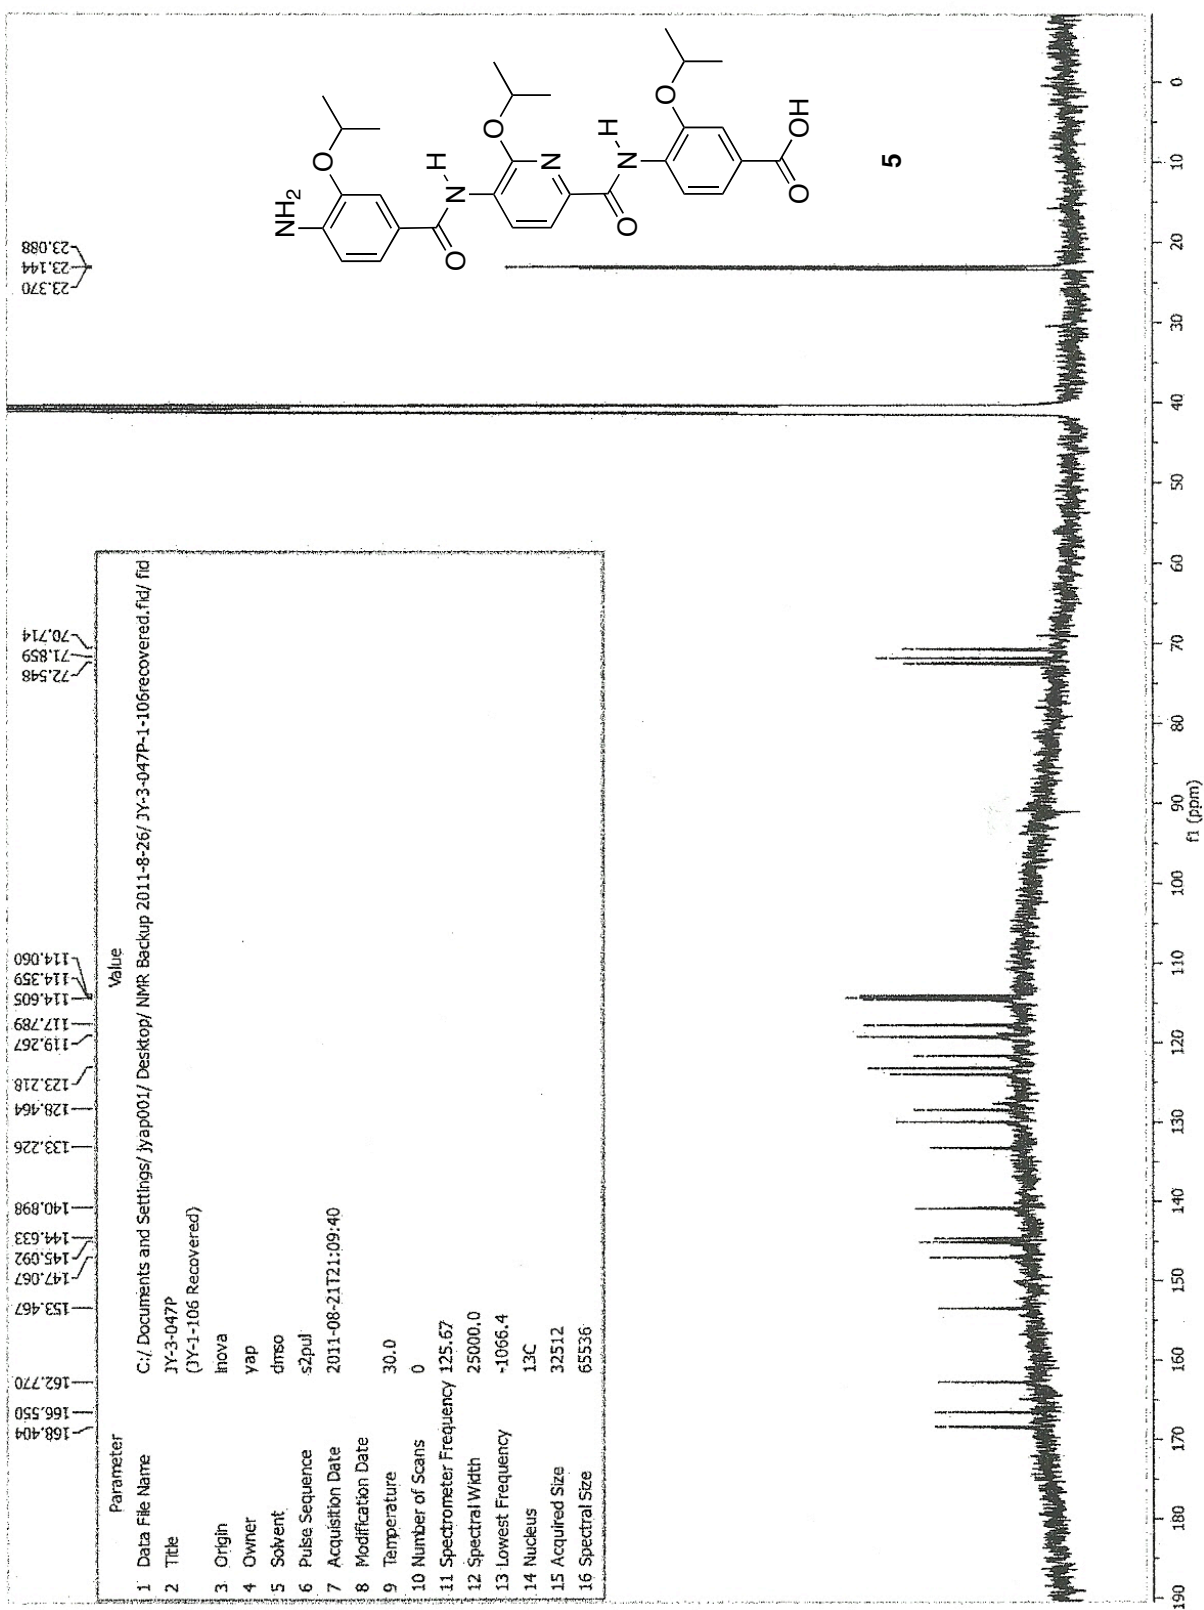

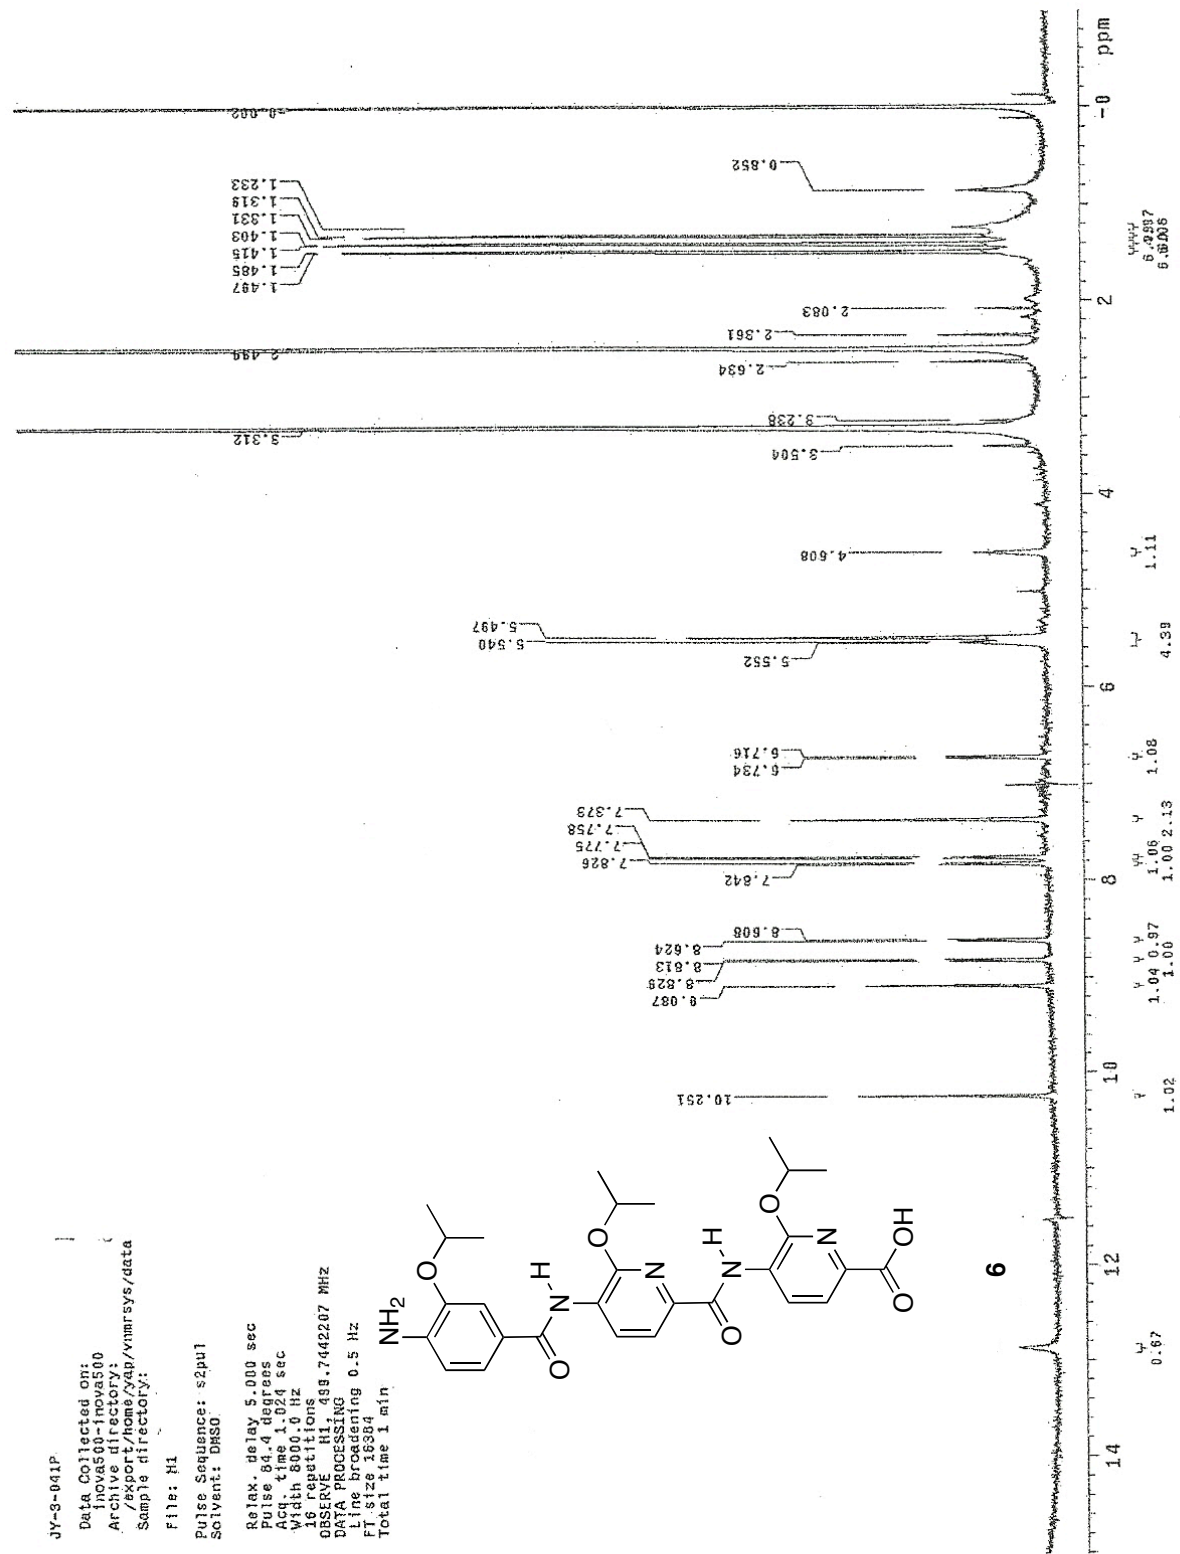

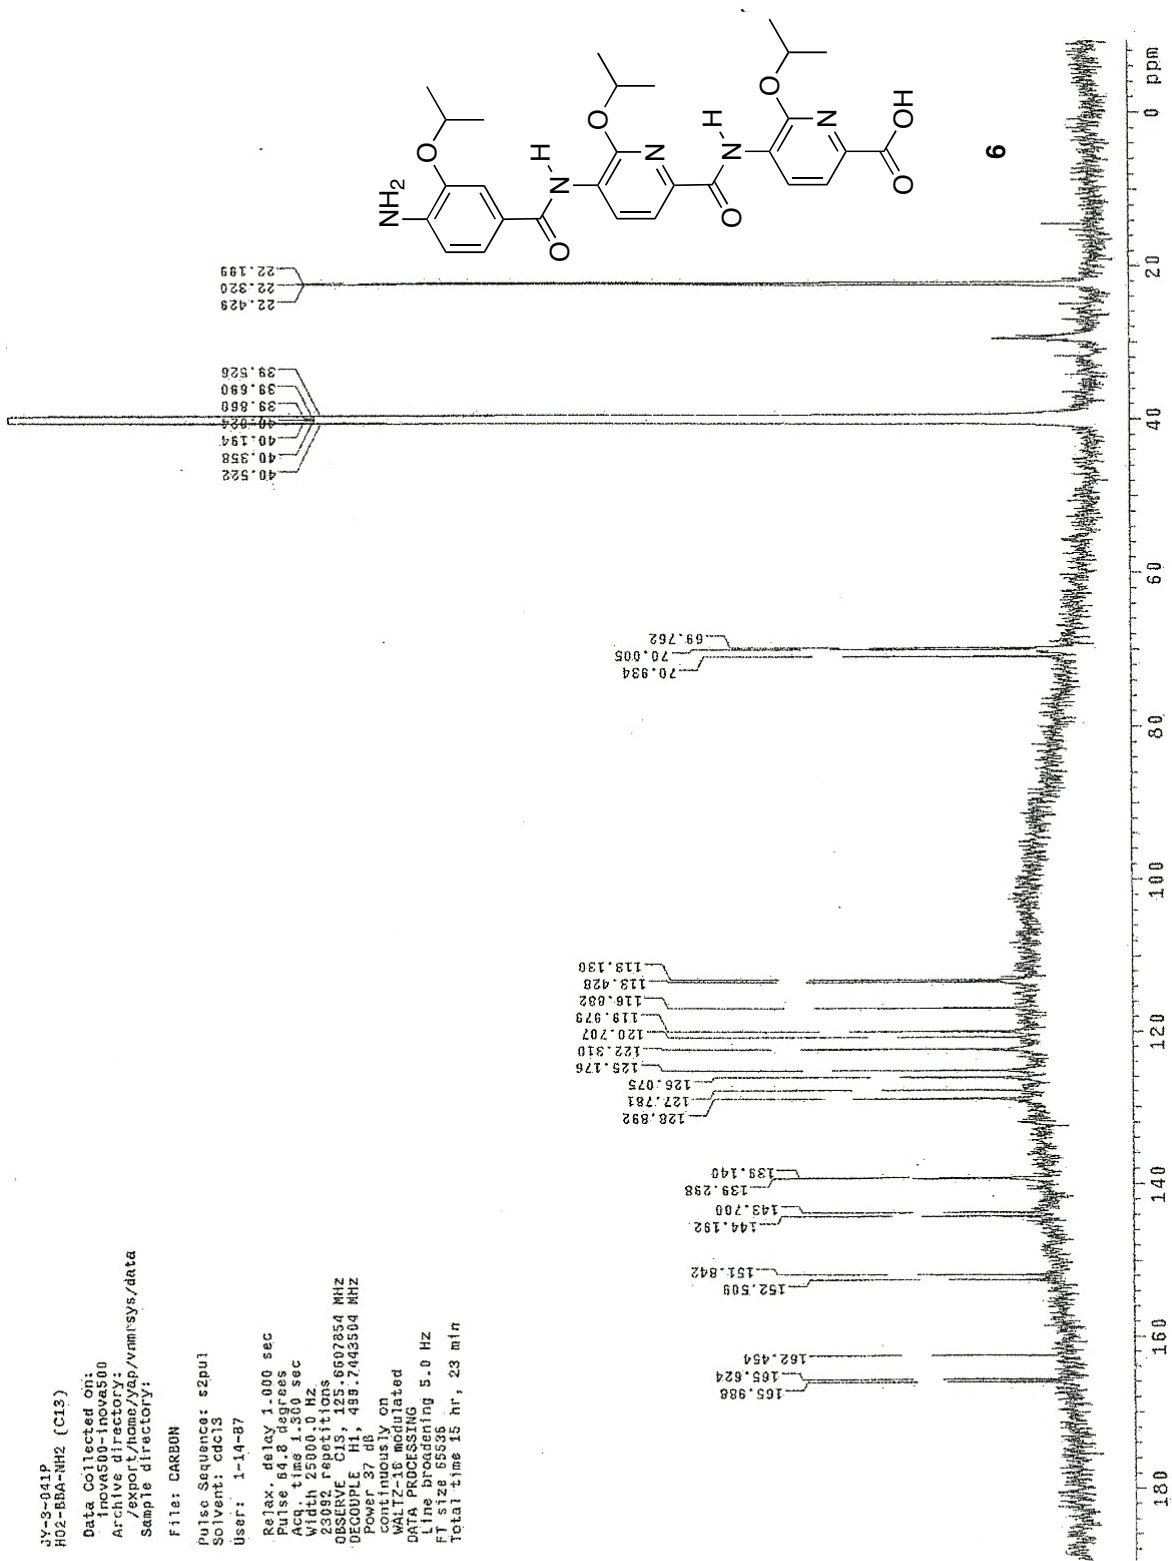

Supplement: c2ob07125h_2.pdf [file c2ob07125h_2.pdf]
